# Supplementary material for: Toward the stereochemical assignment of euvesperins A and B: total synthesis of the possible structures of the natural products
Source: Royal Society of Chemistry journal article supplement (doi:10.1039/d4ob01118j), 2024-01-01
Supplement: d4ob01118j1.pdf [file d4ob01118j1.pdf]

## Supporting information

### Toward the Stereochemical Assignment of Euvesperins A and B: Total Synthesis of the Possible Structures of the Natural Products

Kenichi Kobayashi,<sup>\*a</sup> Yusuke Honma,<sup>b</sup> Kosaku Tanaka III,<sup>\*b</sup> Momoko Suzuki,<sup>a,b</sup> Kazuhiko Takatori,<sup>b</sup> and Hiroshi Kogen<sup>b</sup>

<sup>a</sup> *Graduate School of Pharmaceutical Sciences, Health Sciences University of Hokkaido; 1757 Kanazawa, Tobetsu, Ishikari, Hokkaido 061-0293, Japan.*

<sup>b</sup> *Graduate School of Pharmaceutical Sciences, Meiji Pharmaceutical University; 2-522-1 Noshio, Kiyose, Tokyo 204-8588, Japan.*

*kkobayashi@hoku-iryō-u.ac.jp*

## **Table of Contents**

|                                                                       |     |
|-----------------------------------------------------------------------|-----|
| Materials and Methods.....                                            | S1  |
| Experimental Procedures and Characterization Data .....               | S2  |
| NMR chemical shifts of natural products and synthetic compounds ..... | S10 |
| Experimental Spectra .....                                            | S13 |

**Materials and Methods:**  $^1\text{H}$  NMR spectra were measured at 300 MHz (JNM-AL300, JEOL), 400 MHz (JNM-AL400, ECZ400S, JEOL), or 400 MHz (JNM-ECZL400S, JEOL). Chemical shifts are expressed in ppm relative to tetramethylsilane ( $\delta = 0$ ) as an internal standard ( $\text{CDCl}_3$  solution) or solvent resonance ( $\text{C}_5\text{H}_5\text{N}$ :  $\delta = 8.73$ ). Splitting patterns are indicated as follows: s, singlet; d, doublet; t, triplet; q, quartet; sept, septet; m, multiplet; br, broad peak.  $^{13}\text{C}$  NMR spectra were measured at 100 MHz (JNM-AL400, JEOL), 100 MHz (JNM-ECZL400S, JEOL), or 125 MHz (JNM-ECA500, JEOL).  $^{13}\text{C}$  spectra were calibrated from solvent resonance ( $\text{CDCl}_3$ :  $\delta = 77.00$ ,  $\text{C}_5\text{H}_5\text{N}$ :  $\delta = 150.07$ ). Infrared spectra (IR) were measured on an IR spectrometer (VALOR-III, JASCO) and are reported in wavenumbers ( $\text{cm}^{-1}$ ). High-resolution mass spectra (HRMS) were obtained using a mass spectrometer (JMS 700, JEOL) with a direct inlet system. Optical rotations were measured on a polarimeter (P-2200, JASCO) using a 100 mm pathlength cell. Column chromatography was carried out on silica gel (40–100 mesh). Analytical thin-layer chromatography (TLC) was performed using 0.25 mm silica gel 60-F plates.

Diethyl[1-((2*R*,3*S*)-2-carbamoyl-3-{(*R*)-2-methyl-1-[(triethylsilyl)oxy]propyl}oxiran-2-yl)-1-oxopropan-2-yl]phosphonate (**19**)

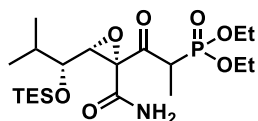

To a stirred solution of diethyl ethylphosphonate (0.29 mL, 1.8 mmol) in THF (3.0 mL) was added *n*-BuLi (2.6 M solution in hexane, 0.84 mL, 1.7 mmol) dropwise at  $-45\text{ }^{\circ}\text{C}$ . After stirring at  $-45\text{ }^{\circ}\text{C}$  for 20 min, amide **20** (100 mg, 0.277 mmol) in THF (1.5 mL) was added. After stirring for 14 h, the reaction was quenched by addition of saturated aqueous  $\text{NH}_4\text{Cl}$  and the mixture was extracted with EtOAc (three times). The combined organic layers were washed with brine, dried over  $\text{MgSO}_4$ , and concentrated *in vacuo*. The crude residue was purified by flash chromatography on silica gel (EtOAc) to afford phosphonate **19** (95 mg, 74% yield) as a colorless oil.

$^1\text{H}$  NMR (400 MHz,  $\text{CDCl}_3$ )  $\delta$  7.18 (6.85)\* (br s, 1H), 5.55 (5.67)\* (br s, 1H), 4.26-4.06 (m, 4H), 3.78 (4.06)\* (dq,  $J = 12.0, 6.7$  Hz, 1H), 3.62 (3.02)\* (d,  $J = 8.0$  Hz, 1H), 3.43 (3.49)\* (dd,  $J = 8.0, 4.0$  Hz, 1H), 1.86-1.69 (m, 1H), 1.42-1.23 (m, 9H), 0.98 (t,  $J = 8.0$  Hz, 9H), 0.92 (d,  $J = 6.8$  Hz, 3H), 0.89 (d,  $J = 6.8$  Hz, 3H), 0.76-0.57 (m, 6H) (\*The  $\delta$  value of the minor isomer);  $^{13}\text{C}$  NMR (100 MHz,  $\text{CDCl}_3$ )  $\delta$  202.2, 164.4 (166.4)\*, 74.33 (74.27)\*, 65.7 (65.8)\*, 64.0 (64.5)\*, 63.56 (63.62)\*, 63.04 (63.09)\*, 62.8 (62.7)\*, 40.6 (41.1)\*, 32.3 (32.2)\*, 18.8 (18.9)\*, 17.1 (16.7)\*, 16.33 (16.38)\*, 16.32 (16.26)\*, 6.8 (3C), 4.96 (5.02)\* (3C) (\*The  $\delta$  value of the minor isomer); IR ( $\text{CHCl}_3$ ) 3439, 3320, 3195, 2958, 2876, 1713, 1697, 1389, 1243, 1055, 1021  $\text{cm}^{-1}$ ;  $[\alpha]_{\text{D}}^{22} +7.1$  ( $c$  0.59,  $\text{CHCl}_3$ ); FAB-HRMS  $m/z$  466.2393 ( $[\text{M}+\text{H}]^+$  calcd for  $\text{C}_{20}\text{H}_{41}\text{NO}_7\text{PSi}$ : 466.2390).

(1*S*,4*S*,5*R*)-4-Isopropyl-*N*,4-dimethoxy-*N*-methyl-2-oxo-6-oxa-3-azabicyclo[3.1.0]hexane-1-carboxamide (**22**)

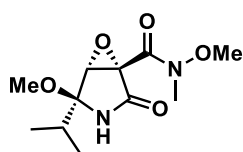

Dess–Martin periodinane (84.8 mg, 0.200 mmol) was added to a stirred solution of alcohol **21** (31.5 mg, 0.128 mmol) in  $\text{CH}_2\text{Cl}_2$  (2.5 mL). After stirring for 1 h, MeOH (2.5 mL) was added to the reaction mixture and  $\text{CH}_2\text{Cl}_2$  was removed under heating at  $75\text{ }^{\circ}\text{C}$ . Then,  $\text{CH}(\text{OMe})_3$  (0.24 mL, 2.2 mmol) and pyridinium *p*-toluenesulfonate (32.7 mg, 0.130 mmol) was added to the resultant mixture. After refluxing for 16 h, the reaction was quenched with  $\text{Et}_3\text{N}$  (0.08 mL, 0.6 mmol), and the mixture was concentrated *in vacuo*. The crude residue was purified by flash chromatography on silica gel (*n*-hexane/EtOAc = 1:2) to afford amide **22** (30.5 mg, 92%) as a colorless oil.

$^1\text{H}$  NMR (300 MHz,  $\text{CDCl}_3$ )  $\delta$  5.61 (br s, 1H), 3.99 (d,  $J = 2.6$  Hz, 1H), 3.78 (s, 3H), 3.34 (s, 3H), 3.28 (br s, 3H), 2.19-1.97 (m, 1H), 1.09 (d,  $J = 7.0$  Hz, 3H), 0.99 (d,  $J = 7.0$  Hz, 3H);  $^{13}\text{C}$  NMR (100 MHz,  $\text{CDCl}_3$ )  $\delta$  169.3, 162.4, 90.9, 61.9, 61.2, 59.8, 50.0, 33.0, 32.2, 17.3, 15.9; IR ( $\text{CHCl}_3$ ) 3267, 2972,

2943, 1720, 1672, 1460, 1427, 1389, 1097, 1065, 942  $\text{cm}^{-1}$ ;  $[\alpha]_{\text{D}}^{24}$   $-41.1$  ( $c$  0.61,  $\text{CHCl}_3$ ); FAB-HRMS  $m/z$  259.1293 ( $[\text{M}+\text{H}]^+$  calcd for  $\text{C}_{11}\text{H}_{19}\text{N}_2\text{O}_5$ : 259.1294).

(1*R*,4*S*,5*R*)-4-Methoxy-1-(2-methylideneoctanoyl)-4-(propan-2-yl)-6-oxa-3-azabicyclo[3.1.0]hexan-2-one (**26**)

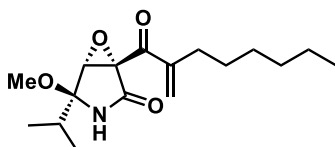

*t*-BuLi (1.65 M in pentane, 0.59 mL, 0.98 mmol) was added dropwise to a stirred solution of allyl iodide **25** (119 mg, 0.50 mmol) in THF (1.7 mL) at  $-78$  °C. After stirring for 30 min, amide **22** (26.8 mg, 0.104 mmol) in THF (1.0 mL) was added. After stirring for 30 min, the reaction was quenched with saturated aqueous  $\text{NH}_4\text{Cl}$ . The mixture was extracted with EtOAc (3 times). The combined organic layers were washed with water and brine, dried over  $\text{MgSO}_4$ , filtered, and concentrated *in vacuo*. The crude residue was purified by flash chromatography on silica gel (*n*-hexane/EtOAc = 4:1) to afford ketone **26** (28.1 mg, 88%) as a pale yellow oil.

$^1\text{H}$  NMR (400 MHz,  $\text{CDCl}_3$ )  $\delta$  6.38 (s, 1H), 6.09 (s, 1H), 5.76 (br s, 1H), 3.89 (d,  $J$  = 2.2 Hz, 1H), 3.34 (s, 3H), 2.39-2.20 (m, 2H), 2.09 (sept,  $J$  = 6.8 Hz, 1H), 1.47-1.21 (m, 8H), 1.08 (d,  $J$  = 6.8 Hz, 3H), 1.00 (d,  $J$  = 6.8 Hz, 3H), 0.88 (t,  $J$  = 6.8 Hz, 3H);  $^{13}\text{C}$  NMR (100 MHz,  $\text{CDCl}_3$ )  $\delta$  190.7, 169.6, 146.9, 130.5, 90.6, 61.8, 61.7, 50.0, 33.0, 31.6, 30.4, 28.9, 28.0, 22.5, 17.3, 16.1, 14.0; IR ( $\text{CHCl}_3$ ) 3230, 2958, 2930, 2872, 2858, 1724, 1667, 1468, 1416, 1389, 1368, 1317, 1098, 1069, 1039, 950  $\text{cm}^{-1}$ ;  $[\alpha]_{\text{D}}^{23}$   $-137.9$  ( $c$  0.27,  $\text{CHCl}_3$ ); FAB-HRMS  $m/z$  332.1840 ( $[\text{M}+\text{Na}]^+$  calcd for  $\text{C}_{17}\text{H}_{27}\text{NO}_4\text{Na}$ : 332.1838).

(1*S*,4*S*,5*R*)-1- $\{(S)$ -1-Hydroxy-2-methylideneoctanoyl $\}$ -4-methoxy-4-(propan-2-yl)-6-oxa-3-azabicyclo[3.1.0]hexan-2-one  $\{(6S)$ -**28** $\}$

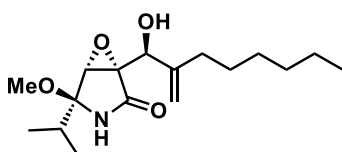

$\text{NaBH}_4$  (9.8 mg, 0.26 mmol) was added a stirred solution of ketone **26** (48.9 mg, 0.158 mmol) in MeOH (4.0 mL) at  $-78$  °C. After stirring for 13 h, the reaction mixture was concentrated *in vacuo*. The residue was diluted with EtOAc and washed with water. The organic layers were dried over  $\text{Na}_2\text{SO}_4$ , filtered, and concentrated *in vacuo*. The crude residue was purified by flash chromatography on silica gel (*n*-hexane/EtOAc = 3:2) to afford alcohol (6*S*)-**28** (37.2 mg, 76%) as a colorless oil.

$^1\text{H}$  NMR (400 MHz,  $\text{CDCl}_3$ )  $\delta$  5.61 (br s, 1H), 5.22 (s, 1H), 5.04 (s, 1H), 4.82 (d,  $J$  = 2.9 Hz, 1H), 3.72 (d,  $J$  = 2.9 Hz, 1H), 3.22 (s, 3H), 2.79 (d,  $J$  = 2.9 Hz, 1H), 2.24-2.13 (m, 1H), 2.12-2.00 (m, 2H), 1.53-1.43 (m, 2H), 1.39-1.22 (m, 6H), 1.07 (d,  $J$  = 6.8 Hz, 3H), 0.97 (d,  $J$  = 6.8 Hz, 3H), 0.88 (t,  $J$  = 6.8 Hz, 3H);  $^{13}\text{C}$  NMR (100 MHz,  $\text{CDCl}_3$ )  $\delta$  179.7, 146.2, 112.8, 90.3, 68.6, 61.8, 60.2, 49.7, 33.0, 32.3, 31.7,

29.1, 27.8, 22.6, 17.4, 15.9, 14.1; IR (CHCl<sub>3</sub>) 3238, 2958, 2929, 2873, 2858, 1716, 1652, 1468, 1457, 1418, 1388, 1366, 1098, 1069, 1026, 951 cm<sup>-1</sup>; [ $\alpha$ ]<sub>D</sub><sup>25</sup> -36.1 (*c* 0.43, CHCl<sub>3</sub>); FAB-HRMS *m/z* 312.2176 ([M+H]<sup>+</sup> calcd for C<sub>17</sub>H<sub>30</sub>NO<sub>4</sub>: 312.2175).

#### Mosher's ester (S1)

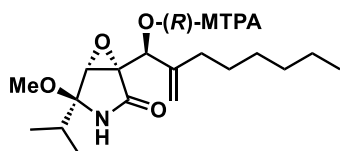

(*S*)-MTPACl (2 drops) and 4-DMAP (cat.) were added to a stirred solution of alcohol (6*S*)-**28** (2.0 mg, 6.4  $\mu$ mol) in pyridine (0.08 mL) at room temperature. After stirring for 22 h, the mixture was diluted with EtOAc and washed with saturated aqueous NH<sub>4</sub>Cl (2 times). The organic layers were dried over Na<sub>2</sub>SO<sub>4</sub>, filtered, and concentrated *in vacuo*. The crude residue was purified by flash chromatography on silica gel (*n*-hexane/EtOAc = 4:1) to afford ester **S1** (3.0 mg, 88%) as a colorless oil.

<sup>1</sup>H NMR (300 MHz, CDCl<sub>3</sub>)  $\delta$  7.57-7.50 (m, 2H), 7.43-7.35 (m, 3H), 6.11 (s, 1H), 5.49 (br s, 1H), 5.33 (s, 1H), 5.17 (br s, 1H), 3.55 (s, 3H), 3.54 (d, *J* = 1.7 Hz, 1H), 3.15 (s, 3H), 2.21-2.12 (m, 2H), 2.03 (sept, *J* = 7.0 Hz, 1H), 1.36-1.19 (m, 8H), 1.00 (d, *J* = 7.0 Hz, 3H), 0.93 (d, *J* = 7.0 Hz, 3H), 0.88 (t, *J* = 6.5 Hz, 3H).

#### Mosher's ester (S2)

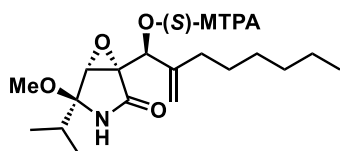

**S2** (1.4 mg, 82% yield, colorless oil) was prepared from (6*S*)-**28** (1.0 mg, 3.2  $\mu$ mol) and (*R*)-MTPACl by a procedure similar to that for **S1**.

<sup>1</sup>H NMR (300 MHz, CDCl<sub>3</sub>)  $\delta$  7.60-7.50 (m, 2H), 7.44-7.34 (m, 3H), 6.04 (s, 1H), 5.59 (br s, 1H), 5.11 (s, 1H), 5.05 (s, 1H), 3.67 (d, *J* = 2.7 Hz, 1H), 3.58 (br s, 3H), 3.17 (s, 3H), 2.17-1.93 (m, 2H), 2.07 (sept, *J* = 6.9 Hz, 1H), 1.51-1.16 (m, 8H), 1.04 (d, *J* = 6.9 Hz, 3H), 0.96 (d, *J* = 6.9 Hz, 3H), 0.88 (t, *J* = 6.8 Hz, 3H).

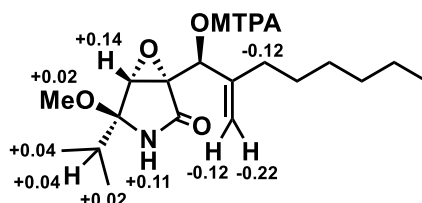

**Fig. S1** Modified Mosher's method: differences of the chemical shifts ( $\Delta\delta = \delta_S - \delta_R$ , CDCl<sub>3</sub>) between (*R*)- and (*S*)-MTPA esters of (6*S*)-**28**.

(1*S*,4*S*,5*R*)-1-((1*S*,2*S*)-1,2-Dihydroxy-2-methyloctyl)-4-methoxy-4-(propan-2-yl)-6-oxa-3-azabicyclo[3.1.0]hexan-2-one {(7*S*)-**29**} and (1*S*,4*S*,5*R*)-1-((1*S*,2*R*)-1,2-dihydroxy-2-methyloctyl)-4-methoxy-4-(propan-2-yl)-6-oxa-3-azabicyclo[3.1.0]hexan-2-one {(7*R*)-**30**}

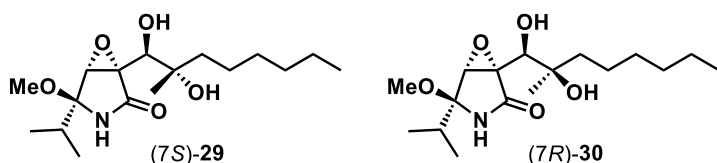

Co(acac)<sub>2</sub> (20 mg, 0.077 mmol) and PhSiH<sub>3</sub> (0.19 mL, 1.6 mmol) were added to a stirred solution of alcohol (6*S*)-**28** (120 mg, 0.385 mmol) in 2,2,2-trifluoroethanol (8.0 mL). After stirring for 1 h under an O<sub>2</sub> atmosphere, the mixture was diluted with EtOAc and washed with saturated aqueous Na<sub>2</sub>S<sub>2</sub>O<sub>3</sub>, water, and brine. The combined organic layers were dried over Na<sub>2</sub>SO<sub>4</sub>, filtered, and concentrated *in vacuo*. The crude residue was purified by flash chromatography on silica gel (*n*-hexane/EtOAc = 3:1) to afford diol (7*S*)-**29** (35.1 mg, 28%) and (7*R*)-**30** (45.2 mg, 36%) as a colorless oil.

(7*S*)-**29**: <sup>1</sup>H NMR (300 MHz, CDCl<sub>3</sub>) δ 5.74 (br s, 1H), 4.90 (s, 1H), 3.68 (d, *J* = 2.8 Hz, 1H), 3.37 (br d, *J* = 9.2 Hz, 1H), 3.36 (s, 3H), 3.26 (br d, *J* = 9.2 Hz, 1H), 2.05 (sept, *J* = 7.0 Hz, 1H), 1.73-1.18 (m, 10H), 1.23 (s, 3H), 1.09 (d, *J* = 6.8 Hz, 3H), 0.96 (d, *J* = 6.8 Hz, 3H), 0.89 (t, *J* = 6.8 Hz, 3H); <sup>13</sup>C NMR (100 MHz, CDCl<sub>3</sub>) δ 173.1, 90.7, 77.2, 73.8, 61.1, 60.6, 50.1, 38.4, 33.3, 31.8, 29.9, 23.3, 22.7, 22.6, 17.3, 15.7, 14.1; IR (CHCl<sub>3</sub>) 3255, 2937, 2872, 2858, 1693, 1467, 1458, 1430, 1389, 1376, 1134, 1095, 1064, 938, 852 cm<sup>-1</sup>; [α]<sub>D</sub><sup>23</sup> -149.3 (*c* 0.27, CHCl<sub>3</sub>); FAB-HRMS *m/z* 330.2282 ([M+H]<sup>+</sup> calcd for C<sub>17</sub>H<sub>32</sub>NO<sub>5</sub>: 330.2280).

(7*R*)-**30**: <sup>1</sup>H NMR (300 MHz, CDCl<sub>3</sub>) δ 5.80 (br s, 1H), 5.11 (s, 1H), 3.70 (d, *J* = 2.8 Hz, 1H), 3.36 (s, 3H), 3.32 (d, *J* = 9.2 Hz, 1H), 3.29 (d, *J* = 9.2 Hz, 1H), 2.05 (sept, *J* = 6.8 Hz, 1H), 1.39-1.20 (m, 10H), 1.34 (s, 3H), 1.08 (d, *J* = 6.8 Hz, 3H), 0.97 (d, *J* = 6.8 Hz, 3H), 0.88 (t, *J* = 6.8 Hz, 3H); <sup>13</sup>C NMR (100 MHz, CDCl<sub>3</sub>) δ 173.1, 90.7, 74.7, 73.2, 61.2, 60.8, 50.1, 38.7, 33.3, 31.8, 29.7, 24.0, 22.9, 22.6, 17.3, 15.8, 14.1; IR (CHCl<sub>3</sub>) 3249, 2931, 2858, 2176, 1693, 1468, 1430, 1384, 1132, 1094, 1064, 934, 849 cm<sup>-1</sup>; [α]<sub>D</sub><sup>25</sup> -124.3 (*c* 0.07, CHCl<sub>3</sub>); FAB-HRMS *m/z* 330.2284 ([M+H]<sup>+</sup> calcd for C<sub>17</sub>H<sub>32</sub>NO<sub>5</sub>: 330.2280).

(1*S*,4*S*,5*R*)-1-((5*S*)-5-Hexyl-2,2,5-trimethyl-1,3-dioxolan-4-yl)-4-methoxy-4-(propan-2-yl)-6-oxa-3-azabicyclo[3.1.0]hexan-2-one (**S3**)

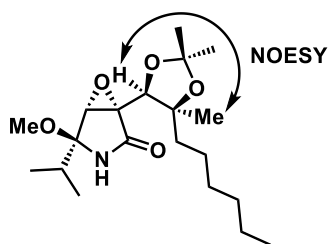

2,2-Dimethoxy propane (0.06 mL, 0.2 mmol) and *p*-TsOH (catalytic amount) were added to a stirred solution of (7*S*)-**29** (3.8 mg, 0.012 mmol) in CH<sub>2</sub>Cl<sub>2</sub> (0.2 mL) at room temperature. After stirring for

22 h, the mixture was diluted with Et<sub>2</sub>O and washed with saturated aqueous NaHCO<sub>3</sub>, water, and brine. The combined organic layers were dried over Na<sub>2</sub>SO<sub>4</sub>, filtered, and concentrated *in vacuo*. The crude residue was purified by flash chromatography on silica gel (*n*-hexane/EtOAc = 4:1) to afford acetone **S3** (1.4 mg, 33 %) as a yellow oil.

<sup>1</sup>H NMR (300 MHz, CDCl<sub>3</sub>) δ 5.68 (br s, 1H), 4.51 (s, 1H), 4.08 (d, *J* = 2.7 Hz, 1H), 3.28 (s, 3H), 2.16 (sept, *J* = 6.6 Hz, 1H), 1.54-1.16 (m, 10H), 1.49 (s, 3H), 1.42 (s, 3H), 1.39 (s, 3H), 1.07 (d, *J* = 6.6 Hz, 3H), 1.06 (d, *J* = 6.6 Hz, 3H), 0.87 (t, *J* = 6.7 Hz, 3H).

(1*S*,4*S*,5*R*)-1-((5*R*)-5-Hexyl-2,2,5-trimethyl-1,3-dioxolan-4-yl)-4-methoxy-4-(propan-2-yl)-6-oxa-3-azabicyclo[3.1.0]hexan-2-one (**S4**)

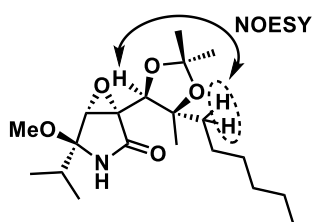

**S4** (1.5 mg, 68% yield, yellow oil) was prepared from (7*R*)-**30** (2.0 mg, 6.1 μmol) by a procedure similar to that for **S3**.

<sup>1</sup>H NMR (300 MHz, CDCl<sub>3</sub>) δ 5.78 (br s, 1H), 4.47 (s, 1H), 4.04 (d, *J* = 2.7 Hz, 1H), 3.28 (s, 3H), 2.15 (sept, *J* = 6.9 Hz, 1H), 1.91-1.61 (m, 2H), 1.51-1.17 (m, 8H), 1.45 (s, 3H), 1.37 (s, 3H), 1.25 (s, 3H), 1.06 (d, *J* = 6.9 Hz, 3H), 1.05 (d, *J* = 6.9 Hz, 3H), 0.88 (t, *J* = 6.4 Hz, 3H).

(1*R*,4*S*,5*R*)-1-((*S*)-2-Hydroxy-2-methyloctanoyl)-4-methoxy-4-(propan-2-yl)-6-oxa-3-azabicyclo[3.1.0]hexan-2-one {(7*S*)-**31**}

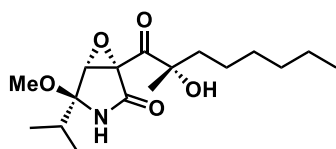

Saturated aqueous NaHCO<sub>3</sub> (0.17 mL), AZADOL (0.4 mg, 0.003 mmol), KBr (3.2 mg, 0.027 mmol), and 5% NaClO aqueous solution (0.01 mL, 0.1 mmol) were added to a stirred solution of diol (7*S*)-**29** (9.0 mg, 0.027 mmol) in CH<sub>2</sub>Cl<sub>2</sub> (0.34 mL) at 0 °C. After vigorously stirring for 30 min, the reaction was quenched with saturated aqueous Na<sub>2</sub>S<sub>2</sub>O<sub>3</sub>. The mixture was extracted with EtOAc (3 times). The combined organic layers were washed with water and brine, dried over Na<sub>2</sub>SO<sub>4</sub>, filtered, and concentrated *in vacuo*. The crude residue was purified by flash chromatography on silica gel (*n*-hexane/EtOAc = 3:1) to afford ketone (7*S*)-**31** (8.3 mg, 93%) as a colorless oil.

<sup>1</sup>H NMR (400 MHz, CDCl<sub>3</sub>) δ 5.75 (br s, 1H), 3.98 (d, *J* = 2.4 Hz, 1H), 3.58 (br s, 1H), 3.32 (s, 3H), 2.09 (sept, *J* = 6.8 Hz, 1H), 2.00-1.88 (m, 1H), 1.81-1.69 (m, 1H), 1.50-1.18 (m, 8H), 1.32 (s, 3H), 1.09 (d, *J* = 6.8 Hz, 3H), 1.00 (d, *J* = 6.8 Hz, 3H), 0.87 (t, *J* = 7.1 Hz, 3H); <sup>13</sup>C NMR (100 MHz, CDCl<sub>3</sub>) δ 203.9, 169.6, 90.6, 80.0, 63.4, 61.9, 50.3, 38.6, 33.6, 31.6, 29.5, 24.1, 23.1, 22.6, 17.4, 16.1, 14.1; IR

(CHCl<sub>3</sub>) 3244, 2958, 2931, 2872, 2857, 2359, 2342, 1731, 1714, 1673, 1457, 1430, 1419, 1395, 1363, 1098, 1068, 1036 cm<sup>-1</sup>; [ $\alpha$ ]<sub>D</sub><sup>25</sup> -49.2 (*c* 1.39, CHCl<sub>3</sub>); FAB-HRMS *m/z* 328.2130 ([M+H]<sup>+</sup> calcd for C<sub>17</sub>H<sub>30</sub>NO<sub>5</sub>: 328.2124).

(1*R*,4*S*,5*R*)-1-((*R*)-2-Hydroxy-2-methyloctanoyl)-4-methoxy-4-(propan-2-yl)-6-oxa-3-azabicyclo[3.1.0]hexan-2-one {(7*R*)-**S5**}

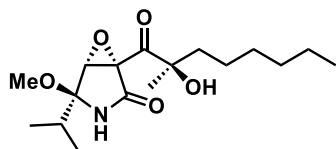

(7*R*)-**S5** (9.1 mg, 95% yield, colorless oil) was prepared from (7*R*)-**30** (9.7 mg, 0.029  $\mu$ mol) by a procedure similar to that for (7*S*)-**31**.

<sup>1</sup>H NMR (400 MHz, CDCl<sub>3</sub>)  $\delta$  5.78 (br s, 1H), 3.94 (s, 1H), 3.34 (s, 3H), 3.25 (br s, 1H), 2.09 (sept, *J* = 7.0 Hz, 1H), 1.87-1.73 (m, 1H), 1.67-1.45 (m, 1H), 1.51 (s, 3H), 1.45-1.17 (m, 8H), 1.09 (d, *J* = 7.0 Hz, 3H), 0.99 (d, *J* = 7.0 Hz, 3H), 0.87 (t, *J* = 6.6 Hz, 3H); <sup>13</sup>C NMR (100 MHz, CDCl<sub>3</sub>)  $\delta$  203.6, 170.0, 90.8, 80.2, 63.7, 62.8, 50.3, 39.3, 33.4, 31.6, 29.4, 24.6, 23.5, 22.5, 17.2, 16.0, 14.0; IR (CHCl<sub>3</sub>) 3256, 2957, 2931, 2871, 2857, 1729, 1467, 1430, 1390, 1368, 1132, 1097, 1072, 1036, 850 cm<sup>-1</sup>; [ $\alpha$ ]<sub>D</sub><sup>21</sup> -84.6 (*c* 0.35, CHCl<sub>3</sub>); FAB-HRMS *m/z* 328.2130 ([M+H]<sup>+</sup> calcd for C<sub>17</sub>H<sub>30</sub>NO<sub>5</sub>: 328.2124).

(1*R*,4*S*,5*R*)-4-Hydroxy-1-((*S*)-2-hydroxy-2-methyloctanoyl)-4-(propan-2-yl)-6-oxa-3-azabicyclo[3.1.0]hexan-2-one {(4*S*,7*S*)-**8**} and (1*R*,4*R*,5*R*)-4-hydroxy-1-((*S*)-2-hydroxy-2-methyloctanoyl)-4-(propan-2-yl)-6-oxa-3-azabicyclo[3.1.0]hexan-2-one {(4*R*,7*S*)-**9**}

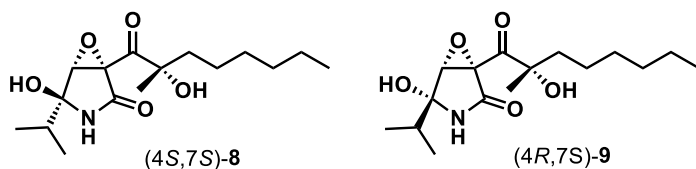

Aminal (7*S*)-**31** (16.1 mg, 0.049 mmol) was dissolved in water/TFA (1:1 v/v, 0.78 mL), and the solution was stirred for 10 min at room temperature. The reaction was quenched with saturated aqueous NaHCO<sub>3</sub>, and the mixture was extracted with EtOAc (3 times). The combined organic layers were washed with water and brine, dried over Na<sub>2</sub>SO<sub>4</sub>, filtered, and concentrated *in vacuo*. The crude residue was purified by flash chromatography on silica gel (*n*-hexane/EtOAc = 6:1) to afford hemiaminal (4*S*,7*S*)-**8** (6.2 mg, 40%) and (4*R*,7*S*)-**9** (0.8 mg, 5%) as a pale yellow oil.

(4*S*,7*S*)-**8**: <sup>1</sup>H NMR (300 MHz, C<sub>5</sub>D<sub>5</sub>N)  $\delta$  10.17 (br s, 1H), 8.23 (br s, 1H), 7.02 (br s, 1H), 4.74 (d, *J* = 2.1 Hz, 1H), 2.36 (sept, *J* = 6.9 Hz, 1H), 2.43-2.26 (m, 1H), 2.18-2.01 (m, 1H), 1.78-1.63 (m, 2H), 1.59 (s, 3H), 1.35 (d, *J* = 6.9 Hz, 3H), 1.32 (d, *J* = 6.9 Hz, 3H), 1.29-1.12 (m, 6H), 0.76 (t, *J* = 6.9 Hz, 3H); <sup>13</sup>C NMR (100 MHz, C<sub>5</sub>D<sub>5</sub>N)  $\delta$  206.2, 170.8, 88.1, 80.1, 65.4, 63.7, 39.3, 34.7, 32.1, 30.2, 25.2, 23.9, 23.0, 18.2, 16.9, 14.3; IR (CHCl<sub>3</sub>) 3309, 2957, 2929, 2858, 1732, 1716, 1685, 1558, 1541, 1521, 1507, 1472, 1457 cm<sup>-1</sup>; [ $\alpha$ ]<sub>D</sub><sup>22</sup> -71.3 (*c* 0.41, CHCl<sub>3</sub>); FAB-HRMS *m/z* 314.1973 ([M+H]<sup>+</sup> calcd for C<sub>16</sub>H<sub>28</sub>NO<sub>5</sub>: 314.1967).



(4*R*,7*S*)-**9**:  $^1\text{H}$  NMR (300 MHz,  $\text{C}_5\text{D}_5\text{N}$ )  $\delta$  9.92 (br s, 1H), 8.47 (br s, 1H), 7.08 (br s, 1H), 4.72 (d,  $J$  = 2.4 Hz, 1H), 2.52-2.28 (m, 2H), 2.25-2.03 (m, 1H), 1.85-1.64 (m, 2H), 1.62 (s, 3H), 1.42-1.06 (m, 6H), 1.32 (d,  $J$  = 6.9 Hz, 3H), 1.29 (d,  $J$  = 6.9 Hz, 3H), 0.76 (t,  $J$  = 7.2 Hz, 3H);  $^{13}\text{C}$  NMR (125 MHz,  $\text{C}_5\text{D}_5\text{N}$ )  $\delta$  206.7, 169.6, 88.4, 80.0, 71.0, 64.0, 39.4, 36.0, 32.1, 30.2, 25.5, 23.9, 23.0, 17.00, 16.97, 14.3; IR ( $\text{CHCl}_3$ ) 3545, 3019, 2931, 2858, 2369, 2322, 1716, 1698, 1684, 1558, 1541, 1533, 1521, 1507, 1214  $\text{cm}^{-1}$ ;  $[\alpha]_{\text{D}}^{22}$  +23.2 ( $c$  0.04,  $\text{CHCl}_3$ ); FAB-HRMS  $m/z$  314.1973 ( $[\text{M}+\text{H}]^+$  calcd for  $\text{C}_{16}\text{H}_{28}\text{NO}_5$ : 314.1967).

(1*R*,4*S*,5*R*)-4-Hydroxy-1-((*R*)-2-hydroxy-2-methyloctanoyl)-4-(propan-2-yl)-6-oxa-3-azabicyclo[3.1.0]hexan-2-one {(4*S*,7*R*)-**10**} and (1*R*,4*R*,5*R*)-4-hydroxy-1-((*R*)-2-hydroxy-2-methyloctanoyl)-4-(propan-2-yl)-6-oxa-3-azabicyclo[3.1.0]hexan-2-one {(4*R*,7*R*)-**11**}

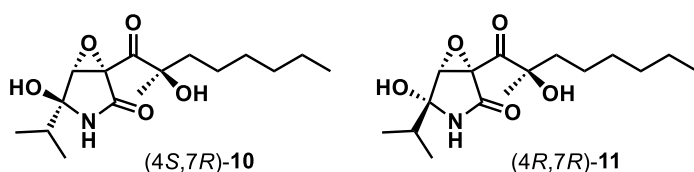

(4*S*,7*R*)-**10** (4.7 mg, 43%, pale yellow oil) and (4*R*,7*R*)-**11** (0.9 mg, 8%, pale yellow oil) were prepared from (7*R*)-**S5** (11.5 mg, 0.035 mmol) by a procedure similar to that for (4*S*,7*S*)-**8** and (4*R*,7*S*)-**9**.

(4*S*,7*R*)-**10**:  $^1\text{H}$  NMR (300 MHz,  $\text{C}_5\text{D}_5\text{N}$ )  $\delta$  10.13 (br s, 1H), 7.79 (br s, 1H), 7.34 (br s, 1H), 4.71 (d,  $J$  = 2.4 Hz, 1H), 2.37 (sept,  $J$  = 7.2 Hz, 1H), 2.14-1.97 (m, 1H), 1.93-1.76 (m, 1H), 1.83 (s, 3H), 1.79-1.58 (m, 1H), 1.45-1.01 (m, 7H), 1.34 (d,  $J$  = 6.9 Hz, 3H), 1.31 (d,  $J$  = 7.2 Hz, 3H), 0.78 (t,  $J$  = 6.6 Hz, 3H);  $^{13}\text{C}$  NMR (125 MHz,  $\text{C}_5\text{D}_5\text{N}$ )  $\delta$  206.6, 171.1, 88.4, 80.3, 65.1, 64.7, 40.8, 34.6, 32.0, 30.1, 25.0, 24.1, 23.0, 18.2, 16.9, 14.4; IR ( $\text{CHCl}_3$ ) 3335, 2958, 2930, 2859, 1733, 1717, 1558, 1541, 1507, 1472, 1457  $\text{cm}^{-1}$ ;  $[\alpha]_{\text{D}}^{20}$  +202.4 ( $c$  0.15,  $\text{CHCl}_3$ ); FAB-HRMS  $m/z$  314.1968 ( $[\text{M}+\text{H}]^+$  calcd for  $\text{C}_{16}\text{H}_{28}\text{NO}_5$ : 314.1967).

(4*R*,7*R*)-**11**:  $^1\text{H}$  NMR (400 MHz,  $\text{C}_5\text{D}_5\text{N}$ )  $\delta$  9.88 (br s, 1H), 8.46 (br s, 1H), 7.38 (br s, 1H), 4.69 (d,  $J$  = 2.4 Hz, 1H), 2.52 (sept,  $J$  = 6.8 Hz, 1H), 2.17-2.00 (m, 1H), 1.93-1.63 (m 2H), 1.88 (s, 3H), 1.45-1.10 (m, 7H), 1.37 (d,  $J$  = 6.8 Hz, 3H), 1.36 (d,  $J$  = 6.8 Hz, 3H), 0.80 (t,  $J$  = 6.9 Hz, 3H);  $^{13}\text{C}$  NMR (100 MHz,  $\text{C}_5\text{D}_5\text{N}$ )  $\delta$  207.5, 169.8, 88.7, 80.0, 67.3, 63.8, 41.4, 36.0, 32.1, 30.1, 25.5, 24.2, 23.0, 17.1, 17.0, 14.4; IR ( $\text{CHCl}_3$ ) 3360, 2958, 2929, 2859, 2359, 2342, 2331, 1732, 1716, 1699, 1558, 1541, 1507, 1472, 1457  $\text{cm}^{-1}$ ;  $[\alpha]_{\text{D}}^{21}$  +289.8 ( $c$  0.14,  $\text{CHCl}_3$ ); FAB-HRMS  $m/z$  314.1968 ( $[\text{M}+\text{H}]^+$  calcd for  $\text{C}_{16}\text{H}_{28}\text{NO}_5$ : 314.1967).

(2*S*,3*aR*,6*S*,6*aS*)-2-Hexyl-3*a*,6-dihydroxy-6-(propan-2-yl)-2-methyltetrahydro-2*H*-furo[2,3-*c*]pyrrole-3,4-dione {(4*S*,7*S*)-**12**}

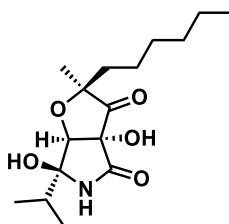

A solution of NaOMe (2.6 mg, 0.048 mmol) in MeOH (0.26 mL) was added to a mixture of (4*S*,7*S*)-**8** and (4*R*,7*S*)-**9** (5.6:1 ratio, 4.9 mg, 0.016 mmol) in MeOH (0.54 mL). After stirring for 1 h, the reaction mixture was concentrated *in vacuo*. The residue was diluted with EtOAc and washed with water. The organic layers were dried over Na<sub>2</sub>SO<sub>4</sub>, filtered, and concentrated *in vacuo*. The crude residue was purified by flash chromatography on silica gel (*n*-hexane/EtOAc = 1:1) to afford alcohol (4*S*,7*S*)-**12** (4.1 mg, 84%) as a pale yellow oil.

<sup>1</sup>H NMR (400 MHz, C<sub>5</sub>D<sub>5</sub>N) δ 10.37 (br s, 1H), 9.11 (br s, 1H), 8.71 (br s, 1H), 5.08 (s, 1H), 2.66 (sept, *J* = 7.2 Hz, 1H), 2.06-1.92 (m, 1H), 1.85 (s, 3H), 1.82-1.71 (m, 1H), 1.70-1.60 (m, 1H), 1.55-1.45 (m, 1H), 1.43 (d, *J* = 6.8 Hz, 3H), 1.19 (d, *J* = 6.8 Hz, 3H), 1.12-0.85 (m, 6H), 0.71 (t, *J* = 6.8 Hz, 3H); <sup>13</sup>C NMR (100 MHz, C<sub>5</sub>D<sub>5</sub>N) δ 209.0, 171.9, 91.6, 88.2, 84.9, 77.9, 42.4, 32.5, 32.0, 29.9, 24.3, 23.7, 23.0, 17.8, 17.3, 14.3; IR (CHCl<sub>3</sub>) 3313, 2952, 2931, 2871, 2858, 1744, 1715, 1470, 1458, 1369, 1175, 1114, 1074 cm<sup>-1</sup>; [α]<sub>D</sub><sup>23</sup> +84.4 (*c* 0.33, CHCl<sub>3</sub>); FAB-HRMS *m/z* 314.1972 ([M+H]<sup>+</sup> calcd for C<sub>16</sub>H<sub>28</sub>NO<sub>5</sub>: 314.1967).

(2*R*,3*aR*,6*S*,6*aS*)-2-Hexyl-3*a*,6-dihydroxy-6-(propan-2-yl)-2-methyltetrahydro-2*H*-furo[2,3-*c*]pyrrole-3,4-dione {(4*S*,7*R*)-**14**}

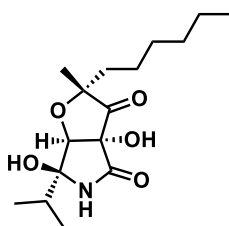

(4*S*,7*R*)-**14** (7.0 mg, 81%, pale yellow oil) was prepared from a mixture of (4*S*,7*R*)-**10** and (4*R*,7*R*)-**11** (5.6:1 ratio, 8.6 mg, 0.027 mmol) by a procedure similar to that for the (4*S*,7*S*)-**12**.

<sup>1</sup>H NMR (300 MHz, C<sub>5</sub>D<sub>5</sub>N) δ 10.30 (br s, 1H), 9.11 (br s, 1H), 8.63 (br s, 1H), 5.07 (s, 1H), 2.63 (sept, *J* = 6.9 Hz, 1H), 2.45 (dt, *J* = 4.5, 12.3 Hz, 1H), 2.16-2.02 (m, 1H), 1.79-1.62 (m, 1H), 1.60 (s, 3H), 1.49-1.33 (m, 1H), 1.37 (d, *J* = 6.9 Hz, 3H), 1.31-1.08 (m, 6H), 1.24 (d, *J* = 6.9 Hz, 3H), 0.79 (t, *J* = 7.2 Hz, 3H); <sup>13</sup>C NMR (100 MHz, C<sub>5</sub>D<sub>5</sub>N) δ 209.3, 172.1, 91.4, 88.3, 84.2, 77.6, 39.7, 32.7, 32.3, 30.3, 28.2, 23.8, 23.1, 17.9, 17.4, 14.4; IR (CHCl<sub>3</sub>) 3333, 2958, 2928, 2872, 2857, 1743, 1716, 1457, 1417, 1373, 1338, 1113, 1074, 1023 cm<sup>-1</sup>; [α]<sub>D</sub><sup>23</sup> +37.1 (*c* 0.48, CHCl<sub>3</sub>); FAB-HRMS *m/z* 314.1959 ([M+H]<sup>+</sup> calcd for C<sub>16</sub>H<sub>28</sub>NO<sub>5</sub>: 314.1967).

**Table S1**  $^1\text{H}$  and  $^{13}\text{C}$  NMR data of natural euvesperin A, and synthetic (4*S*,7*S*)-**8** and (4*S*,7*R*)-**10**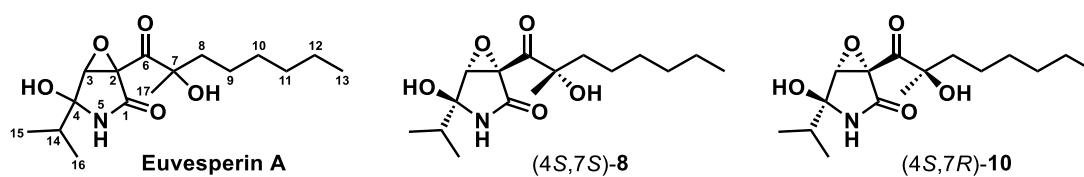

| Position | Natural euvesperin A (isomer-1) |                     | (4 <i>S</i> ,7 <i>S</i> )- <b>8</b> |                     | Natural euvesperin A (isomer-2) |                     | (4 <i>S</i> ,7 <i>R</i> )- <b>10</b> |                     |
|----------|---------------------------------|---------------------|-------------------------------------|---------------------|---------------------------------|---------------------|--------------------------------------|---------------------|
|          | $\delta_{\text{H}}$             | $\delta_{\text{C}}$ | $\delta_{\text{H}}$                 | $\delta_{\text{C}}$ | $\delta_{\text{H}}$             | $\delta_{\text{C}}$ | $\delta_{\text{H}}$                  | $\delta_{\text{C}}$ |
| 1        |                                 | 170.7               |                                     | 170.8               |                                 | 171.1               |                                      | 171.1               |
| 2        |                                 | 63.7                |                                     | 63.7                |                                 | 64.7                |                                      | 64.7                |
| 3        | 4.75<br>(d, 2.2)                | 65.4                | 4.74<br>(d, 2.1)                    | 65.4                | 4.71<br>(d, 1.8)                | 65.1                | 4.71<br>(d, 2.4)                     | 65.1                |
| 4        |                                 | 88.1                |                                     | 88.1                |                                 | 88.4                |                                      | 88.4                |
| 5        | 10.17<br>(d, 2.2)               |                     | 10.17<br>(br s)                     |                     | 10.14<br>(d, 1.8)               |                     | 10.13<br>(br s)                      |                     |
| 6        |                                 | 206.2               |                                     | 206.2               |                                 | 206.7               |                                      | 206.6               |
| 7        | -                               | 80.0                |                                     | 80.1                | -                               | 80.2                | -                                    | 80.3                |
| 8        | 2.08, 2.36<br>(br s)            | 39.3                | 2.18-2.01<br>2.43-2.26<br>(m)       | 39.3                | 1.83, 2.06<br>(br s)            | 40.7                | 1.93-1.76<br>2.14-1.97<br>(m)        | 40.8                |
| 9        | 1.23, 1.28<br>(m)               | 30.2                | 1.29-1.12<br>(m)                    | 30.2                | 1.23, 1.28<br>(m)               | 30.2                | 1.12-1.28<br>(m)                     | 30.1                |
| 10       | 1.67, 1.72<br>(m)               | 23.9                | 1.78-1.63<br>(m)                    | 23.9                | 1.48, 1.80<br>(m)               | 23.7                | 1.45-1.01<br>1.79-1.58<br>(m)        | 24.1                |
| 11       | 1.02, 1.14<br>(m)               | 32.1                | 1.29-1.12<br>(m)                    | 32.1                | 1.16, 1.24<br>(m)               | 32.1                | 1.45-1.01<br>(m)                     | 32.0                |
| 12       | 1.16, 1.22<br>(m)               | 23.0                | 1.29-1.12<br>(m)                    | 23.0                | 1.16, 1.22<br>(m)               | 23.0                | 1.45-1.01<br>(m)                     | 23.0                |
| 13       | 0.76<br>(t, 6.0)                | 14.3                | 0.76<br>(t, 6.9)                    | 14.3                | 0.78<br>(t, 6.0)                | 14.3                | 0.78<br>(t, 6.6)                     | 14.4                |
| 14       | 2.37<br>(dq, 7.3, 7.3)          | 34.6                | 2.36<br>(sept, 6.9)                 | 34.7                | 2.35<br>(dq, 7.3, 7.3)          | 34.6                | 2.37<br>(sept, 7.2)                  | 34.6                |
| 15       | 1.35<br>(d, 7.3)                | 16.9                | 1.35<br>(d, 6.9)                    | 16.9                | 1.31<br>(d, 7.3)                | 18.1                | 1.31<br>(d, 7.2)                     | 18.2                |
| 16       | 1.32<br>(d, 7.3)                | 18.1                | 1.32<br>(d, 6.9)                    | 18.2                | 1.34<br>(d, 7.3)                | 16.9                | 1.34<br>(d, 6.9)                     | 16.9                |
| 17       | 1.59<br>(s)                     | 28.0                | 1.59<br>(s)                         | 25.2                | 1.83<br>(s)                     | 24.9                | 1.83<br>(s)                          | 25.0                |

**Table S2**  $^1\text{H}$  and  $^{13}\text{C}$  NMR data of natural euvesperin A, and synthetic (4*R*,7*S*)-**9** and (4*R*,7*R*)-**11**

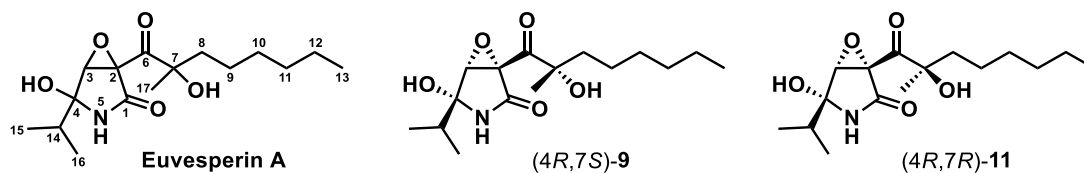

| Position | Natural euvesperin A (isomer-1) |                     | (4 <i>R</i> ,7 <i>S</i> )- <b>9</b> |                     | Natural euvesperin A (isomer-2) |                     | (4 <i>R</i> ,7 <i>R</i> )- <b>11</b> |                     |
|----------|---------------------------------|---------------------|-------------------------------------|---------------------|---------------------------------|---------------------|--------------------------------------|---------------------|
|          | $\delta_{\text{H}}$             | $\delta_{\text{C}}$ | $\delta_{\text{H}}$                 | $\delta_{\text{C}}$ | $\delta_{\text{H}}$             | $\delta_{\text{C}}$ | $\delta_{\text{H}}$                  | $\delta_{\text{C}}$ |
| 1        |                                 | 170.7               |                                     | 169.6               |                                 | 171.1               |                                      | 169.8               |
| 2        |                                 | 63.7                |                                     | 64.0                |                                 | 64.7                |                                      | 63.8                |
| 3        | 4.75<br>(d, 2.2)                | 65.4                | 4.72<br>(d, 2.4)                    | 71.0                | 4.71<br>(d, 1.8)                | 65.1                | 4.69<br>(d, 2.4)                     | 67.3                |
| 4        |                                 | 88.1                |                                     | 88.4                |                                 | 88.4                |                                      | 88.7                |
| 5        | 10.17<br>(d, 2.2)               |                     | 9.92<br>(br s)                      |                     | 10.14<br>(d, 1.8)               |                     | 9.88<br>(br s)                       |                     |
| 6        |                                 | 206.2               |                                     | 206.7               |                                 | 206.7               |                                      | 207.5               |
| 7        | -                               | 80.0                |                                     | 80.0                | -                               | 80.2                | -                                    | 80.0                |
| 8        | 2.08, 2.36<br>(br s)            | 39.3                | 2.25-2.03<br>2.52-2.28<br>(m)       | 39.4                | 1.83, 2.06<br>(br s)            | 40.7                | 1.93-1.63<br>2.17-2.00<br>(m)        | 41.4                |
| 9        | 1.23, 1.28<br>(m)               | 30.2                | 1.42-1.06<br>(m)                    | 30.2                | 1.23, 1.28<br>(m)               | 30.2                | 1.45-1.10<br>(m)                     | 30.1                |
| 10       | 1.67, 1.72<br>(m)               | 23.9                | 1.85-1.64<br>(m)                    | 23.9                | 1.48, 1.80<br>(m)               | 23.7                | 1.45-1.10<br>1.93-1.63<br>(m)        | 24.2                |
| 11       | 1.02, 1.14<br>(m)               | 32.1                | 1.42-1.06<br>(m)                    | 32.1                | 1.16, 1.24<br>(m)               | 32.1                | 1.45-1.10<br>(m)                     | 32.1                |
| 12       | 1.16, 1.22<br>(m)               | 23.0                | 1.42-1.06<br>(m)                    | 23.0                | 1.16, 1.22<br>(m)               | 23.0                | 1.45-1.10<br>(m)                     | 23.0                |
| 13       | 0.76<br>(t, 6.0)                | 14.3                | 0.76<br>(t, 7.2)                    | 14.3                | 0.78<br>(t, 6.0)                | 14.3                | 0.80<br>(t, 6.9)                     | 14.4                |
| 14       | 2.37<br>(dq, 7.3, 7.3)          | 34.6                | 2.52-2.28<br>(m)                    | 36.0                | 2.35<br>(dq, 7.3, 7.3)          | 34.6                | 2.52<br>(sept, 6.8)                  | 36.0                |
| 15       | 1.35<br>(d, 7.3)                | 16.9                | 1.32<br>(d, 6.9)                    | 16.97               | 1.31<br>(d, 7.3)                | 18.1                | 1.36<br>(d, 6.8)                     | 17.1                |
| 16       | 1.32<br>(d, 7.3)                | 18.1                | 1.29<br>(d, 6.9)                    | 17.00               | 1.34<br>(d, 7.3)                | 16.9                | 1.37<br>(d, 6.8)                     | 17.0                |
| 17       | 1.59<br>(s)                     | 28.0                | 1.62<br>(s)                         | 25.5                | 1.83<br>(s)                     | 24.9                | 1.88<br>(s)                          | 25.5                |

**Table S3**  $^1\text{H}$  and  $^{13}\text{C}$  NMR data of natural euvesperin B, and synthetic (4*S*,7*S*)-**12** and (4*S*,7*R*)-**14**

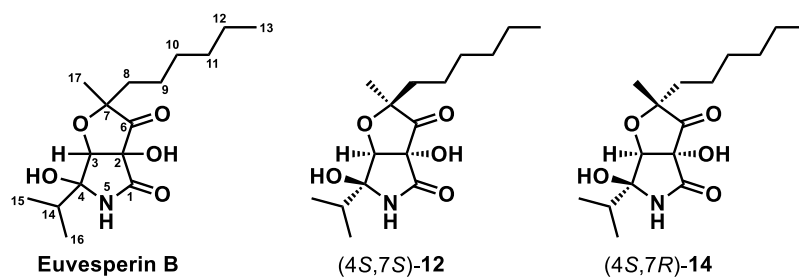

| Position | Natural euvesperin B (isomer-1) |                     | (4 <i>S</i> ,7 <i>S</i> )-12 |                     | Natural euvesperin B (isomer-2) |                     | (4 <i>S</i> ,7 <i>R</i> )-14          |                     |
|----------|---------------------------------|---------------------|------------------------------|---------------------|---------------------------------|---------------------|---------------------------------------|---------------------|
|          | $\delta_{\text{H}}$             | $\delta_{\text{C}}$ | $\delta_{\text{H}}$          | $\delta_{\text{C}}$ | $\delta_{\text{H}}$             | $\delta_{\text{C}}$ | $\delta_{\text{H}}$                   | $\delta_{\text{C}}$ |
| 1        |                                 | 171.9               |                              | 171.9               |                                 | 172.1               |                                       | 172.1               |
| 2        |                                 | 88.1                |                              | 88.2                |                                 | 88.2                |                                       | 88.3                |
| 3        | 5.09 (s)                        | 77.8                | 5.08 (s)                     | 77.9                | 5.07 (s)                        | 77.6                | 5.07 (s)                              | 77.6                |
| 4        |                                 | 91.6                |                              | 91.6                |                                 | 91.4                |                                       | 91.4                |
| 5        | 10.38 (s)                       |                     | 10.37 (br s)                 |                     | 10.31 (br s)                    |                     | 10.30 (br s)                          |                     |
| 6        |                                 | 209.0               |                              | 209.0               |                                 | 209.3               |                                       | 209.3               |
| 7        | -                               | 84.8                |                              | 84.9                | -                               | 84.1                | -                                     | 84.2                |
| 8        | 1.76, 2.00 (br s)               | 42.3                | 1.70-1.60<br>2.06-1.92 (m)   | 42.4                | 2.06, 2.45 (br s)               | 39.6                | 2.16-2.02 (m)<br>2.45 (dt, 4.5, 12.3) | 39.7                |
| 9        | 0.93, 0.99 (m)                  | 29.8                | 1.12-0.85 (m)                | 29.9                | 1.18, 1.28 (m)                  | 30.0                | 1.31-1.08 (m)                         | 30.3                |
| 10       | 1.48, 1.80 (m)                  | 23.7                | 1.55-1.45<br>1.82-1.71 (m)   | 23.7                | 1.40, 1.68 (m)                  | 24.0                | 1.49-1.33<br>1.79-1.62 (m)            | 23.8                |
| 11       | 1.02, 1.14 (m)                  | 32.0                | 1.12-0.85 (m)                | 32.0                | 1.20, 1.24 (m)                  | 32.2                | 1.31-1.08 (m)                         | 32.3                |
| 12       | 1.05, 1.09 (m)                  | 22.9                | 1.12-0.85 (m)                | 23.0                | 1.16, 1.22 (m)                  | 23.0                | 1.31-1.08 (m)                         | 23.1                |
| 13       | 0.71 (t, 8.0)                   | 14.2                | 0.71 (t, 6.8)                | 14.3                | 0.79 (t, 8.0)                   | 14.3                | 0.79 (t, 7.2)                         | 14.4                |
| 14       | 2.67 (dq, 7.4, 7.4)             | 32.4                | 2.66 (sept, 6.8)             | 32.5                | 2.63 (dq, 7.6, 7.6)             | 32.7                | 2.63 (sept, 6.9)                      | 32.7                |
| 15       | 1.19 (d, 7.4)                   | 17.8                | 1.19 (d, 7.2)                | 17.8                | 1.24 (t, 7.6)                   | 17.8                | 1.24 (d, 6.9)                         | 17.9                |
| 16       | 1.43 (d, 7.4)                   | 17.3                | 1.43 (d, 6.8)                | 17.3                | 1.38 (t, 7.6)                   | 17.3                | 1.37 (d, 6.9)                         | 17.4                |
| 17       | 1.85 (s)                        | 24.2                | 1.85 (s)                     | 24.3                | 1.61 (s)                        | 28.2                | 1.60 (s)                              | 28.2                |

C:\Documents and Settings\Thermo\Desktop\kobayashi\19-1H.a1s

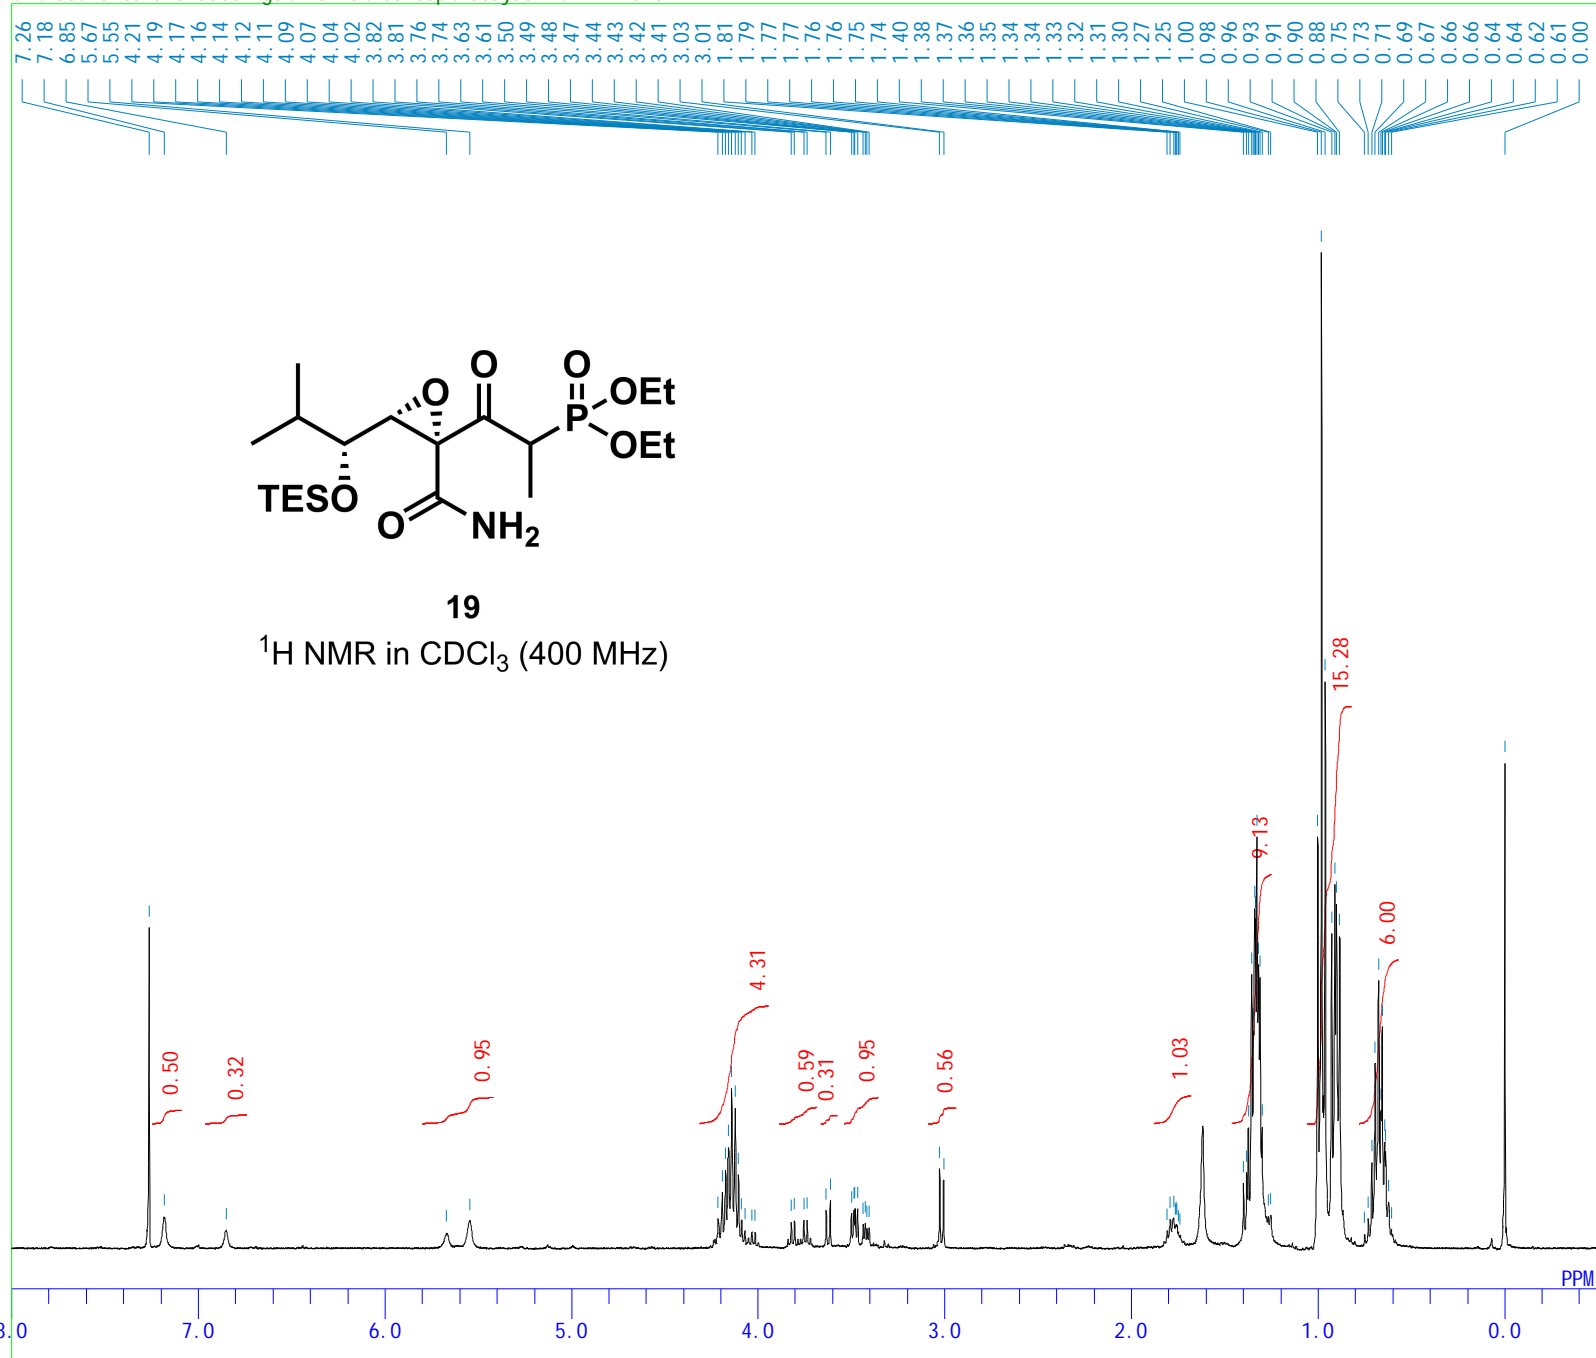

DFILE 19-1H.a1s  
 COMNT 19-1H  
 DATIM Fri Mar 01 17:44:07 2019  
 OBNUC 1H  
 EXMOD NON  
 OBFRO 399.65 MHz  
 OBSET 124.00 KHz  
 OBFIN 10500.00 Hz  
 POINT 16384  
 FREQU 7992.01 Hz  
 SCANS 8  
 ACQTM 2.0500 sec  
 PD 4.9500 sec  
 PW1 5.80 usec  
 IRNUC 1H  
 CTEMP 22.2 c  
 SLVNT CDCL3  
 EXREF 0.00 ppm  
 BF 0.12 Hz  
 RGA1N 17

C:\Documents and Settings\Thermo\Desktop\kobayashi\19-13C.als

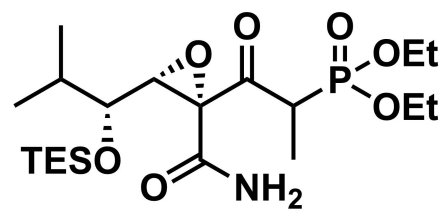

19

 $^{13}\text{C}$  NMR in  $\text{CDCl}_3$  (100 MHz)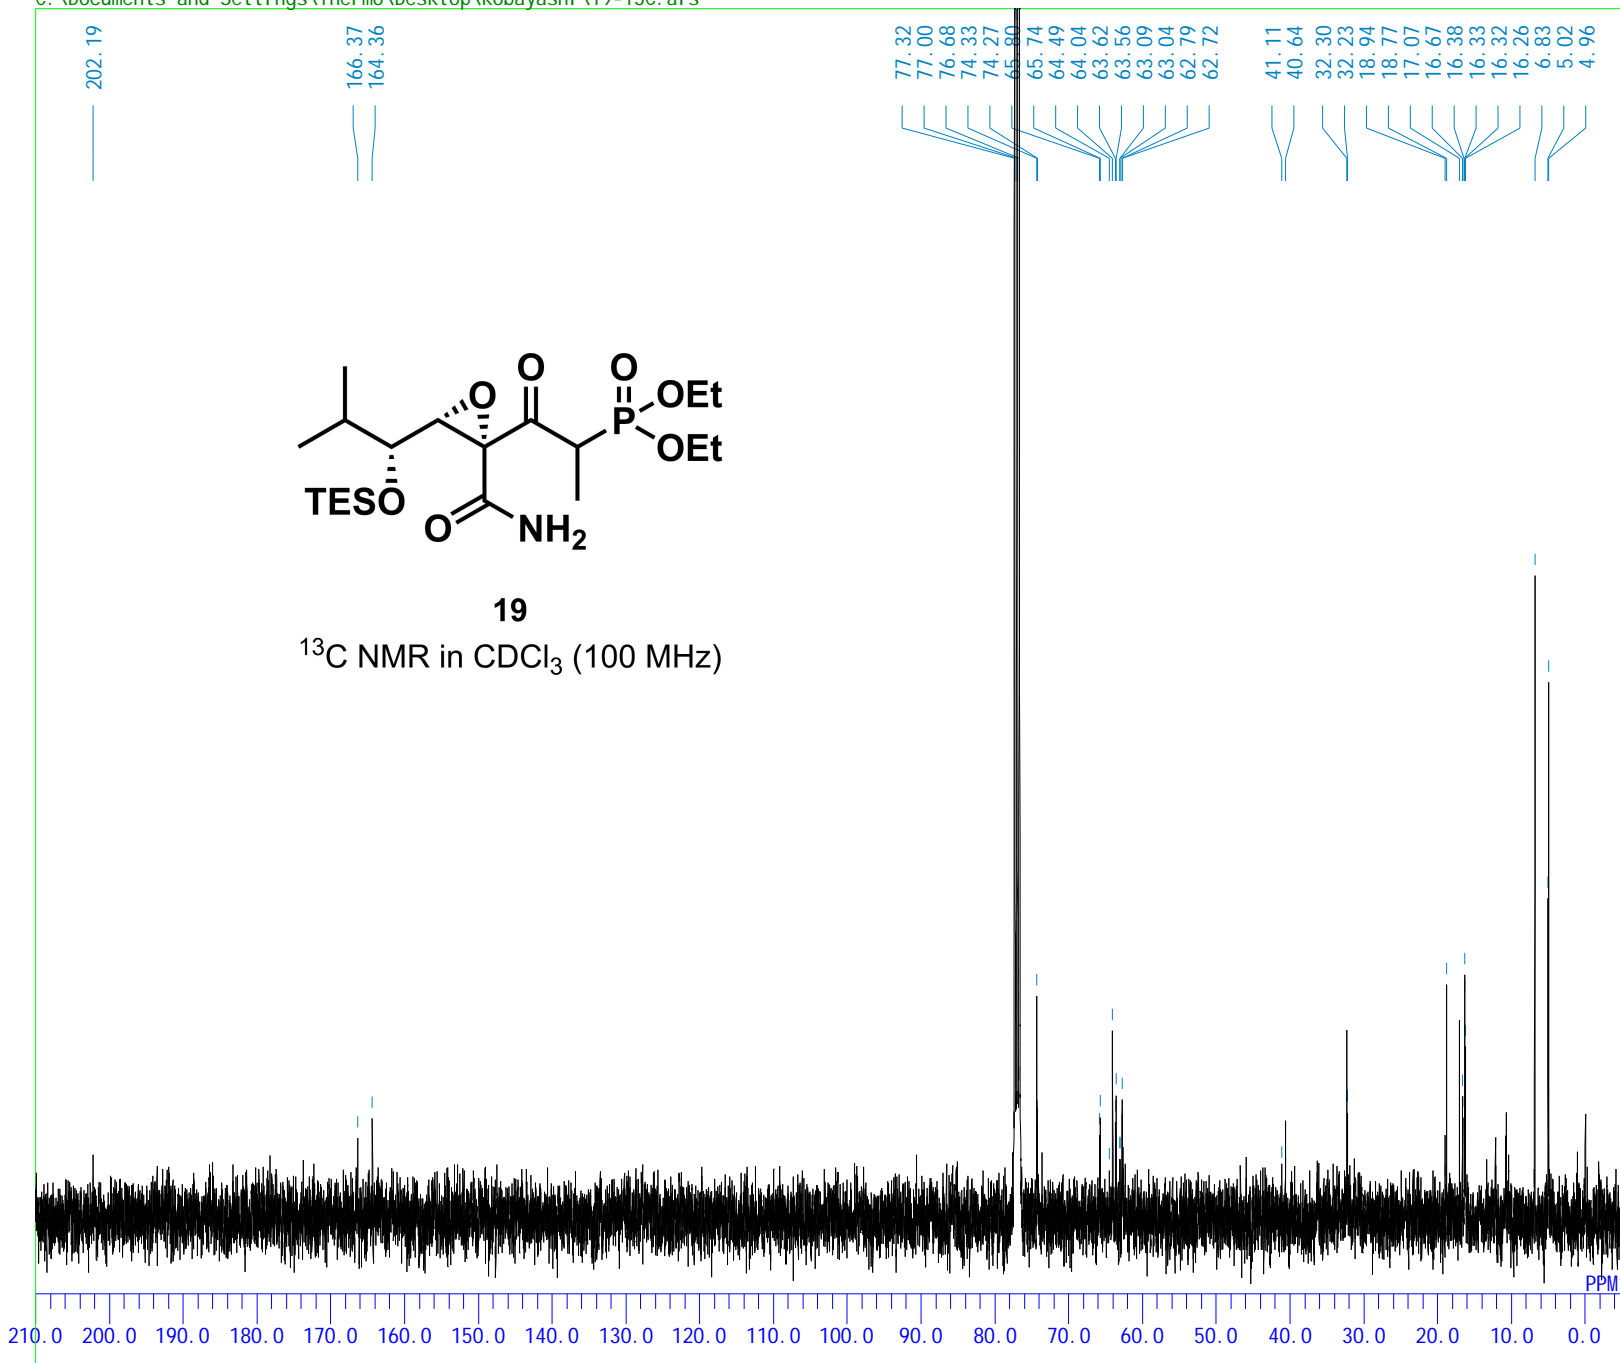

DFILE 19-13C.als  
 COMNT 19-13C  
 DATIM Fri Mar 01 18:56:37 2019  
 OBNUC 13C  
 EXMOD BCM  
 OBFRO 100.40 MHz  
 OBSET 125.00 KHz  
 OBFIN 10500.00 Hz  
 POINT 32768  
 FREQU 27118.64 Hz  
 SCANS 1000  
 ACQTM 1.2083 sec  
 PD 1.7920 sec  
 PW1 5.80 usec  
 IRNUC 1H  
 CTEMP 22.8 c  
 SLVNT CDCL3  
 EXREF 77.00 ppm  
 BF 1.20 Hz  
 RGAIN 24

C:\Documents and Settings\Thermo\Desktop\kobayashi\22-1H.a1s

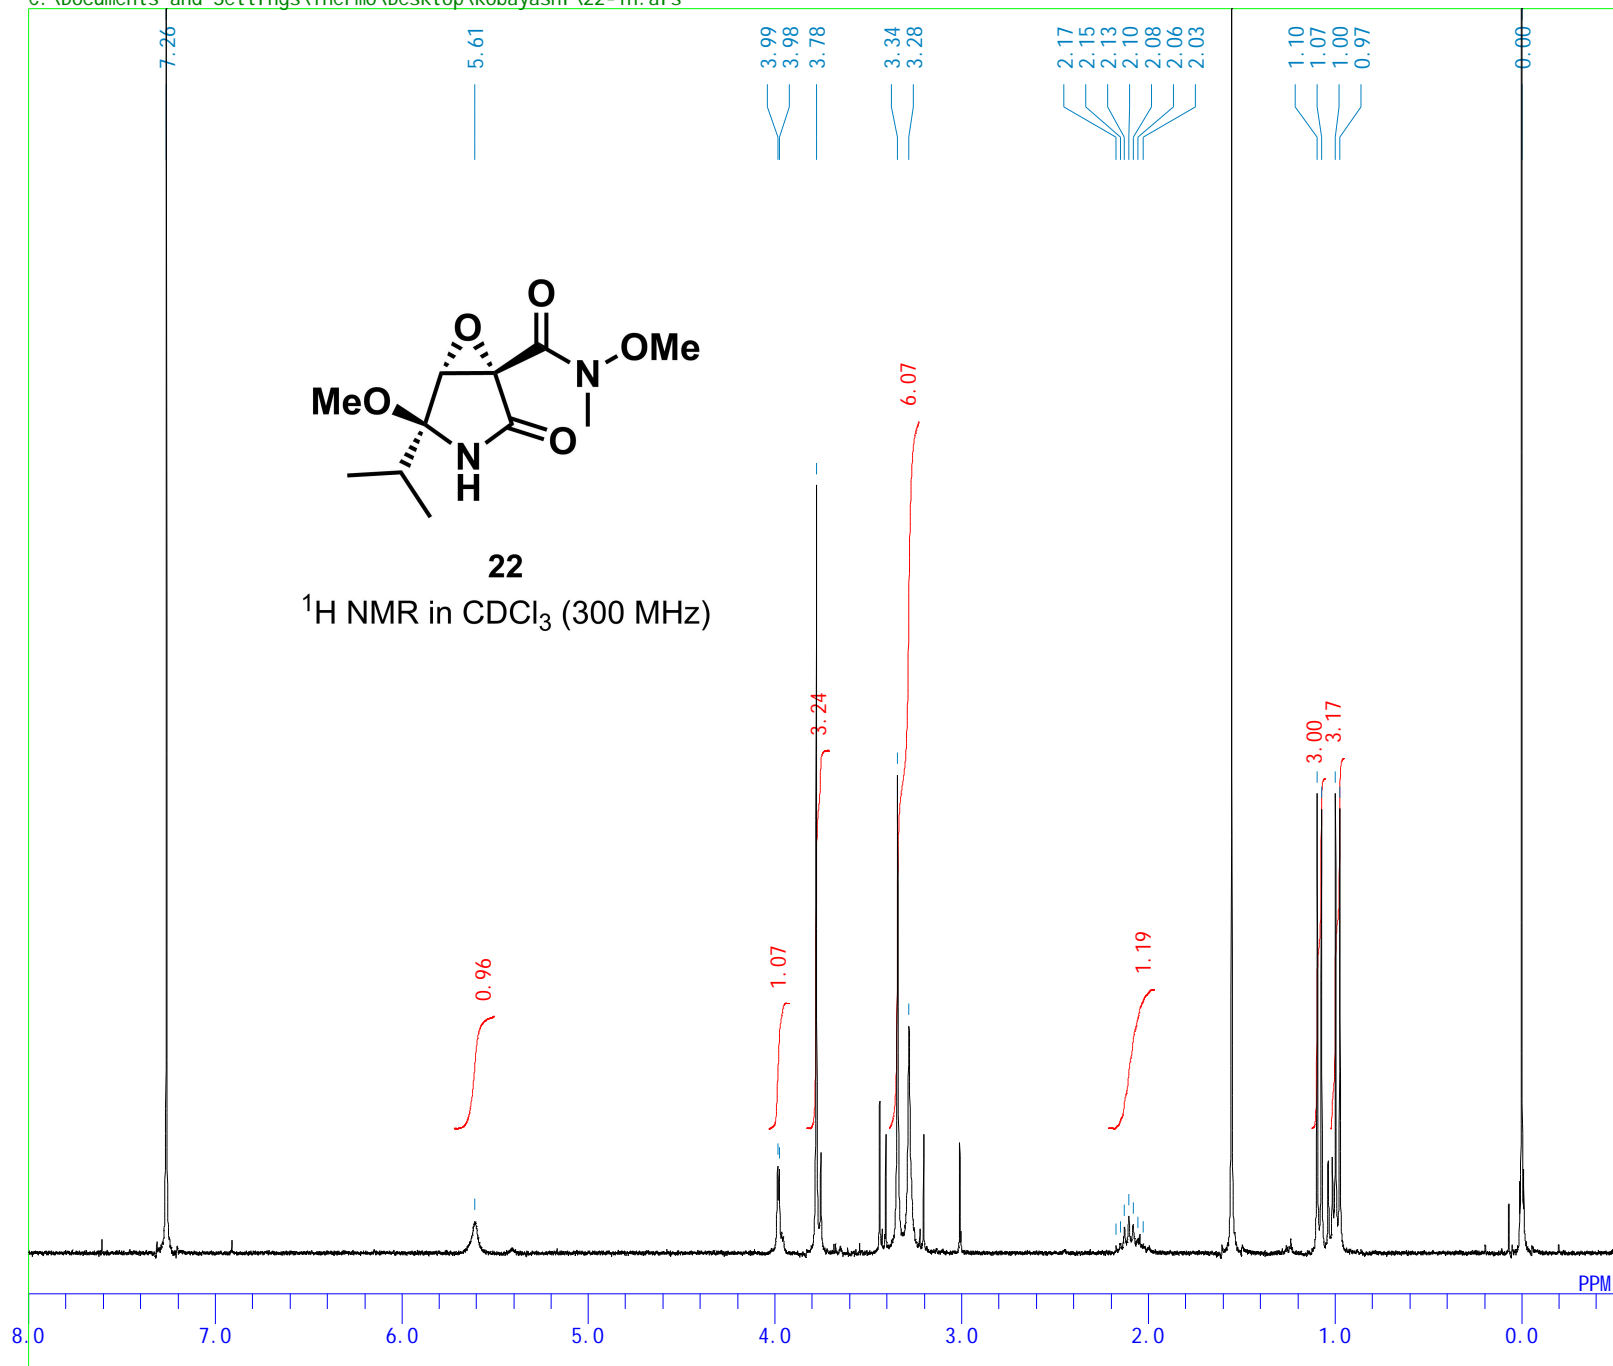

DFILE 22-1H.a1s  
 COMNT 22-1H  
 DATIM Sat Nov 25 13:37:05 2017  
 OBNUC 1H  
 EXMOD NON  
 OBFRO 300.40 MHz  
 OBSET 130.00 KHz  
 OBFIN 1150.00 Hz  
 POINT 32768  
 FREQU 6006.01 Hz  
 SCANS 16  
 ACQTM 5.4559 sec  
 PD 1.5440 sec  
 PW1 5.30 usec  
 IRNUC 1H  
 CTEMP 25.2 c  
 SLVNT CDCL3  
 EXREF 0.00 ppm  
 BF 0.12 Hz  
 RGAIN 23



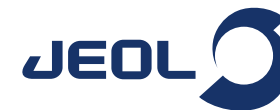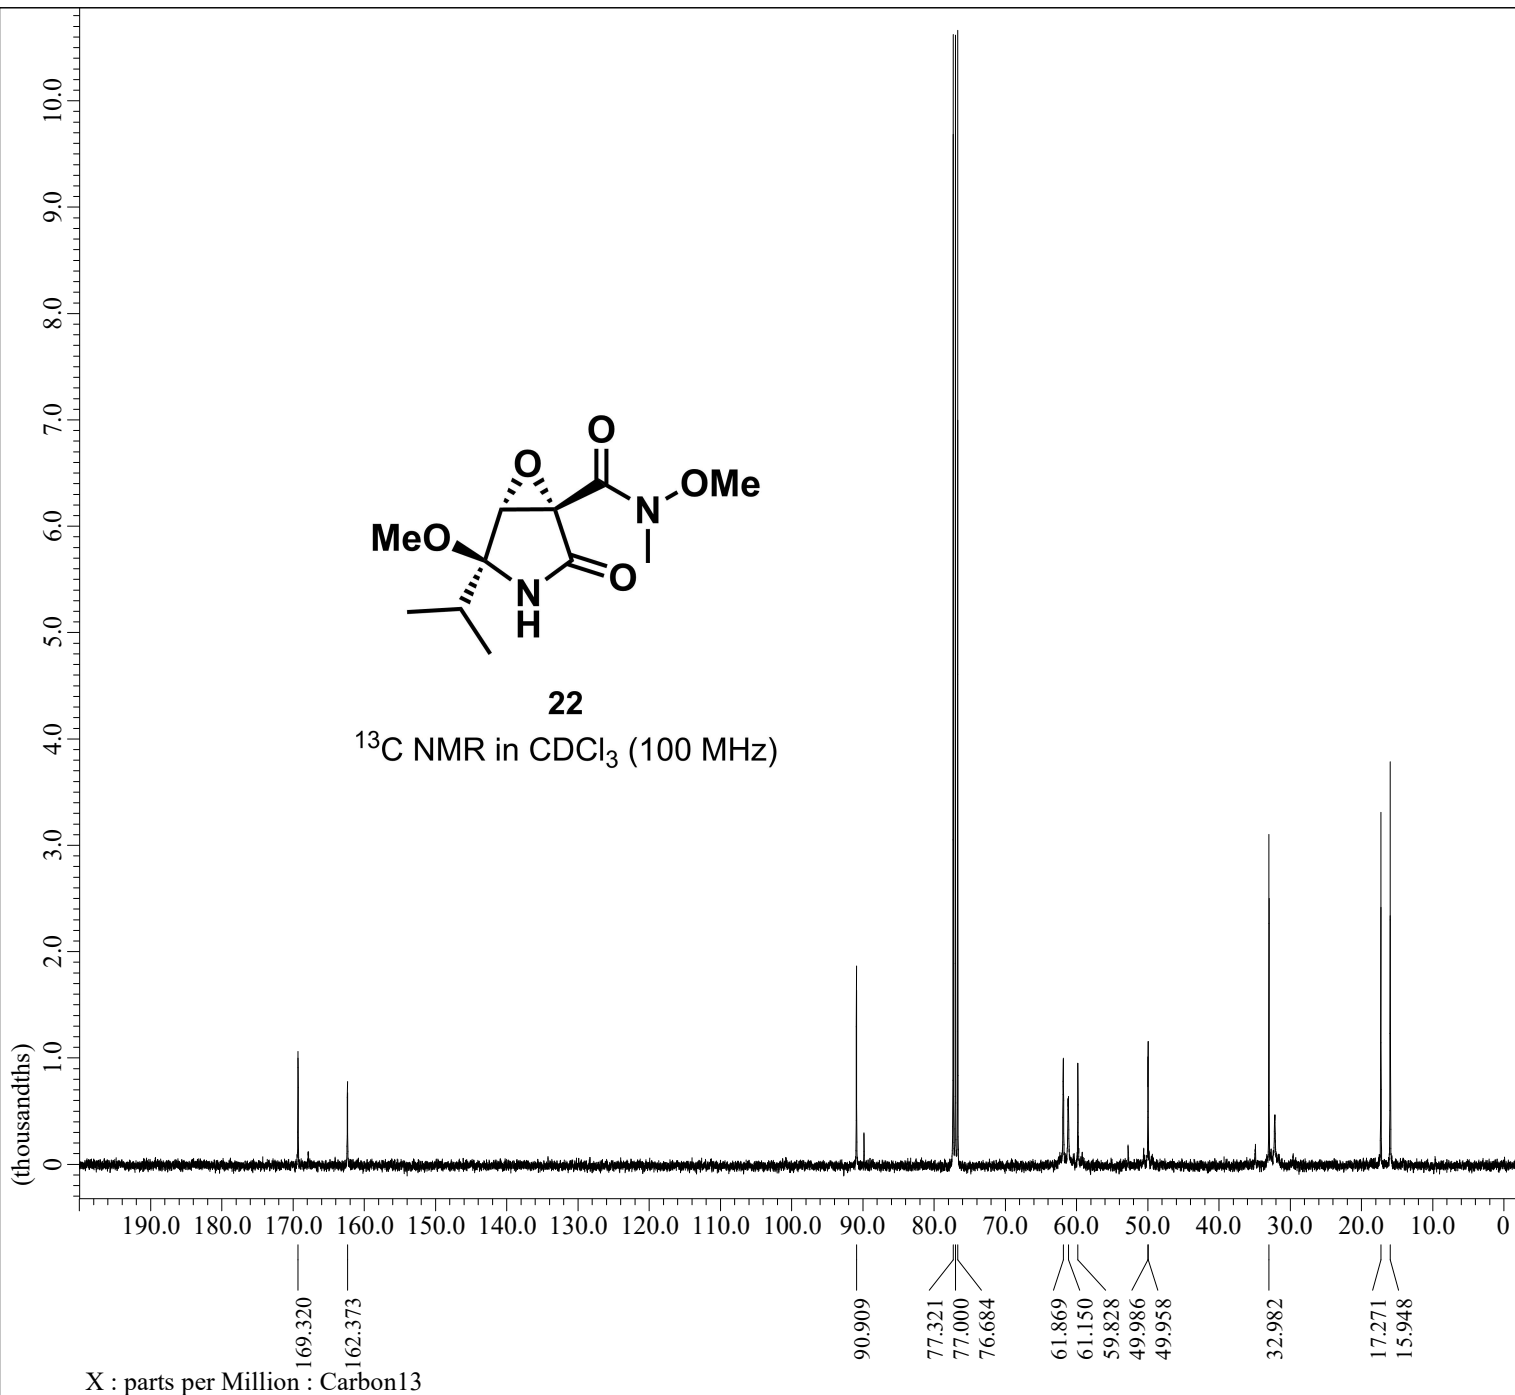

Filename = MMK17-11-2-2\_Carbo  
Author = delta  
Experiment = carbon.jxp  
Sample\_Id = MMK17-11-2-2  
Solvent = CHLOROFORM-D  
Actual\_Start\_Time = 7-AUG-2024 15:06:  
Revision\_Time = 7-AUG-2024 16:15:

Data\_Format = 1D COMPLEX  
Dim\_Size = 52429  
X\_Domain = Carbon13  
Dim\_Title = Carbon13  
Dim\_Units = [ppm]  
Dimensions = X  
Site = ECZL400  
Spectrometer = NM-70010S4L1

Field\_Strength = 9.389766[T] (400[M]  
X\_Acq\_Duration = 0.9952272[s]  
X\_Domain = Carbon13  
X\_Freq = 100.52530333[MHz]  
X\_Offset = 100[ppm]  
X\_Points = 31415  
X\_Prescans = 4  
X\_Resolution = 1.00479569[Hz]  
X\_Sweep = 31.56565657[kHz]  
X\_Sweep\_Clippped = 25.25252525[kHz]  
Irr\_Domain = Proton  
Irr\_Freq = 399.78219838[MHz]  
Irr\_Offset = 5[ppm]  
Tri\_Domain = Carbon13  
Tri\_Freq = 100.52530333[MHz]  
Tri\_Offset = 5[ppm]  
Blanking = 2.0[us]  
Clipped = TRUE  
Scans = 1040  
Total\_Scans = 1040

Relaxation\_Delay = 2[s]  
Recvr\_Gain = 50  
Temp\_Get = 21.6[dC]  
X\_90\_Width = 11.03[us]  
X\_Acq\_Time = 0.9952272[s]  
X\_Angle = 30[deg]  
X\_Atn = 9[dB]  
X\_Data\_Points = 32768  
X\_Points\_Default = 22547  
X\_Points\_Input = 25132  
X\_Pulse = 3.67666667[us]  
X\_Sweep\_Input = 251.0[ppm]  
Irr\_Atn\_Dec = 28.666[dB]  
Irr\_Atn\_Dec\_Calc = 28.666[dB]  
Irr\_Atn\_Noie = 28.666[dB]  
Irr\_Bandwidth = 4.7826087[kHz]  
Irr\_Bandwidth\_Ppm = 11.96303566[ppm]  
Irr\_Corresp\_Pw90 = 0.115[ms]  
Irr\_Dec\_Freq = 399.78219838[MHz]  
Irr\_Decoupling = TRUE  
Irr\_Noie = TRUE  
Irr\_Noise = WALTZ  
Irr\_Offset\_Default = 5[ppm]

C:\Documents and Settings\Thermo\Desktop\kobayashi\26-1H.a1s

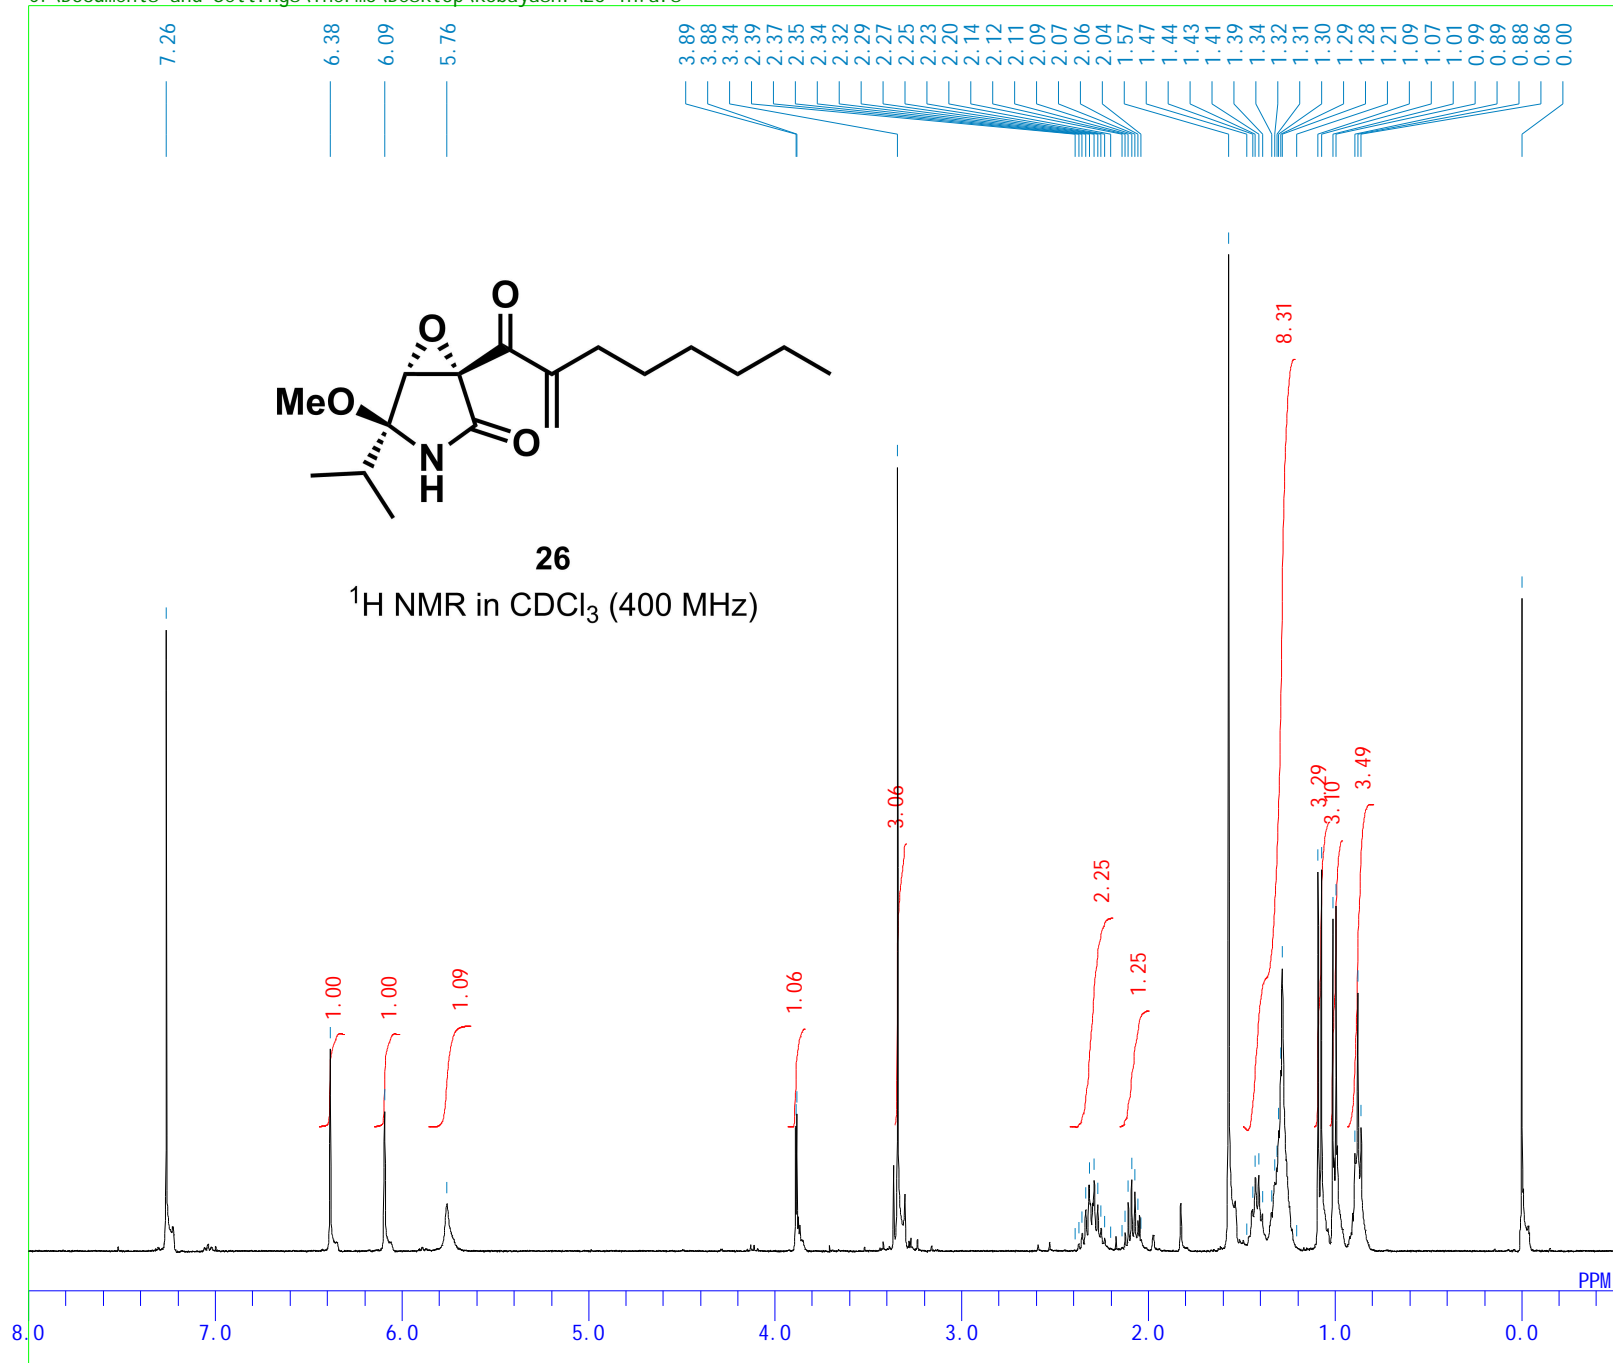

DFILE 26-1H.a1s  
 COMNT 26-1H  
 DATIM Sat Apr 07 10:22:32 2018  
 OBNUC 1H  
 EXMOD NON  
 OBFRO 399.65 MHz  
 OBSET 124.00 KHz  
 OBFIN 10500.00 Hz  
 POINT 16384  
 FREQU 7992.01 Hz  
 SCANS 26  
 ACQTM 2.0500 sec  
 PD 4.9500 sec  
 PW1 5.80 usec  
 IRNUC 1H  
 CTEMP 21.5 c  
 SLVNT CDCL3  
 EXREF 0.00 ppm  
 BF 0.12 Hz  
 RGAIN 20

C:\Documents and Settings\Thermo\Desktop\kobayashi\26-13C.als

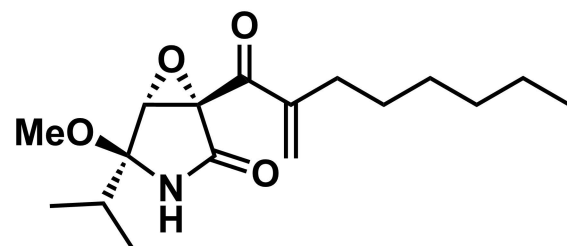

26

 $^{13}\text{C}$  NMR in  $\text{CDCl}_3$  (100 MHz)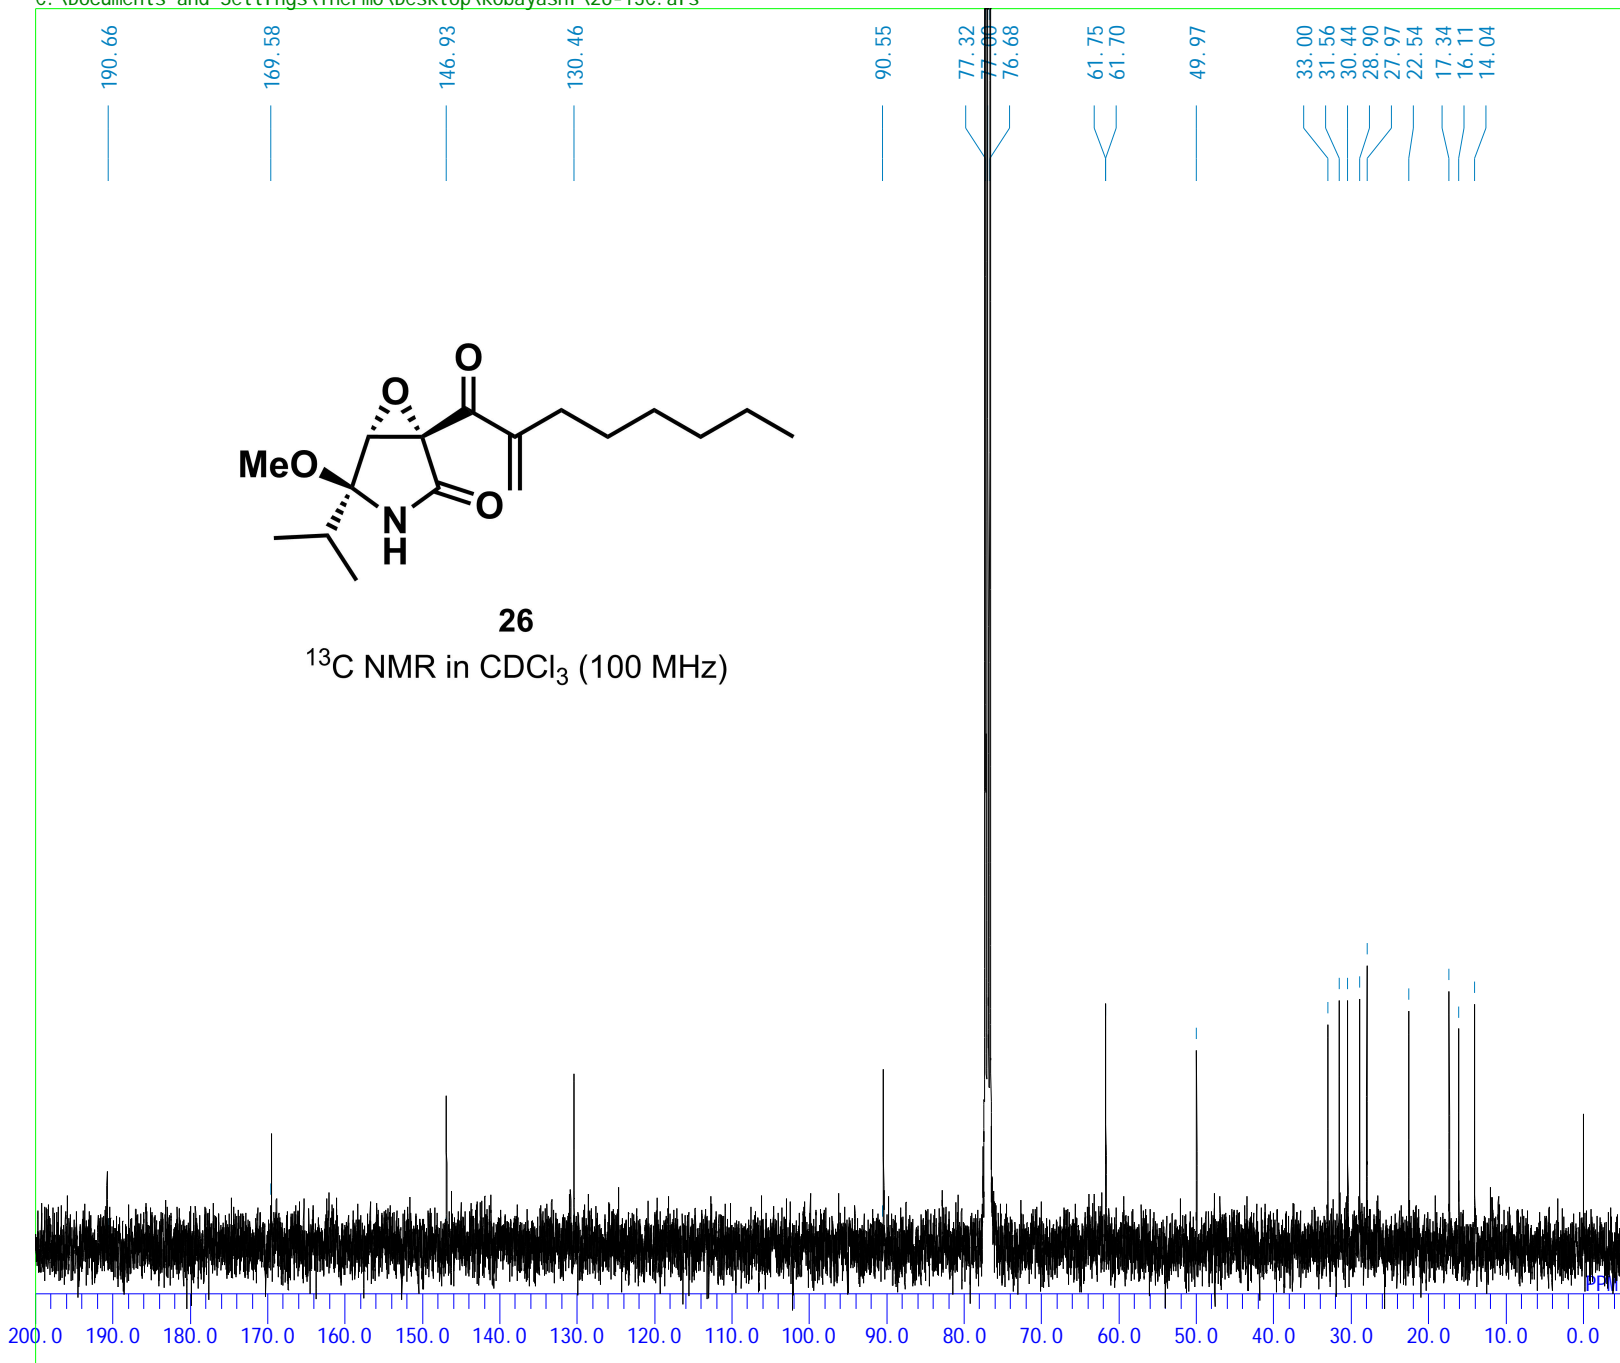

DFILE 26-13C.als  
 COMNT 26-13C  
 DATIM Sat Apr 07 13:29:08 2018  
 OBNUC 13C  
 EXMOD BCM  
 OBFRO 100.40 MHz  
 OBSET 125.00 KHz  
 OBFIN 10500.00 Hz  
 POINT 32768  
 FREQU 27118.64 Hz  
 SCANS 3636  
 ACQTM 1.2083 sec  
 PD 1.7920 sec  
 PW1 5.80 usec  
 IRNUC 1H  
 CTEMP 23.4 c  
 SLVNT CDCL3  
 EXREF 77.00 ppm  
 BF 1.20 Hz  
 RGAIN 25

C:\Documents and Settings\Thermo\Desktop\kobayashi\ (6S)-28-1H.als

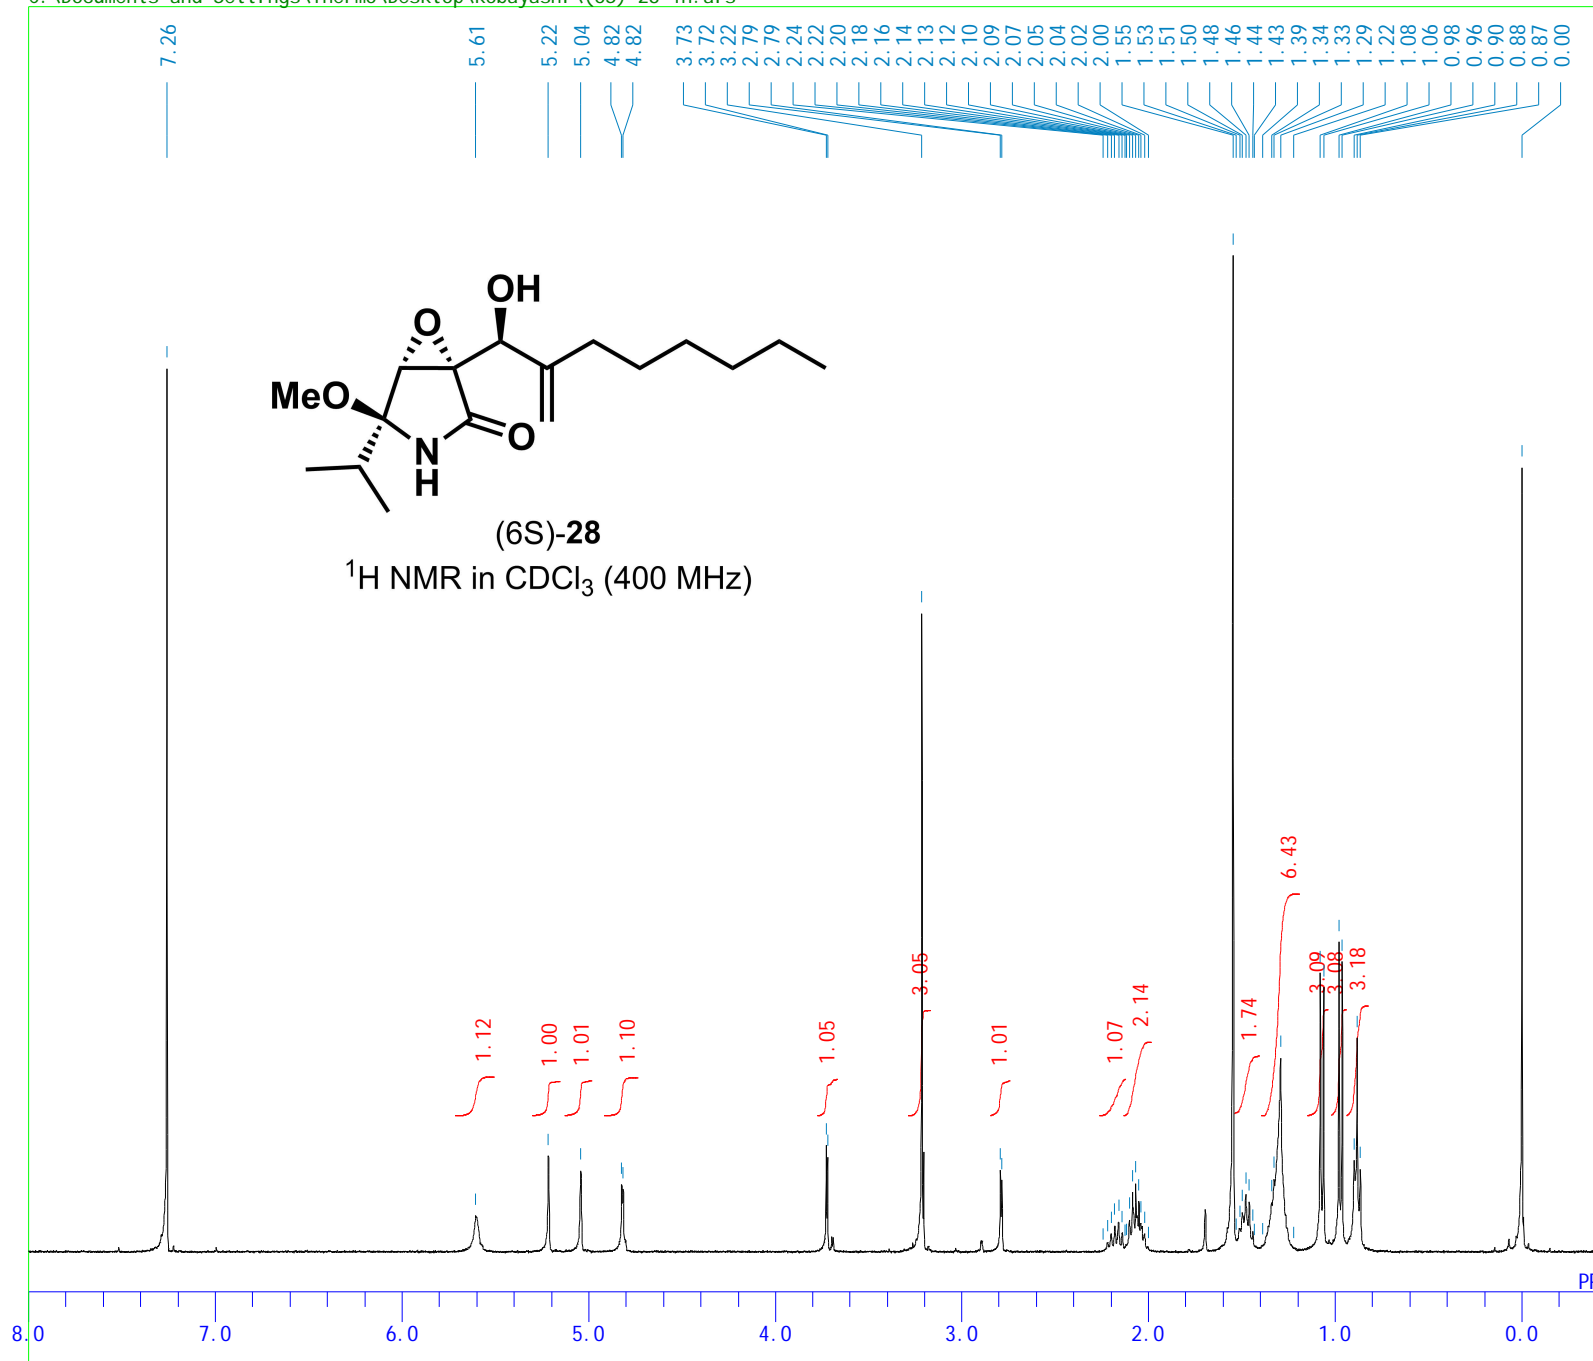

DFILE (6S)-28-1H.als  
COMNT (6S)-28-1H  
DATIM Mon Apr 09 12:49:24 2018  
OBNUC 1H  
EXMOD NON  
OBFRQ 399.65 MHz  
OBSET 124.00 KHz  
OBFIN 10500.00 Hz  
POINT 16384  
FREQU 7992.01 Hz  
SCANS 27  
ACQTM 2.0500 sec  
PD 4.9500 sec  
PW1 5.80 usec  
IRNUC 1H  
CTEMP 24.8 c  
SLVNT CDCL3  
EXREF 0.00 ppm  
BF 0.12 Hz  
RGAIN 22

C:\Documents and Settings\Thermo\Desktop\kobayashi\ (6S)-28-13C.als

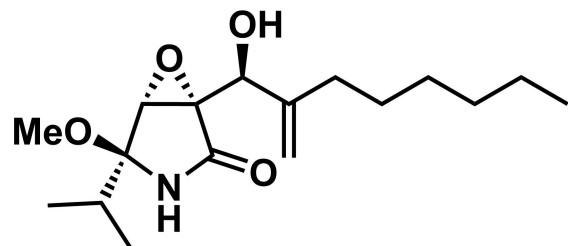

(6S)-28

<sup>13</sup>C NMR in CDCl<sub>3</sub> (100 MHz)

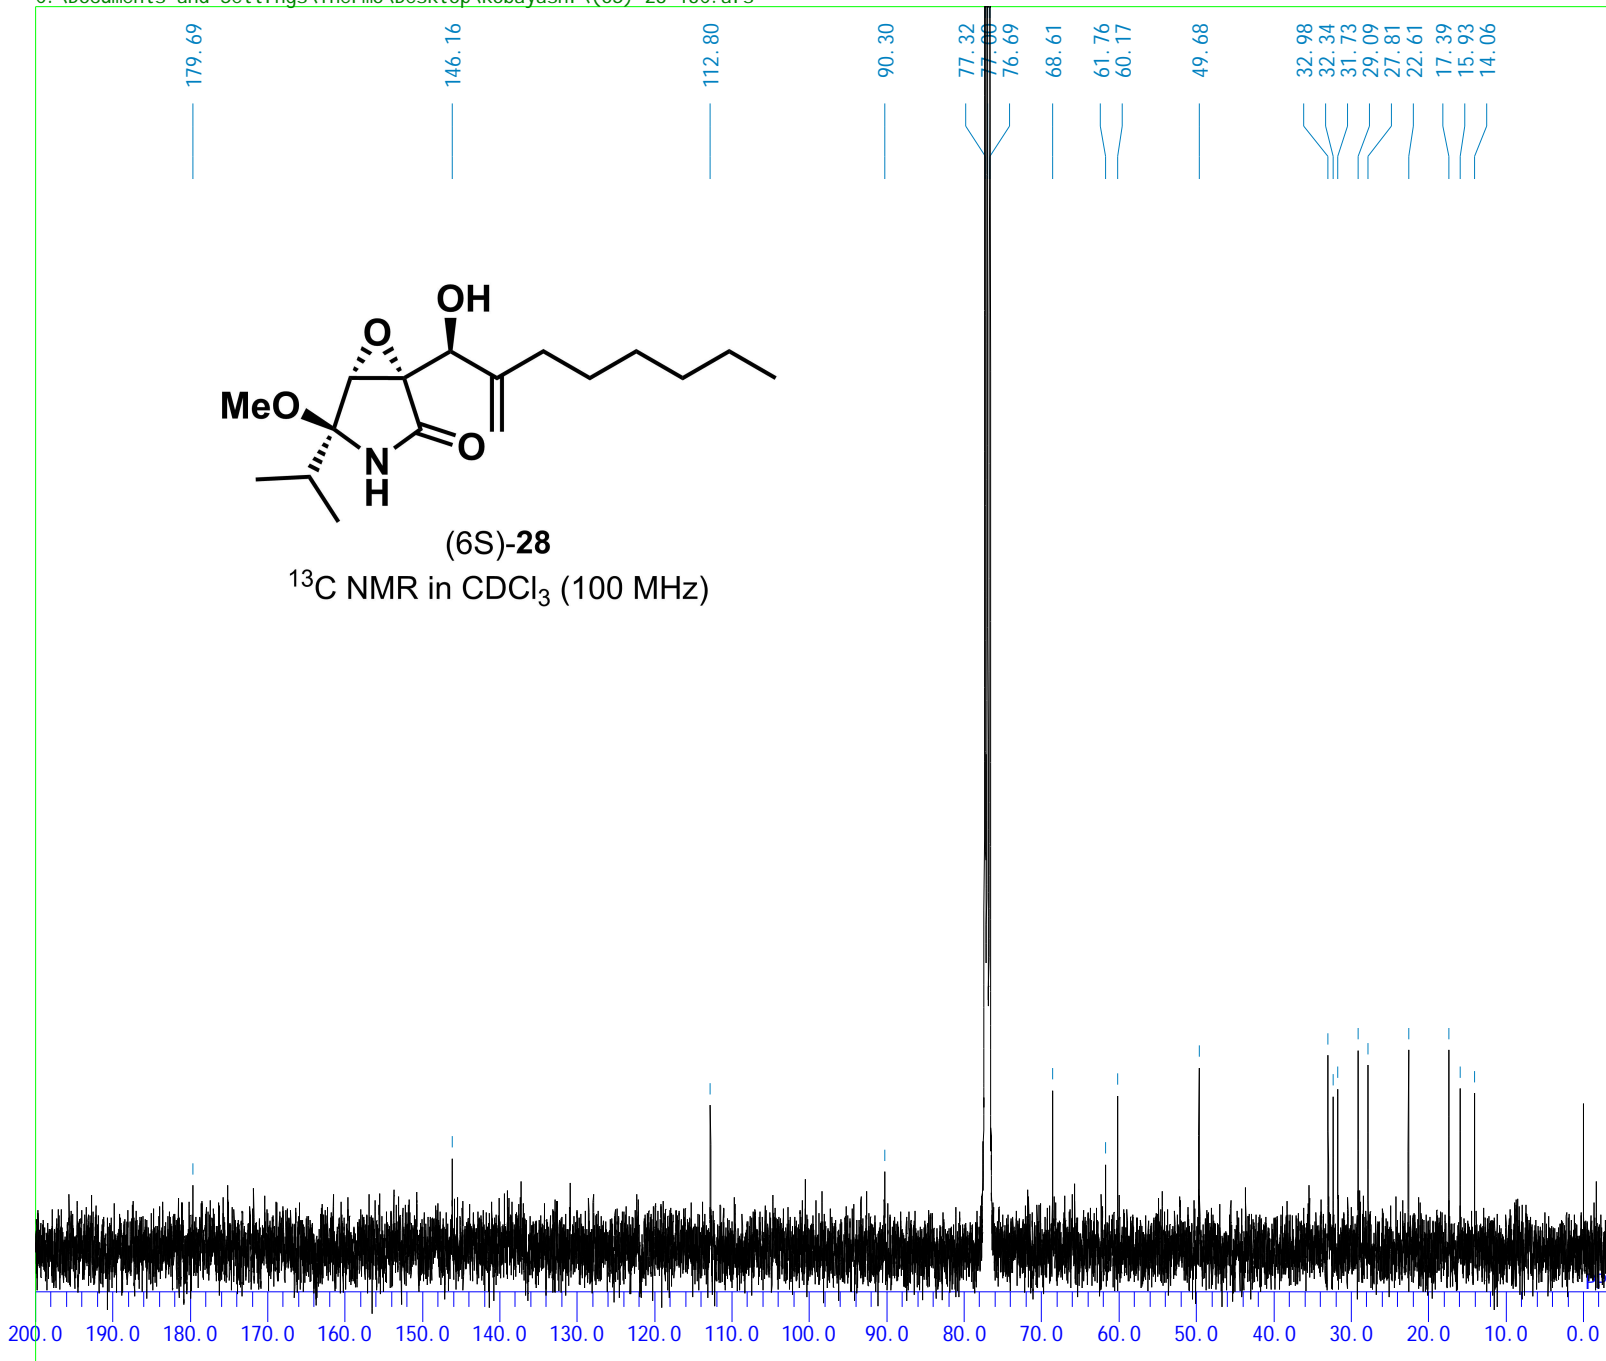

DFILE (6S)-28-13C.als  
COMNT (6S)-28-13C  
DATIM Mon Apr 09 15:42:32 2018  
OBNUC 13C  
EXMOD BCM  
OBFRO 100.40 MHz  
OBSET 125.00 KHz  
OBFIN 10500.00 Hz  
POINT 32768  
FREQU 27118.64 Hz  
SCANS 3303  
ACQTM 1.2083 sec  
PD 1.7920 sec  
PW1 5.80 usec  
IRNUC 1H  
CTEMP 24.5 c  
SLVNT CDCL3  
EXREF 77.00 ppm  
BF 1.20 Hz  
RGAIN 25

C:\Documents and Settings\Thermo\Desktop\kobayashi\S1-1H.a1s

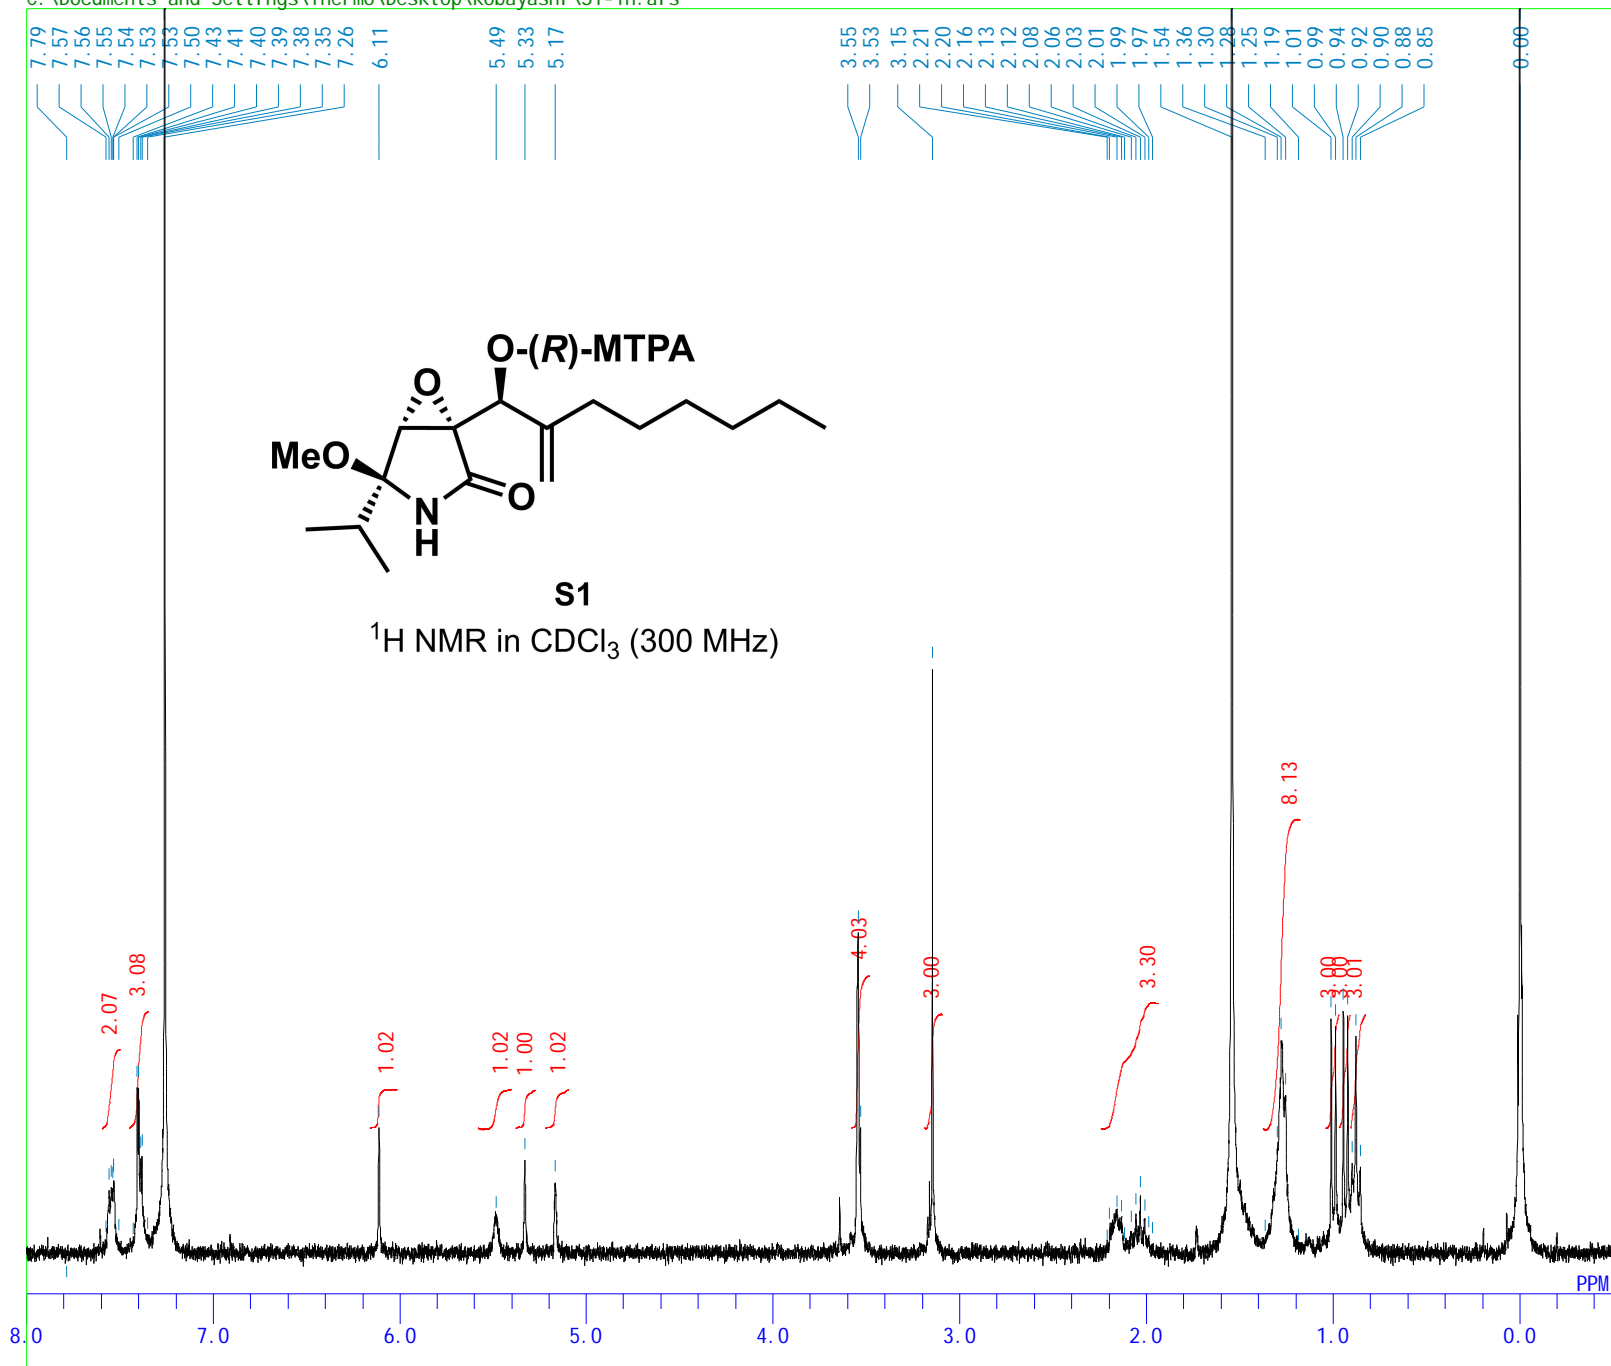

DFILE S1-1H.a1s  
 COMNT S1-1H  
 DATIM Thu Nov 15 20:18:47 2018  
 OBNUC 1H  
 EXMOD NON  
 OBFRO 300.40 MHz  
 OBSET 130.00 KHz  
 OBFIN 1150.00 Hz  
 POINT 32768  
 FREQU 6006.01 Hz  
 SCANS 16  
 ACQTM 5.4559 sec  
 PD 1.5440 sec  
 PW1 5.20 usec  
 IRNUC 1H  
 CTEMP 24.9 c  
 SLVNT CDCL3  
 EXREF 0.00 ppm  
 BF 0.12 Hz  
 RGAIN 24

C:\Documents and Settings\Thermo\Desktop\kobayashi\S2-1H.a1s

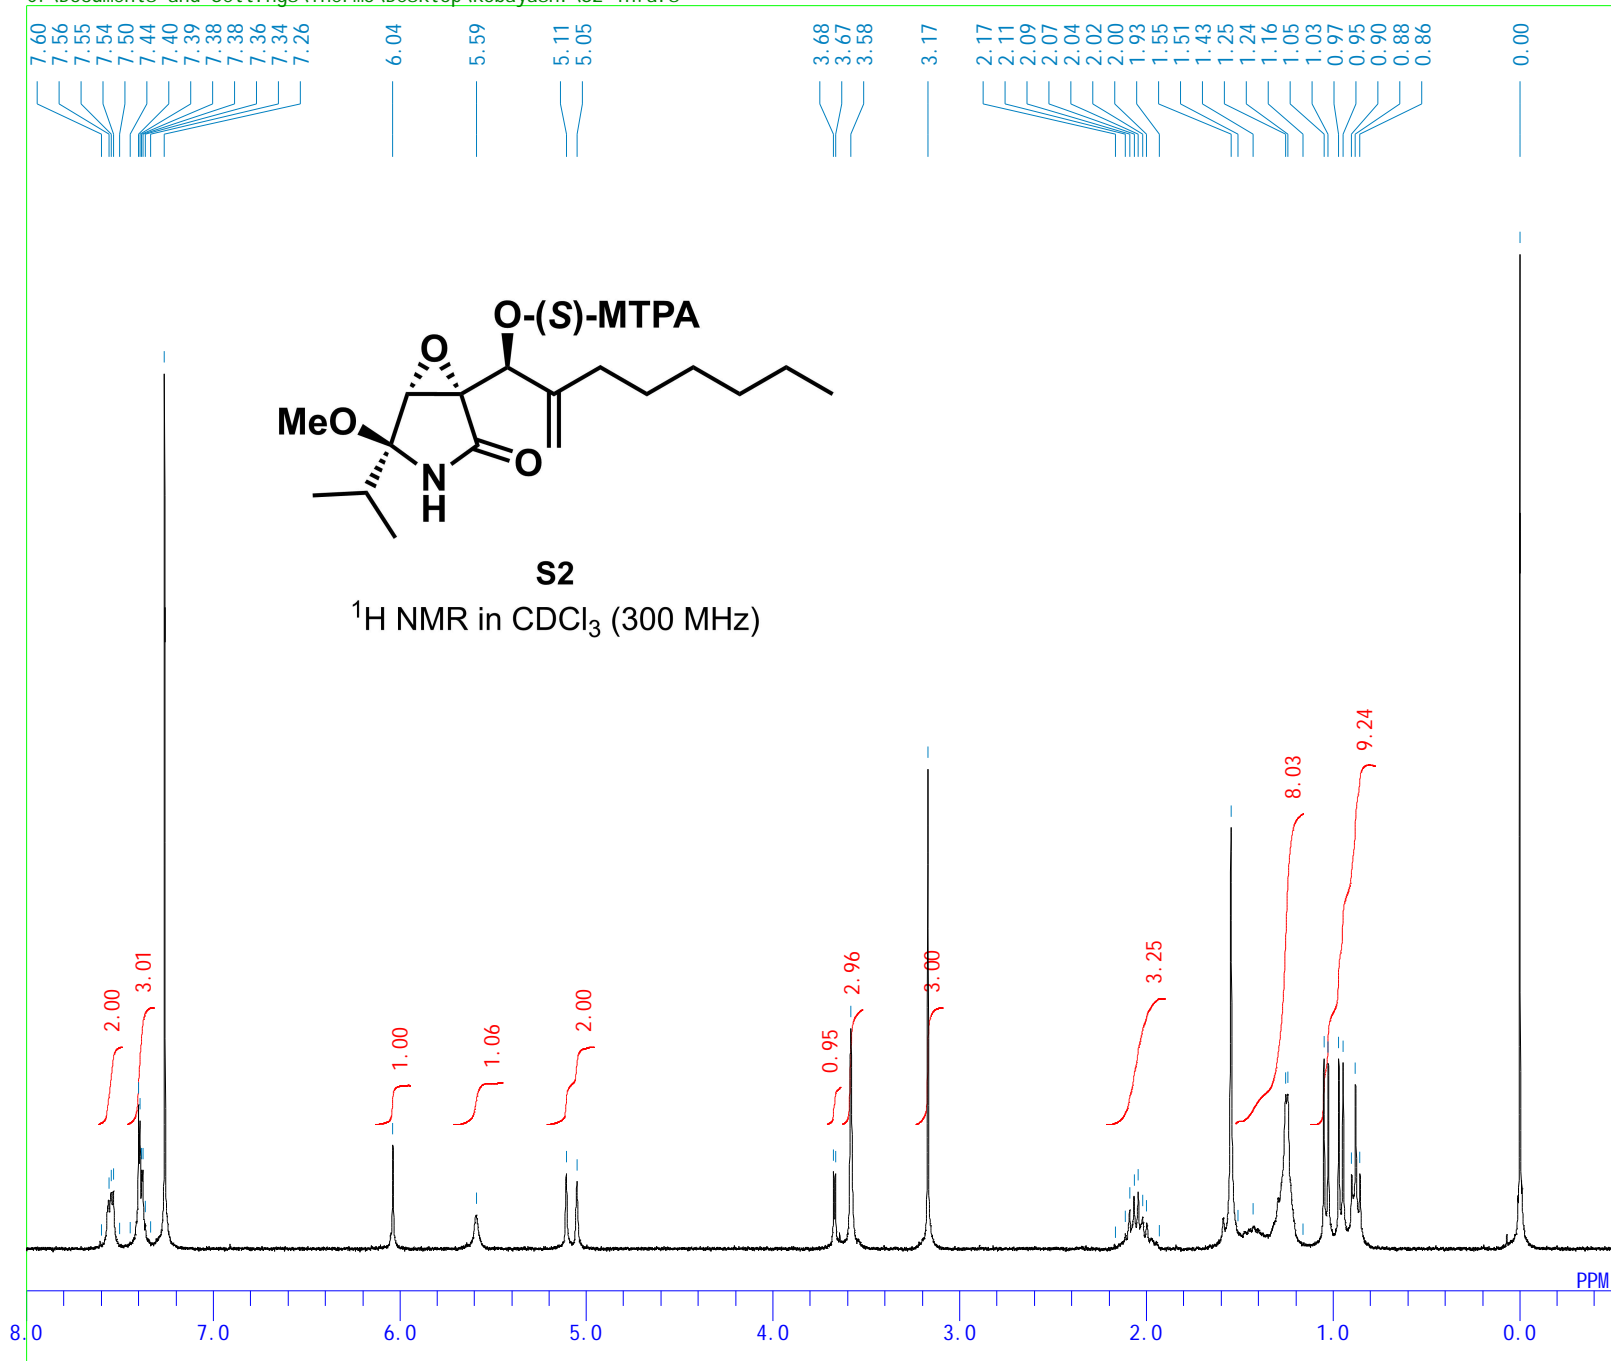

DFILE S2-1H.a1s  
 COMNT S2-1H  
 DATIM Thu Nov 15 20:24:53 2018  
 OBNUC 1H  
 EXMOD NON  
 OBFRO 300.40 MHz  
 OBSET 130.00 KHz  
 OBFIN 1150.00 Hz  
 POINT 32768  
 FREQU 6006.01 Hz  
 SCANS 16  
 ACQTM 5.4559 sec  
 PD 1.5440 sec  
 PW1 5.20 usec  
 IRNUC 1H  
 CTEMP 25.5 c  
 SLVNT CDCL3  
 EXREF 0.00 ppm  
 BF 0.12 Hz  
 RGAIN 22

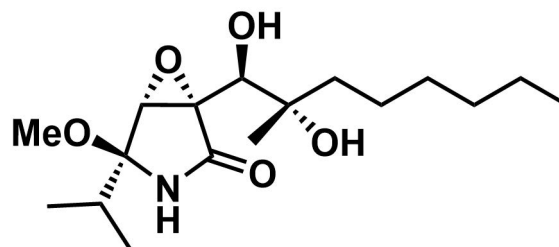

(7S)-29

<sup>1</sup>H NMR in CDCl<sub>3</sub> (400 MHz)

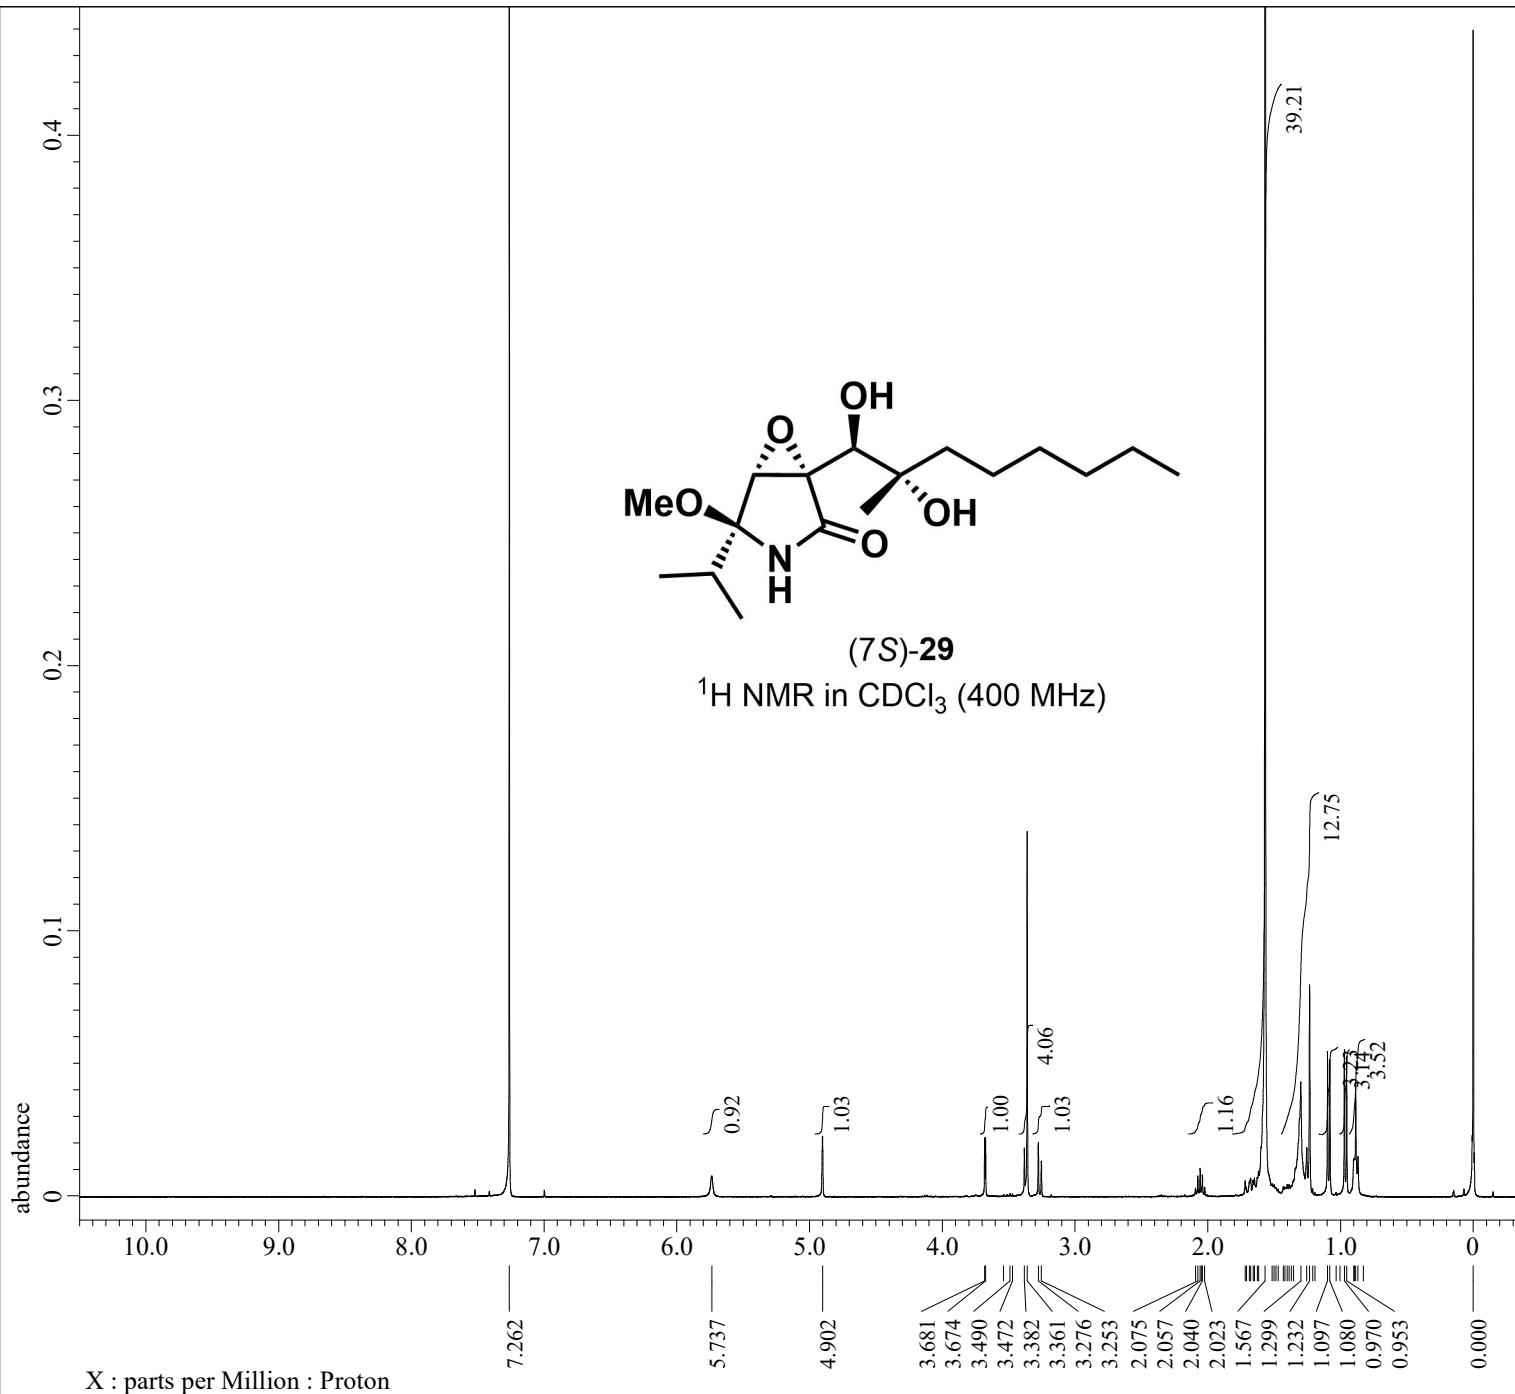

Filename = MMK17-15\_Proton-1-  
 Author = delta  
 Experiment = proton.jxp  
 Sample\_Id = MMK17-15  
 Solvent = CHLOROFORM-D  
 Actual\_Start\_Time = 9-AUG-2024 20:16:  
 Revision\_Time = 14-AUG-2024 10:32:

Data\_Format = 1D COMPLEX  
 Dim\_Size = 26214  
 X\_Domain = Proton  
 Dim\_Title = Proton  
 Dim\_Units = [ppm]  
 Dimensions = X  
 Site = ECZL400  
 Spectrometer = NM-70010S4L1

Field\_Strength = 9.389766[T] (400[M]  
 X\_Acq\_Duration = 2.0470176[s]  
 X\_Domain = Proton  
 X\_Freq = 399.78219838[MHz]  
 X\_Offset = 5[ppm]  
 X\_Points = 15368  
 X\_Prescans = 1  
 X\_Resolution = 0.48851558[Hz]  
 X\_Sweep = 7.50750751[kHz]  
 X\_Sweep\_Clippped = 6.00600601[kHz]  
 Irr\_Domain = Proton  
 Irr\_Freq = 399.78219838[MHz]  
 Irr\_Offset = 5[ppm]  
 Tri\_Domain = Proton  
 Tri\_Freq = 399.78219838[MHz]  
 Tri\_Offset = 5[ppm]  
 Blanking = 2.0[us]  
 Clipped = FALSE  
 Scans = 80  
 Total\_Scans = 80

Relaxation\_Delay = 5[s]  
 Recvr\_Gain = 66  
 Temp\_Get = 21.7[dC]  
 X\_90\_Width = 6.65[us]  
 X\_Acq\_Time = 2.0470176[s]  
 X\_Angle = 45[deg]  
 X\_Atn = 4[dB]  
 X\_Data\_Points = 65536  
 X\_Points\_Default = 23933  
 X\_Points\_Input = 12294  
 X\_Pulse = 3.325[us]  
 X\_Sweep\_Input = 15[ppm]  
 Irr\_Mode = Off  
 Tri\_Mode = Off  
 Dante\_Loop = 500  
 Dante\_Presat = FALSE  
 Decimation\_Rate = 0  
 Default\_X\_Resolution = 0.3137[Hz]  
 Experiment\_Path = C:\Program Files\J  
 Initial\_Wait = 1[s]  
 Phase = {0, 90, 270, 180,  
 Presat\_Time = 5[s]  
 Presat\_Time\_Flag = FALSE

X : parts per Million : Proton



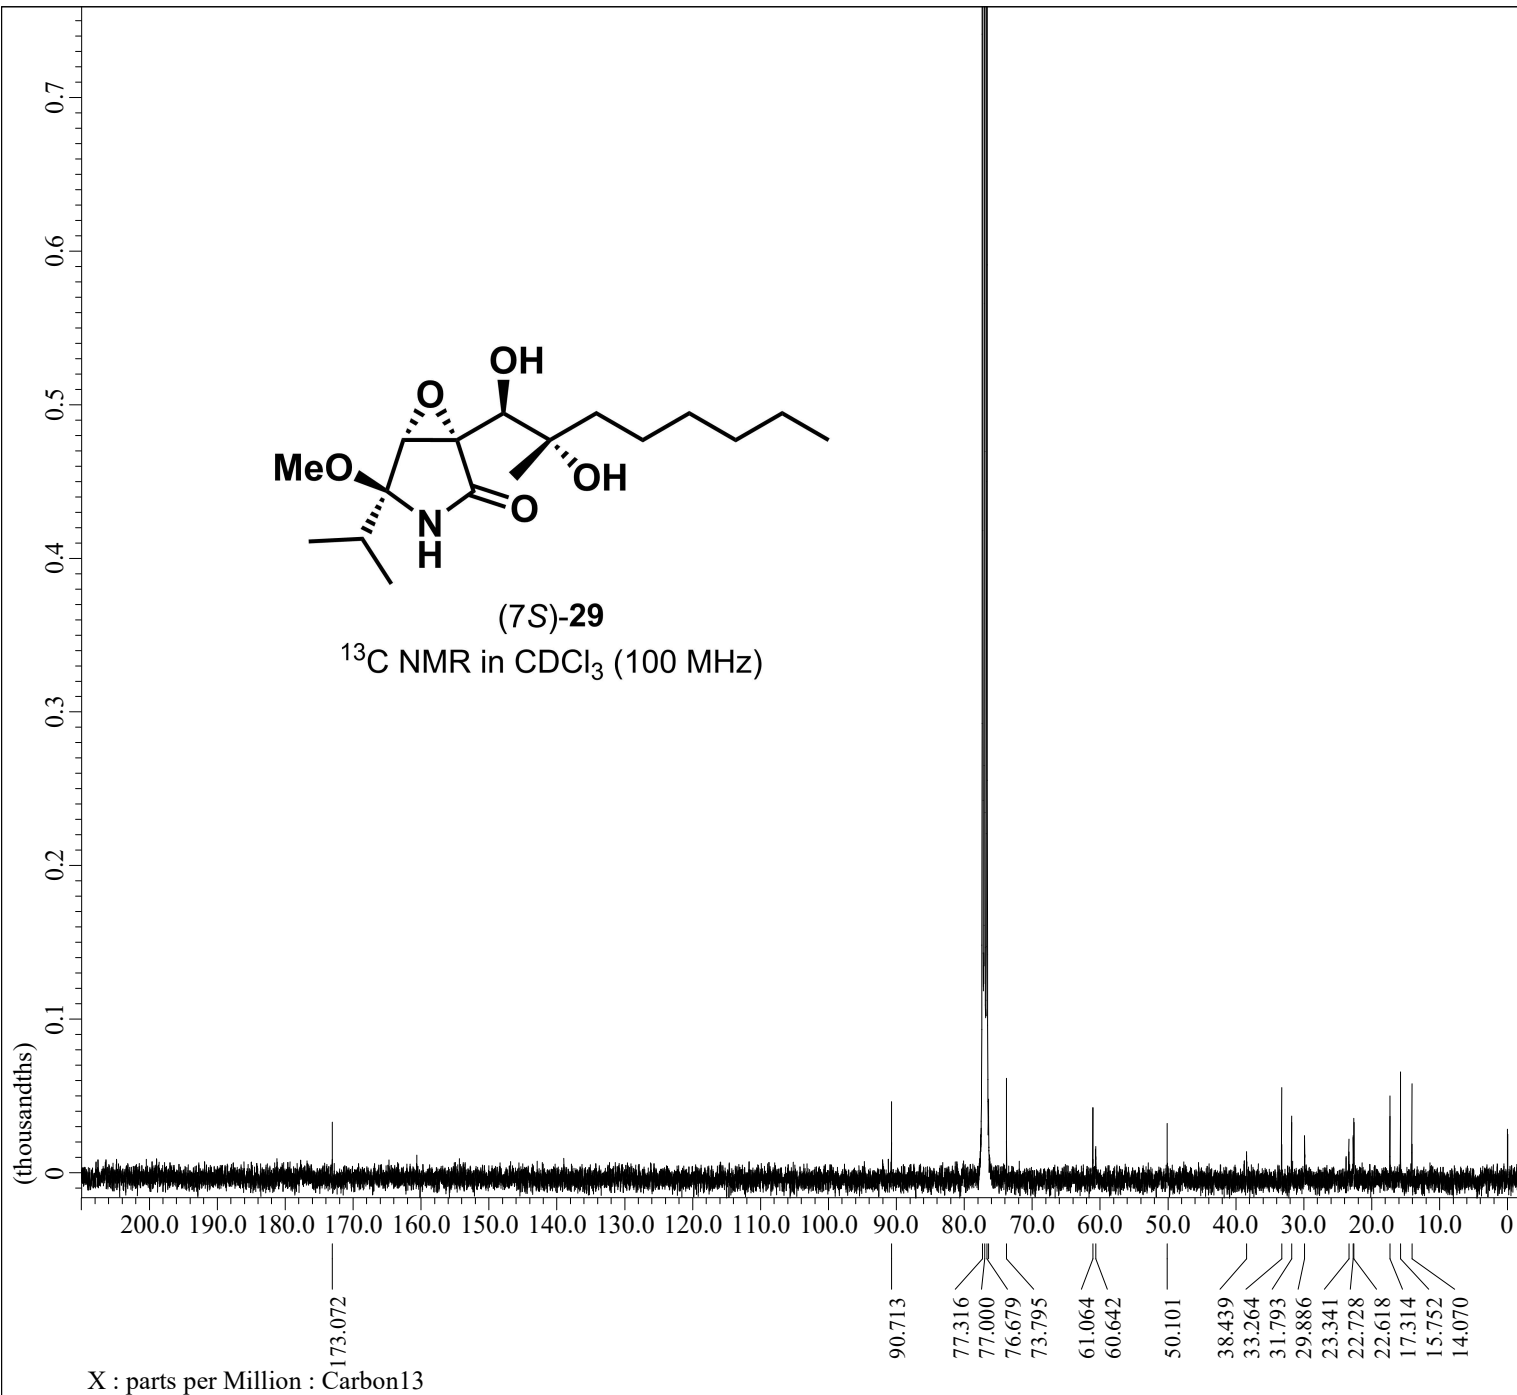

Filename = MMK17-15-s\_Carbon-  
Author = delta  
Experiment = carbon.jxp  
Sample\_Id = MMK17-15-s  
Solvent = CHLOROFORM-D  
Actual\_Start\_Time = 10-AUG-2024 17:37:  
Revision\_Time = 14-AUG-2024 10:46:

Data\_Format = 1D\_COMPLEX  
Dim\_Size = 52429  
X\_Domain = Carbon13  
Dim\_Title = Carbon13  
Dim\_Units = [ppm]  
Dimensions = X  
Site = ECZL400  
Spectrometer = NM-70010S4L1

Field\_Strength = 9.389766[T] (400[M]  
X\_Acq\_Duration = 0.9952272[s]  
X\_Domain = Carbon13  
X\_Freq = 100.52530333[MHz]  
X\_Offset = 100[ppm]  
X\_Points = 31415  
X\_Prescans = 4  
X\_Resolution = 1.00479569[Hz]  
X\_Sweep = 31.56565657[kHz]  
X\_Sweep\_Clippped = 25.25252525[kHz]  
Irr\_Domain = Proton  
Irr\_Freq = 399.78219838[MHz]  
Irr\_Offset = 5[ppm]  
Tri\_Domain = Carbon13  
Tri\_Freq = 100.52530333[MHz]  
Tri\_Offset = 5[ppm]  
Blanking = 2.0[us]  
Clipped = TRUE  
Scans = 29146  
Total\_Scans = 29146

Relaxation\_Delay = 2[s]  
Recvr\_Gain = 50  
Temp\_Get = 21.7[dC]  
X\_90\_Width = 11.03[us]  
X\_Acq\_Time = 0.9952272[s]  
X\_Angle = 30[deg]  
X\_Atn = 9[dB]  
X\_Data\_Points = 32768  
X\_Points\_Default = 22547  
X\_Points\_Input = 25132  
X\_Pulse = 3.67666667[us]  
X\_Sweep\_Input = 251.0[ppm]  
Irr\_Atn\_Dec = 28.666[dB]  
Irr\_Atn\_Dec\_Calc = 28.666[dB]  
Irr\_Atn\_Noie = 28.666[dB]  
Irr\_Bandwidth = 4.7826087[kHz]  
Irr\_Bandwidth\_Ppm = 11.96303566[ppm]  
Irr\_Corresp\_Pw90 = 0.115[ms]  
Irr\_Dec\_Freq = 399.78219838[MHz]  
Irr\_Decoupling = TRUE  
Irr\_Noie = TRUE  
Irr\_Noie = WALTZ  
Irr\_Offset\_Default = 5[ppm]

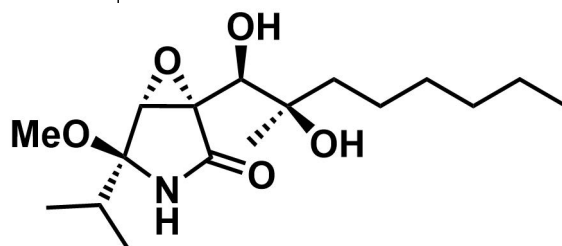

(7R)-30

<sup>1</sup>H NMR in CDCl<sub>3</sub> (400 MHz)

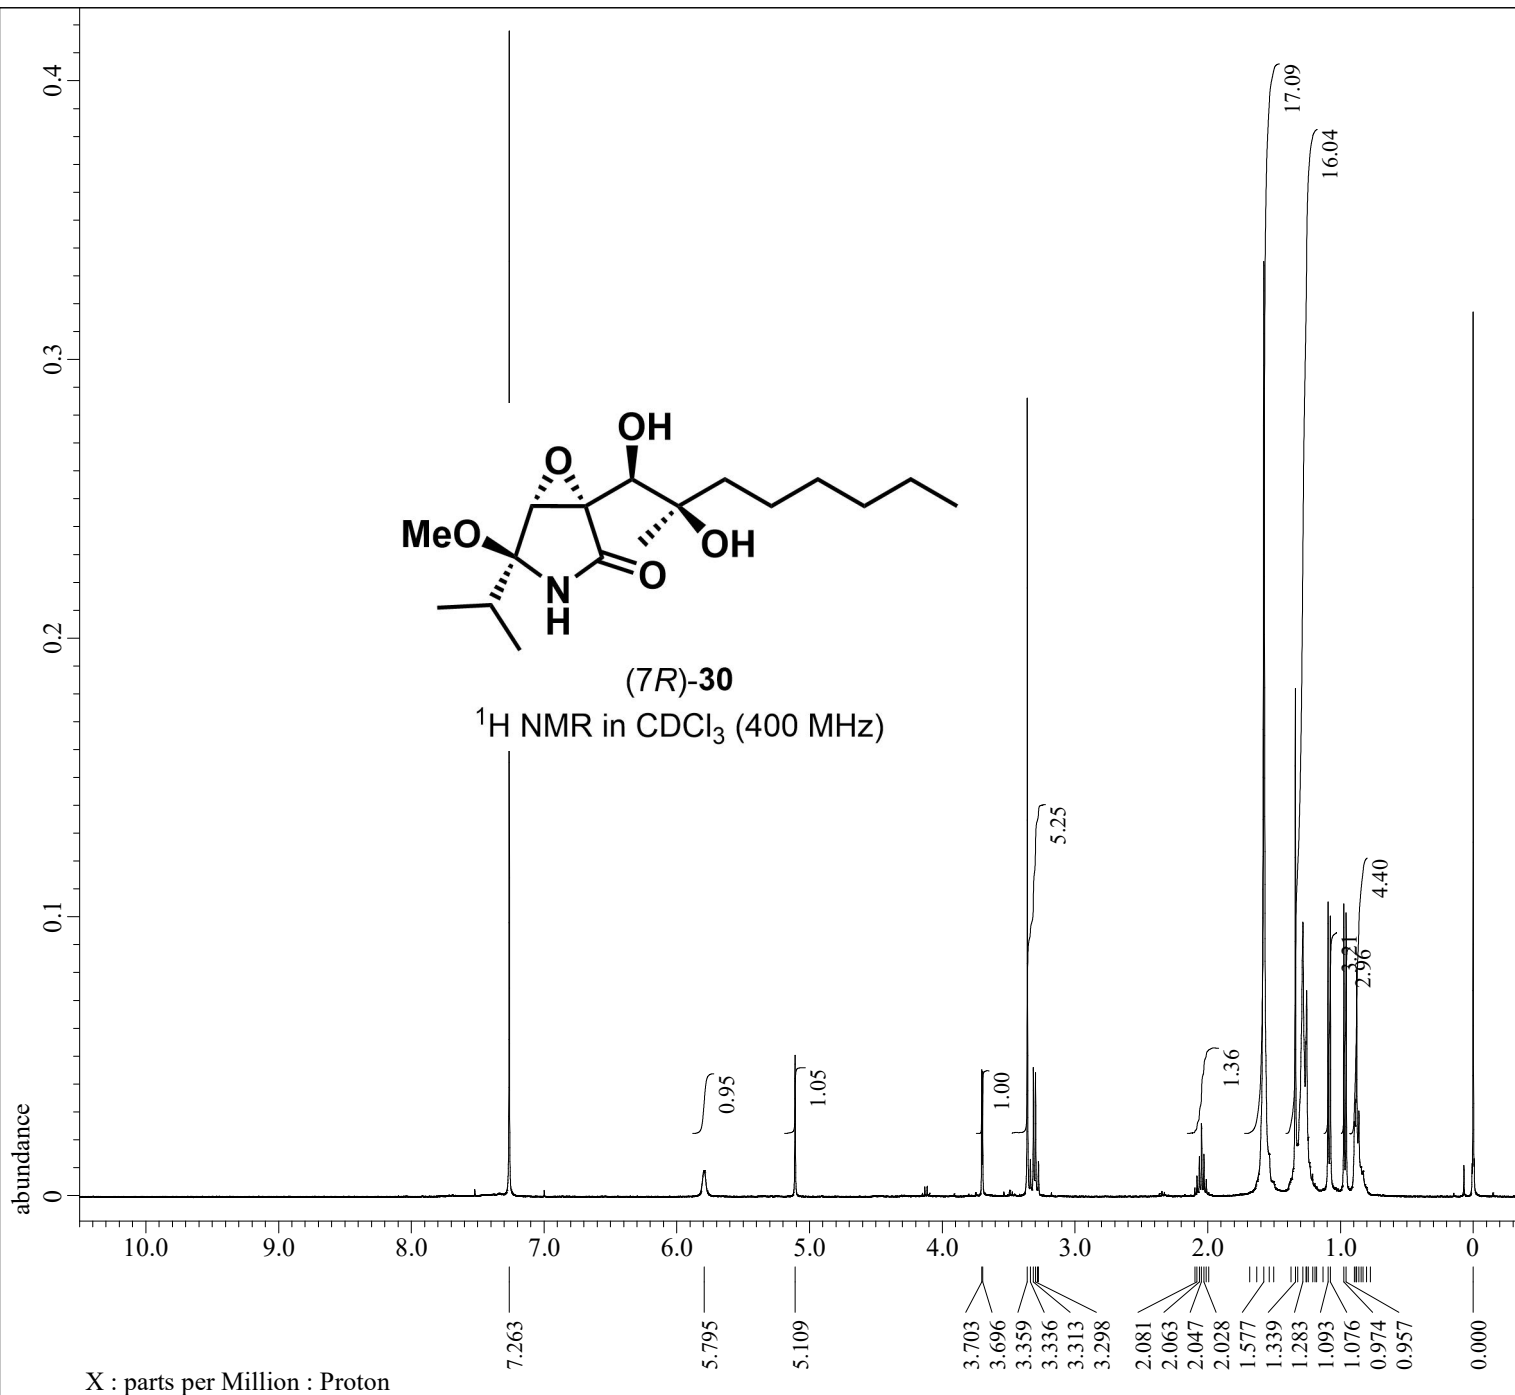

Filename = MMK17-15-R\_Proton-  
 Author = delta  
 Experiment = proton.jxp  
 Sample\_Id = MMK17-15-R  
 Solvent = CHLOROFORM-D  
 Actual\_Start\_Time = 9-AUG-2024 21:21:  
 Revision\_Time = 14-AUG-2024 10:24:

Data\_Format = 1D COMPLEX  
 Dim\_Size = 26214  
 X\_Domain = Proton  
 Dim\_Title = Proton  
 Dim\_Units = [ppm]  
 Dimensions = X  
 Site = ECZL400  
 Spectrometer = NM-70010S4L1

Field\_Strength = 9.389766[T] (400[M]  
 X\_Acq\_Duration = 2.0470176[s]  
 X\_Domain = Proton  
 X\_Freq = 399.78219838[MHz]  
 X\_Offset = 5[ppm]  
 X\_Points = 15368  
 X\_Prescans = 1  
 X\_Resolution = 0.48851558[Hz]  
 X\_Sweep = 7.50750751[kHz]  
 X\_Sweep\_Clipped = 6.00600601[kHz]  
 Irr\_Domain = Proton  
 Irr\_Freq = 399.78219838[MHz]  
 Irr\_Offset = 5[ppm]  
 Tri\_Domain = Proton  
 Tri\_Freq = 399.78219838[MHz]  
 Tri\_Offset = 5[ppm]  
 Blanking = 2.0[us]  
 Clipped = FALSE  
 Scans = 80  
 Total\_Scans = 80

Relaxation\_Delay = 5[s]  
 Recvr\_Gain = 66  
 Temp\_Get = 21.7[dC]  
 X\_90\_Width = 6.65[us]  
 X\_Acq\_Time = 2.0470176[s]  
 X\_Angle = 45[deg]  
 X\_Atn = 4[dB]  
 X\_Data\_Points = 65536  
 X\_Points\_Default = 23933  
 X\_Points\_Input = 12294  
 X\_Pulse = 3.325[us]  
 X\_Sweep\_Input = 15[ppm]  
 Irr\_Mode = Off  
 Tri\_Mode = Off  
 Dante\_Loop = 500  
 Dante\_Presat = FALSE  
 Decimation\_Rate = 0  
 Default\_X\_Resolution = 0.3137[Hz]  
 Experiment\_Path = C:\Program Files\J  
 Initial\_Wait = 1[s]  
 Phase = {0, 90, 270, 180,  
 Presat\_Time = 5[s]  
 Presat\_Time\_Flag = FALSE

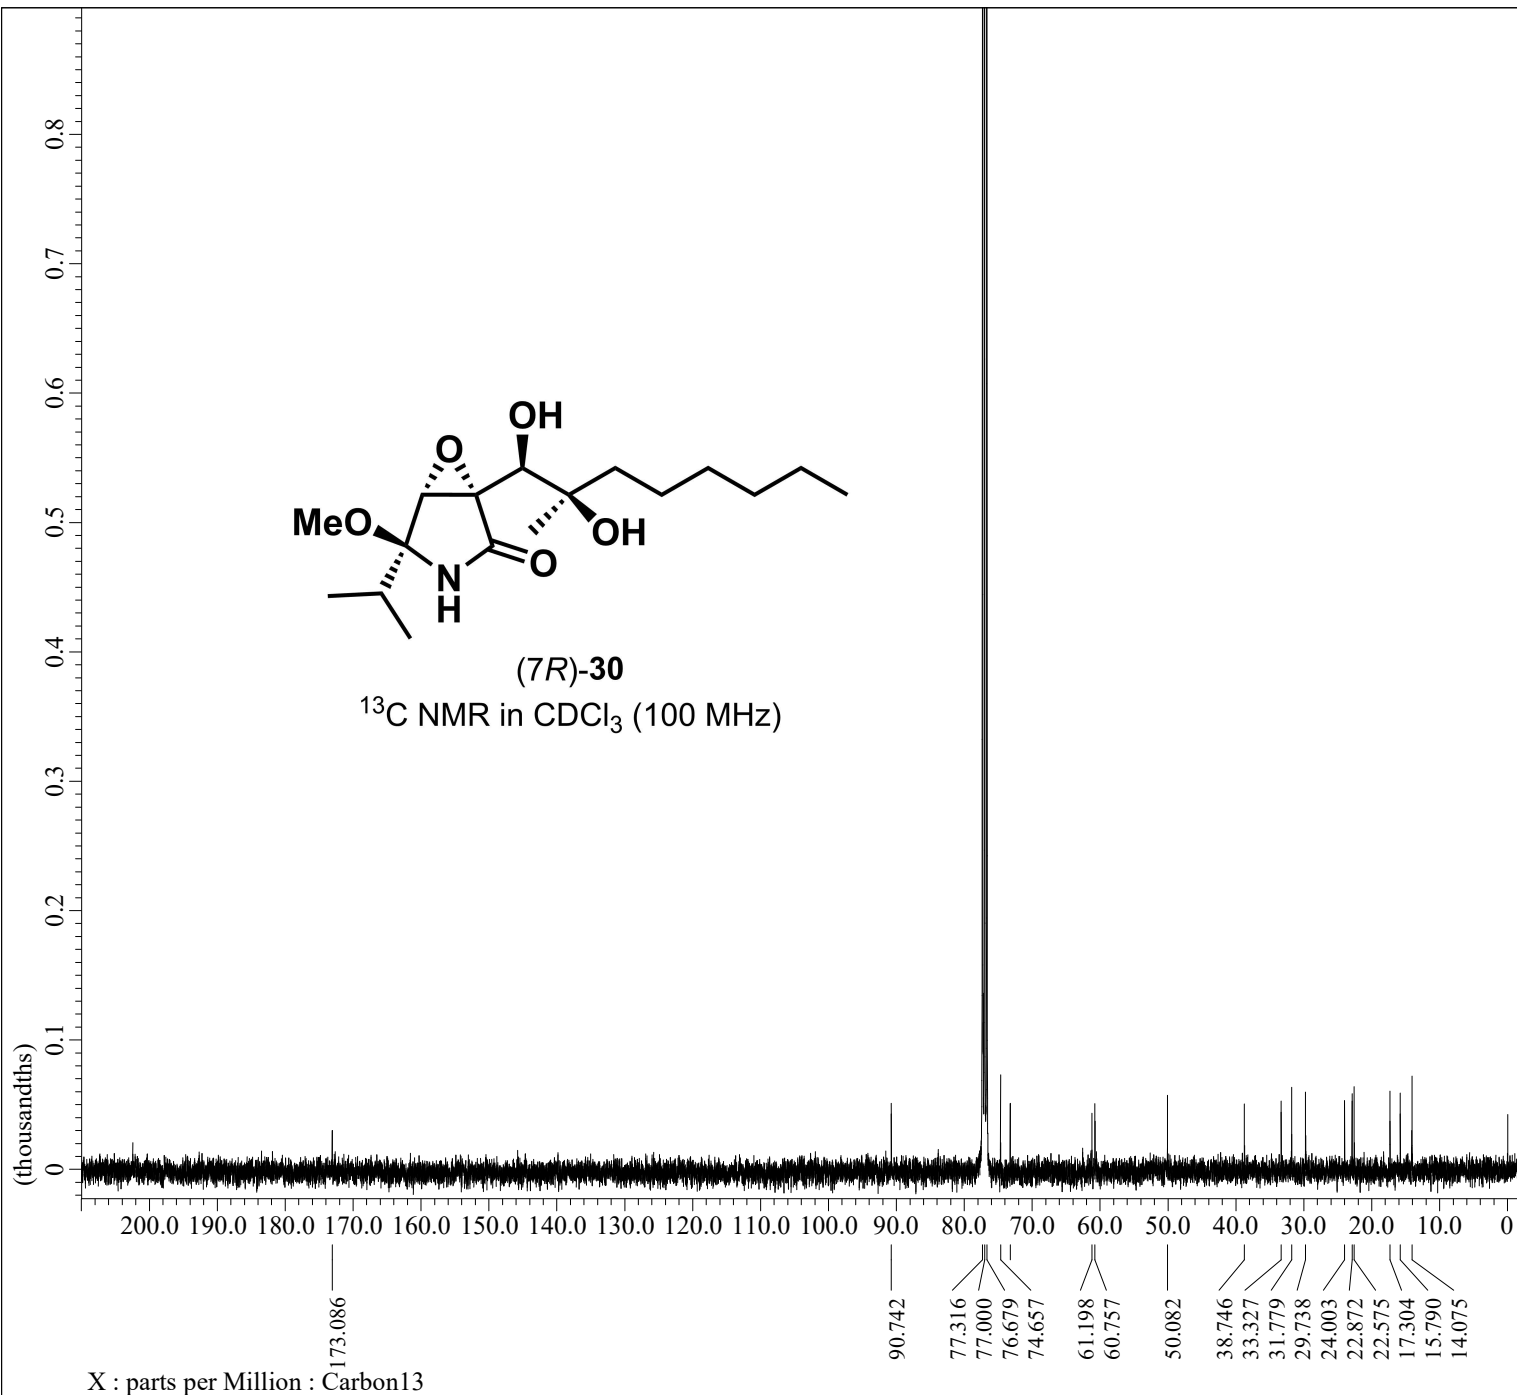

Filename = MMK17-15-R\_Carbon-  
Author = delta  
Experiment = carbon.jxp  
Sample\_Id = MMK17-15-R  
Solvent = CHLOROFORM-D  
Actual\_Start\_Time = 9-AUG-2024 21:34:  
Revision\_Time = 14-AUG-2024 10:38:

Data\_Format = 1D\_COMPLEX  
Dim\_Size = 52429  
X\_Domain = Carbon13  
Dim\_Title = Carbon13  
Dim\_Units = [ppm]  
Dimensions = X  
Site = ECZL400  
Spectrometer = NM-70010S4L1

Field\_Strength = 9.389766[T] (400[M]  
X\_Acq\_Duration = 0.9952272[s]  
X\_Domain = Carbon13  
X\_Freq = 100.52530333[MHz]  
X\_Offset = 100[ppm]  
X\_Points = 31415  
X\_Prescans = 4  
X\_Resolution = 1.00479569[Hz]  
X\_Sweep = 31.56565657[kHz]  
X\_Sweep\_Clipped = 25.25252525[kHz]  
Irr\_Domain = Proton  
Irr\_Freq = 399.78219838[MHz]  
Irr\_Offset = 5[ppm]  
Tri\_Domain = Carbon13  
Tri\_Freq = 100.52530333[MHz]  
Tri\_Offset = 5[ppm]  
Blanking = 2.0[us]  
Clipped = TRUE  
Scans = 24000  
Total\_Scans = 24000

Relaxation\_Delay = 2[s]  
Recvr\_Gain = 50  
Temp\_Get = 21.5[dC]  
X\_90\_Width = 11.03[us]  
X\_Acq\_Time = 0.9952272[s]  
X\_Angle = 30[deg]  
X\_Atn = 9[dB]  
X\_Data\_Points = 32768  
X\_Points\_Default = 22547  
X\_Points\_Input = 25132  
X\_Pulse = 3.67666667[us]  
X\_Sweep\_Input = 251.0[ppm]  
Irr\_Atn\_Dec = 28.666[dB]  
Irr\_Atn\_Dec\_Calc = 28.666[dB]  
Irr\_Atn\_Noise = 28.666[dB]  
Irr\_Bandwidth = 4.7826087[kHz]  
Irr\_Bandwidth\_Ppm = 11.96303566[ppm]  
Irr\_Corresp\_Pw90 = 0.115[ms]  
Irr\_Dec\_Freq = 399.78219838[MHz]  
Irr\_Decoupling = TRUE  
Irr\_Noise = TRUE  
Irr\_Noise = WALTZ  
Irr\_Offset\_Default = 5[ppm]

C:\Documents and Settings\Thermo\Desktop\kobayashi\S3-1H.a1s

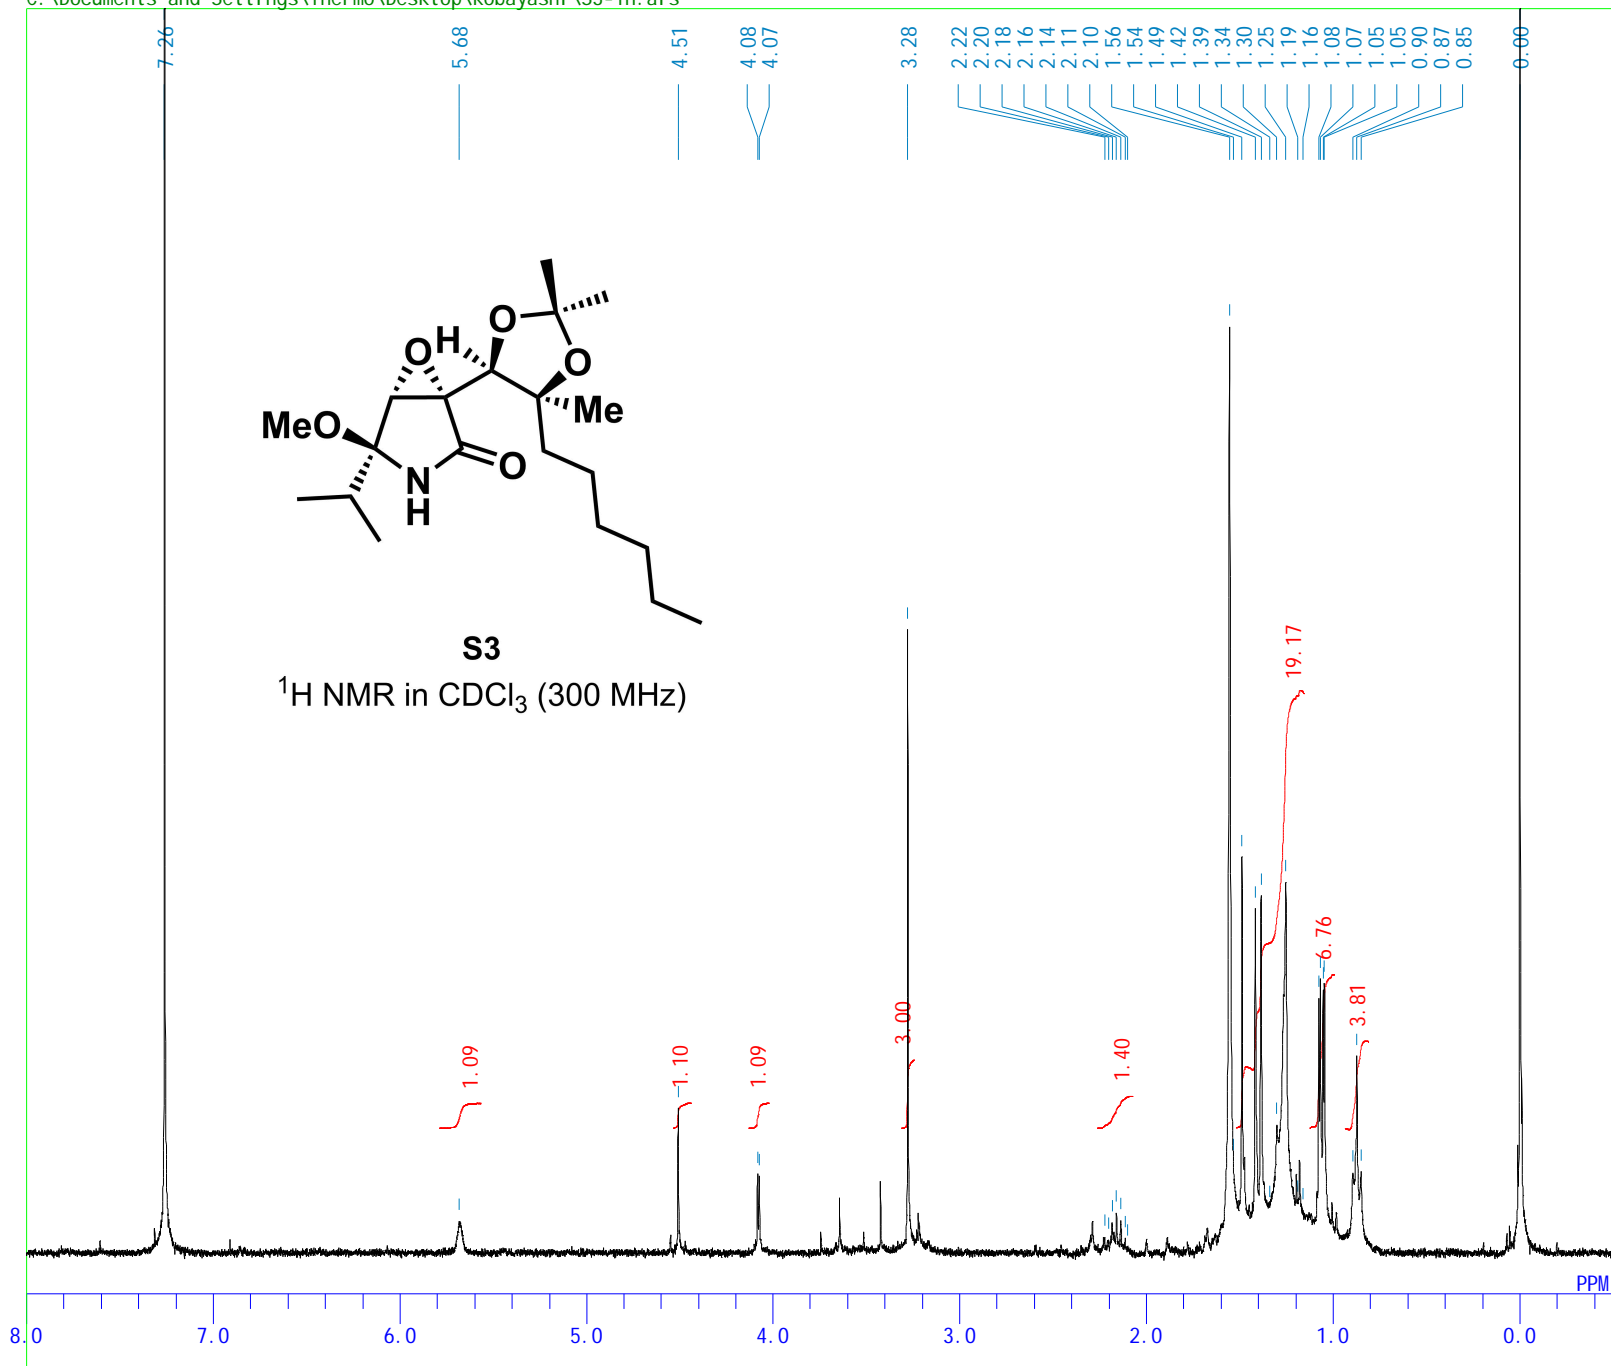

DFILE S3-1H.a1s  
 COMNT S3-1H  
 DATIM Mon Nov 19 13:15:48 2018  
 OBNUC 1H  
 EXMOD NON  
 OBFRO 300.40 MHz  
 OBSET 130.00 KHz  
 OBFIN 1150.00 Hz  
 POINT 32768  
 FREQU 6006.01 Hz  
 SCANS 16  
 ACQTM 5.4559 sec  
 PD 1.5440 sec  
 PW1 5.20 usec  
 IRNUC 1H  
 CTEMP 23.8 c  
 SLVNT CDCL3  
 EXREF 0.00 ppm  
 BF 0.12 Hz  
 RGAIN 22

C:\Documents and Settings\Thermo\Desktop\kobayashi\S4-1H.a1s

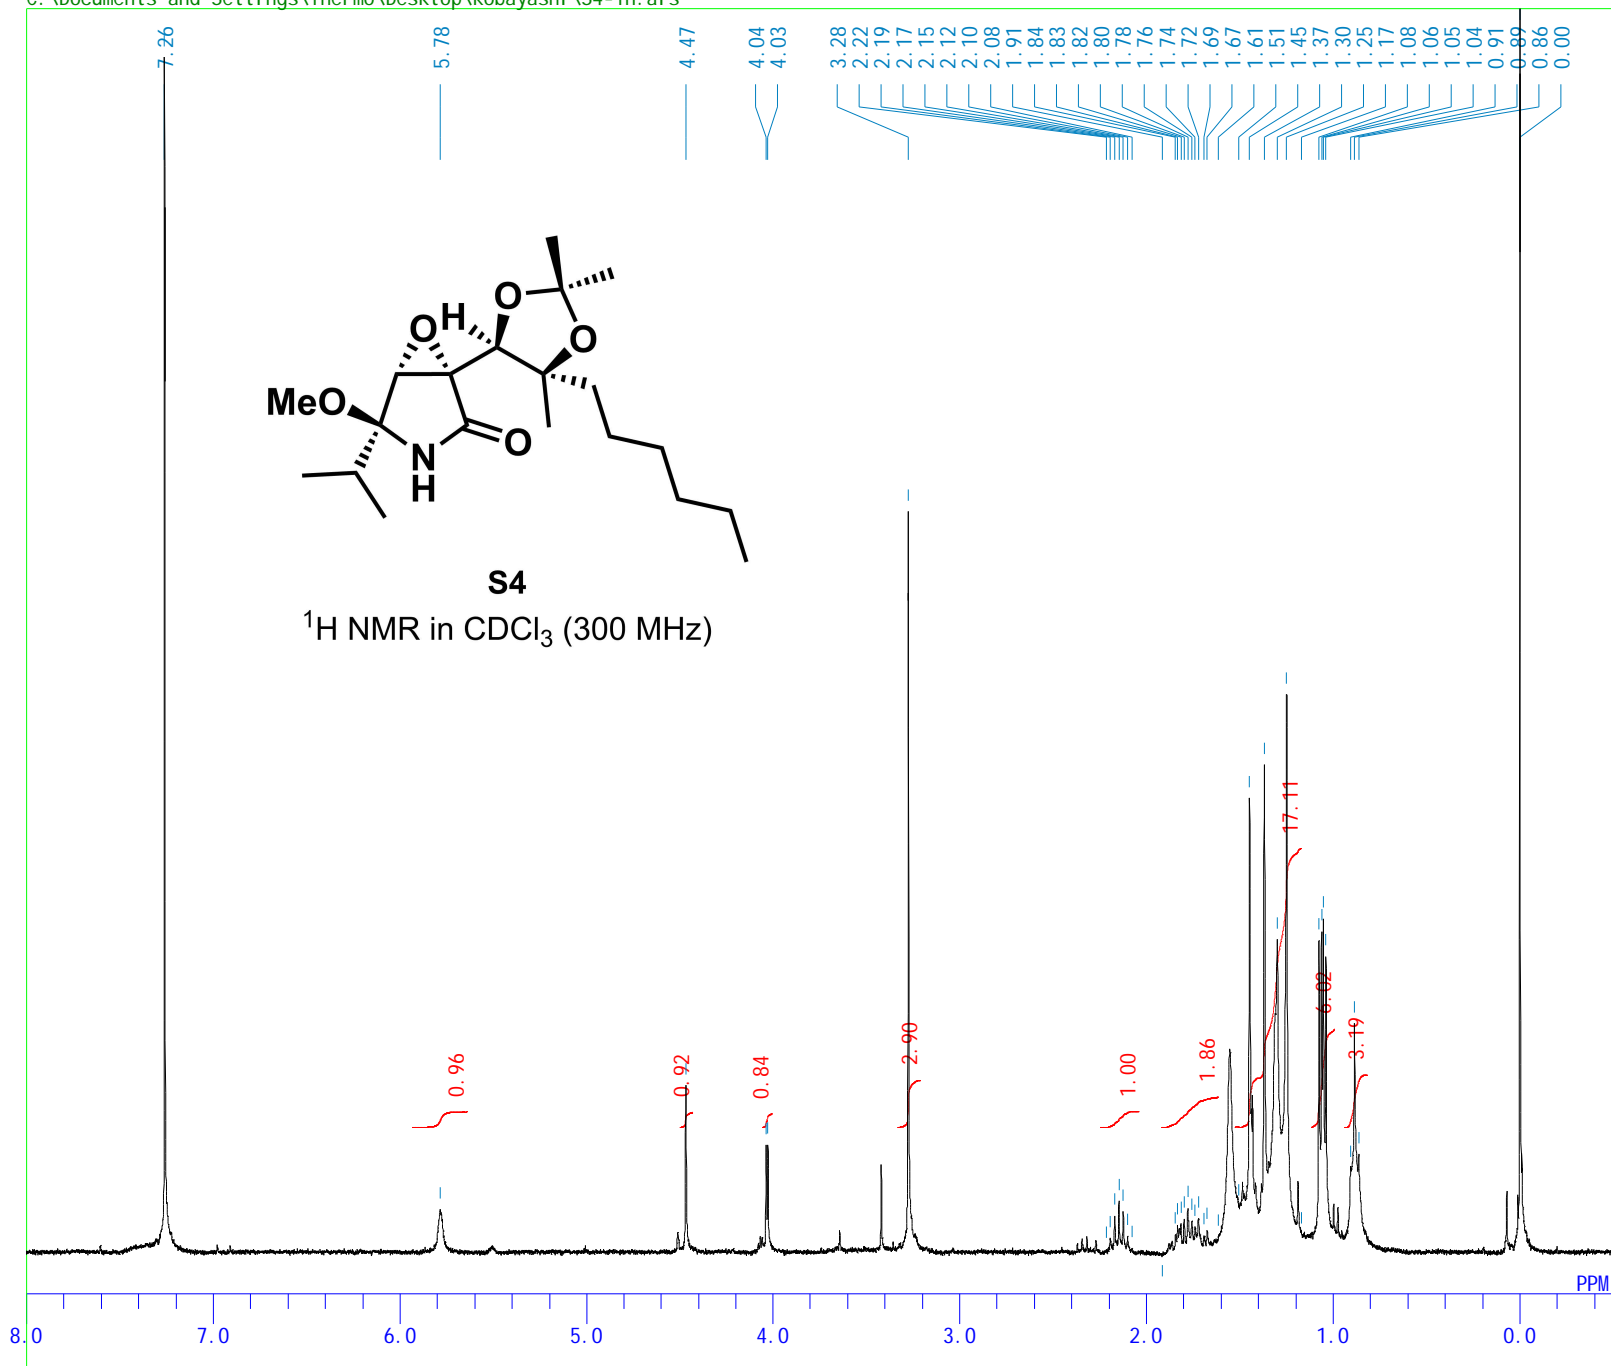

DFILE S4-1H.a1s  
 COMNT S4-1H  
 DATIM Fri Nov 16 19:28:38 2018  
 OBNUC 1H  
 EXMOD NON  
 OBFRO 300.40 MHz  
 OBSET 130.00 KHz  
 OBFIN 1150.00 Hz  
 POINT 32768  
 FREQU 6006.01 Hz  
 SCANS 16  
 ACQTM 5.4559 sec  
 PD 1.5440 sec  
 PW1 5.20 usec  
 IRNUC 1H  
 CTEMP 25.0 c  
 SLVNT CDCL3  
 EXREF 0.00 ppm  
 BF 0.12 Hz  
 RGAIN 21

F:\kobayashi\ (7S)-31-1H.als

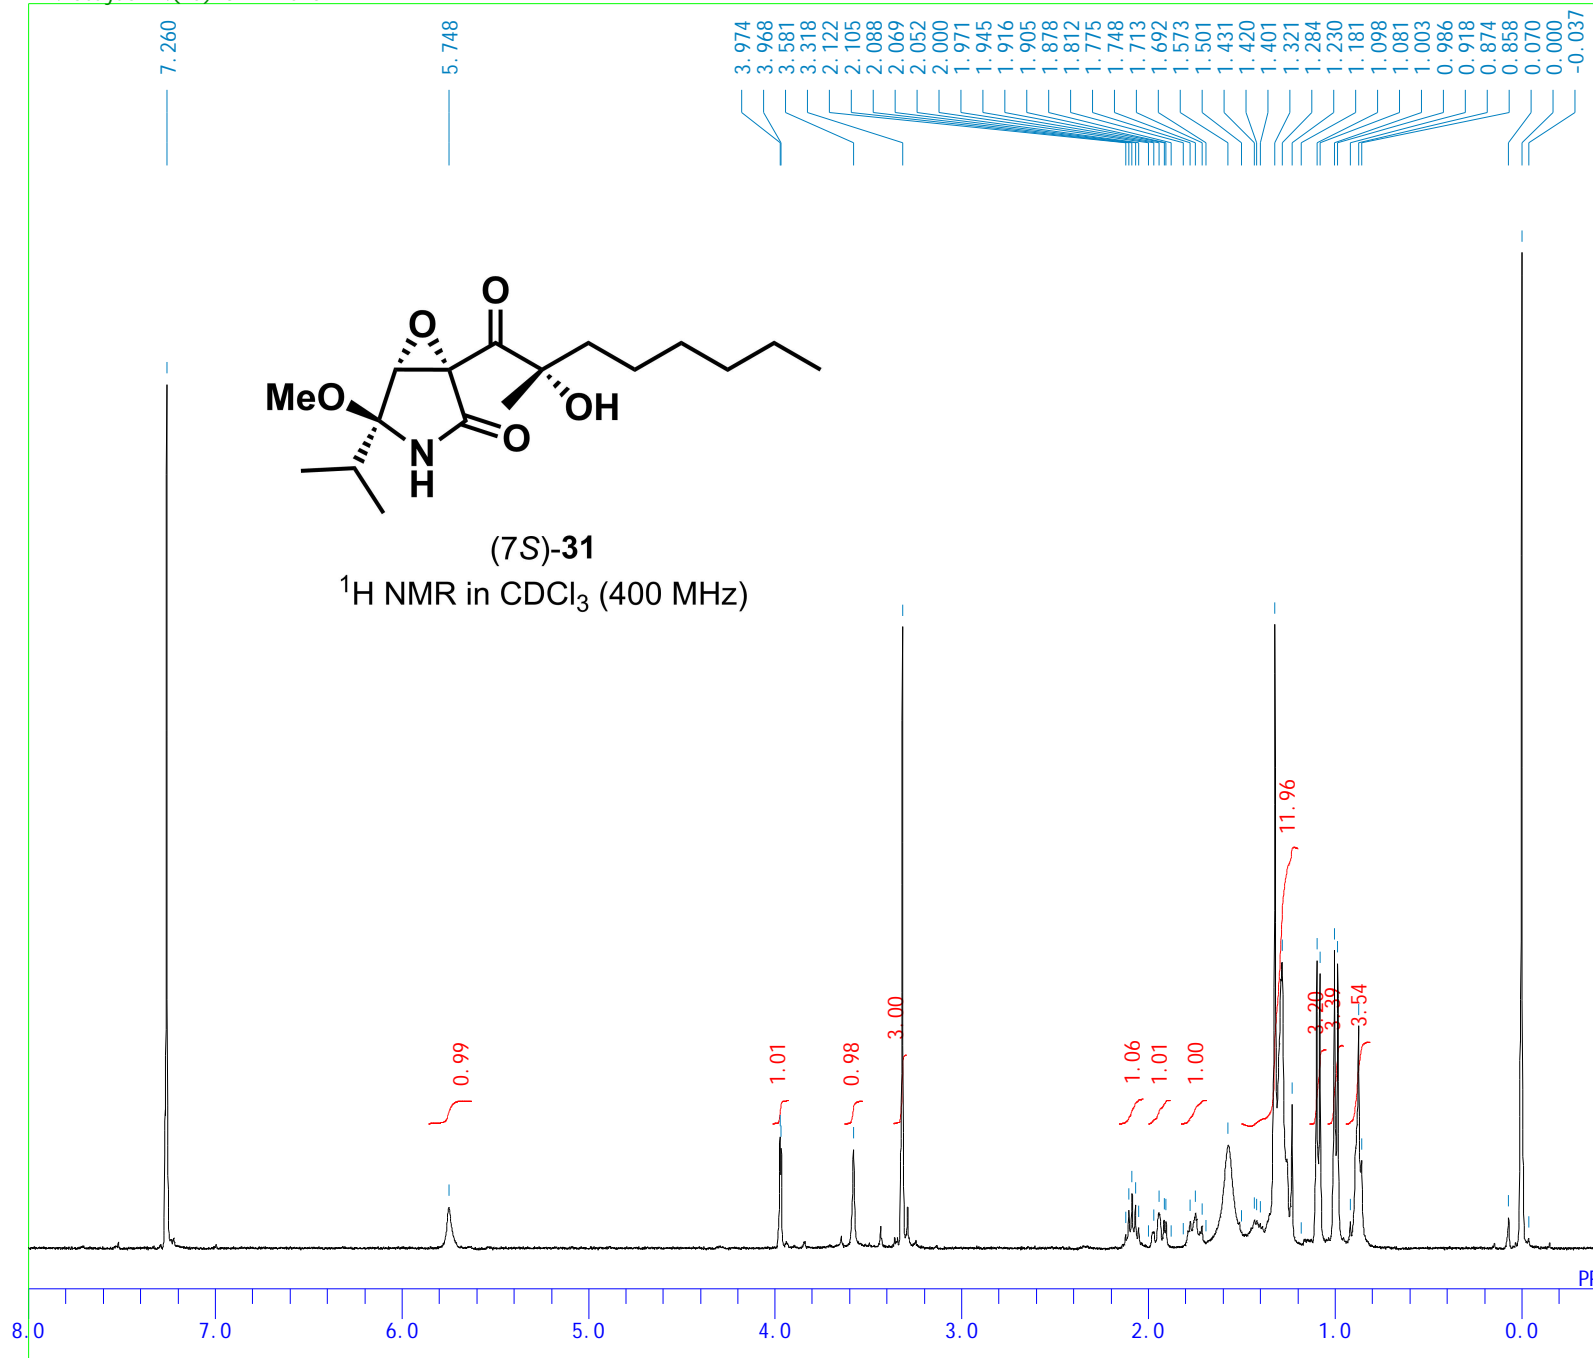

DFILE (7S)-31-1H.als  
COMNT (7S)-31-1H  
DATIM Mon May 14 11:05:30 2018  
OBNUC 1H  
EXMOD NON  
OBFRQ 399.65 MHz  
OBSET 124.00 KHz  
OBFIN 10500.00 Hz  
POINT 16384  
FREQU 7992.01 Hz  
SCANS 31  
ACQTM 2.0500 sec  
PD 4.9500 sec  
PW1 5.80 usec  
IRNUC 1H  
CTEMP 24.8 c  
SLVNT CDCL3  
EXREF 0.00 ppm  
BF 0.12 Hz  
RGAIN 23

F:\kobayashi\ (7S)-31-13C.als

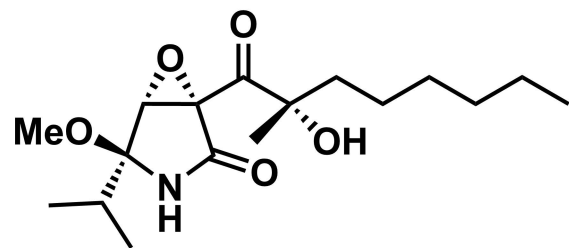

(7S)-31

<sup>13</sup>C NMR in CDCl<sub>3</sub> (100 MHz)

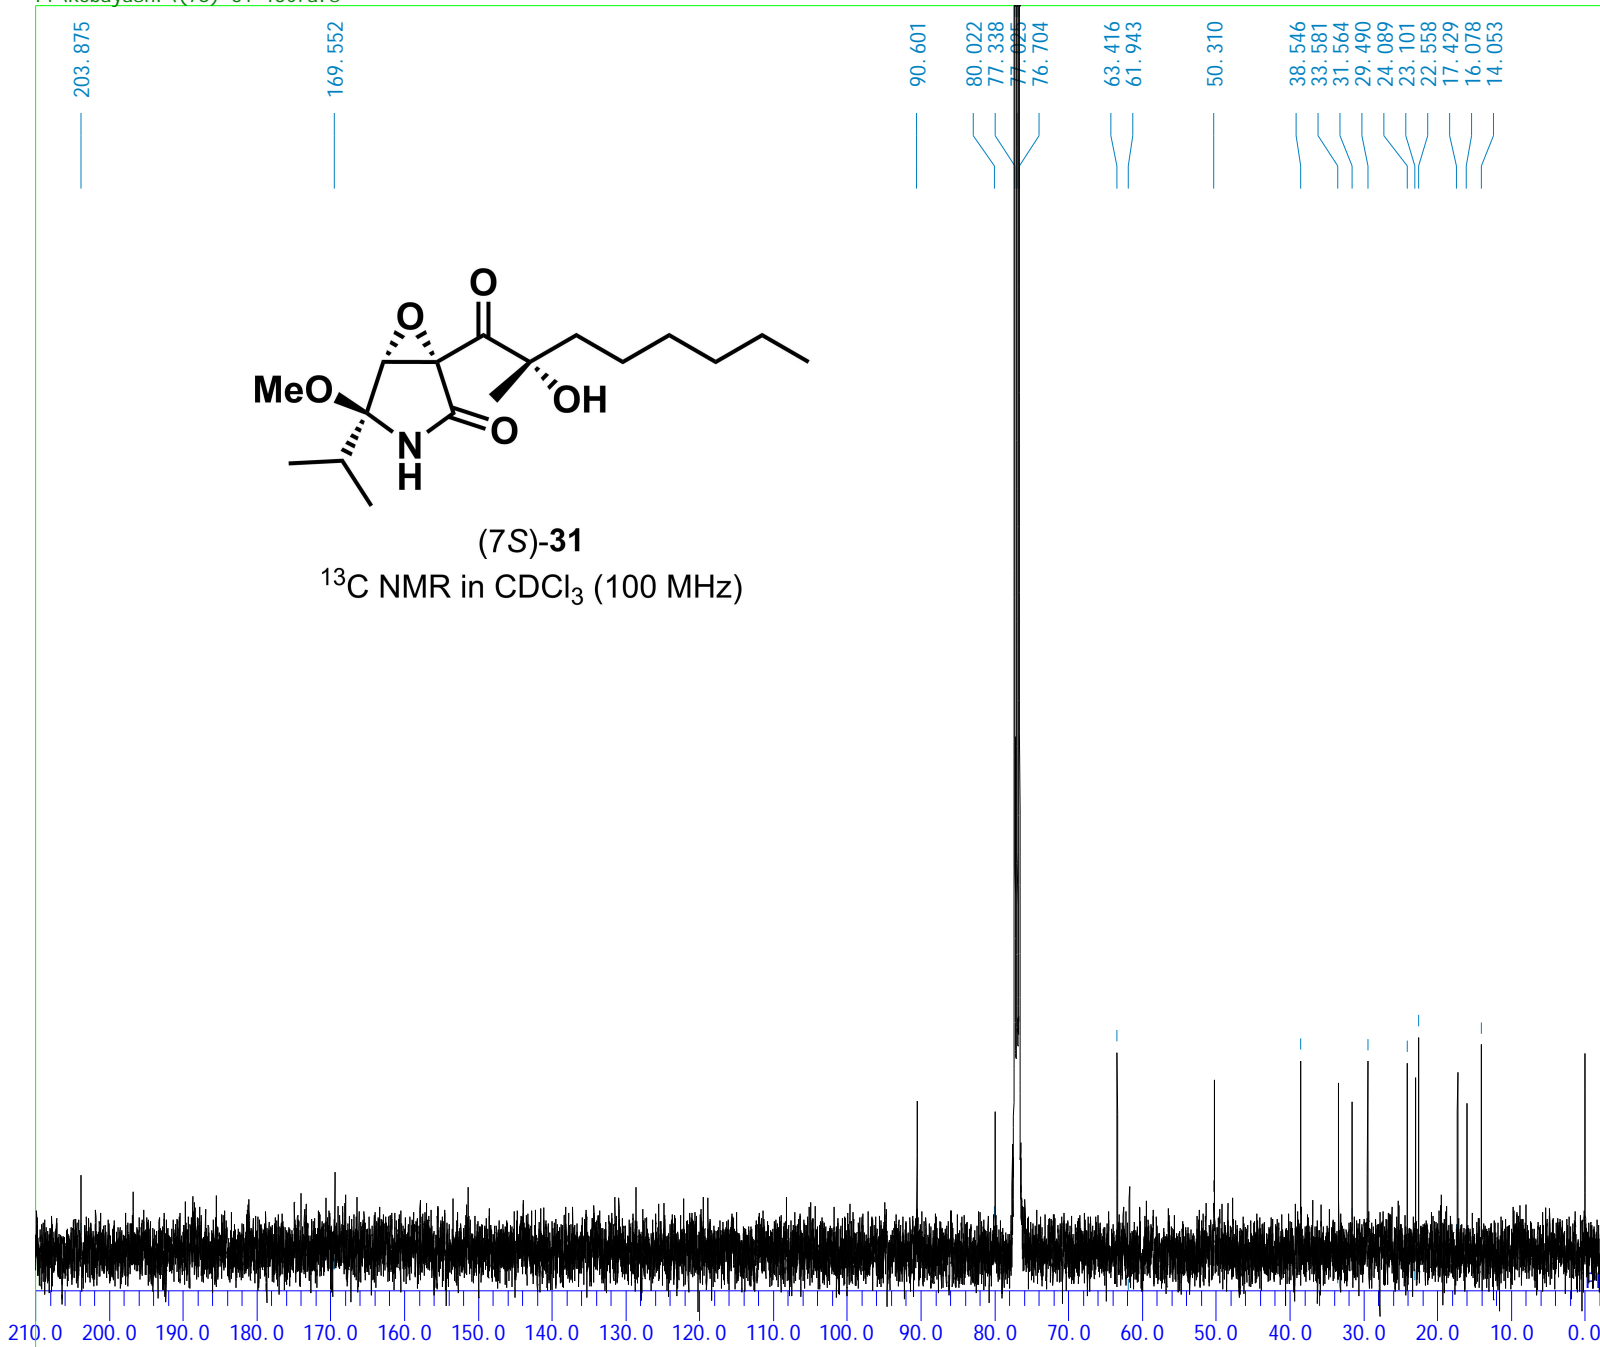

DFILE (7S)-31-13C.als  
COMNT (7S)-31-13C  
DATIM Mon May 14 14:49:26 2018  
OBNUC 13C  
EXMOD BCM  
OBFRQ 100.40 MHz  
OBSET 125.00 KHz  
OBFIN 10500.00 Hz  
POINT 32768  
FREQU 27118.64 Hz  
SCANS 4400  
ACQTM 1.2083 sec  
PD 1.7920 sec  
PW1 5.80 usec  
IRNUC 1H  
CTEMP 24.4 c  
SLVNT CDCL3  
EXREF 0.00 ppm  
BF 1.20 Hz  
RGAIN 25

C:\Documents and Settings\Thermo\Desktop\S5-1H.als

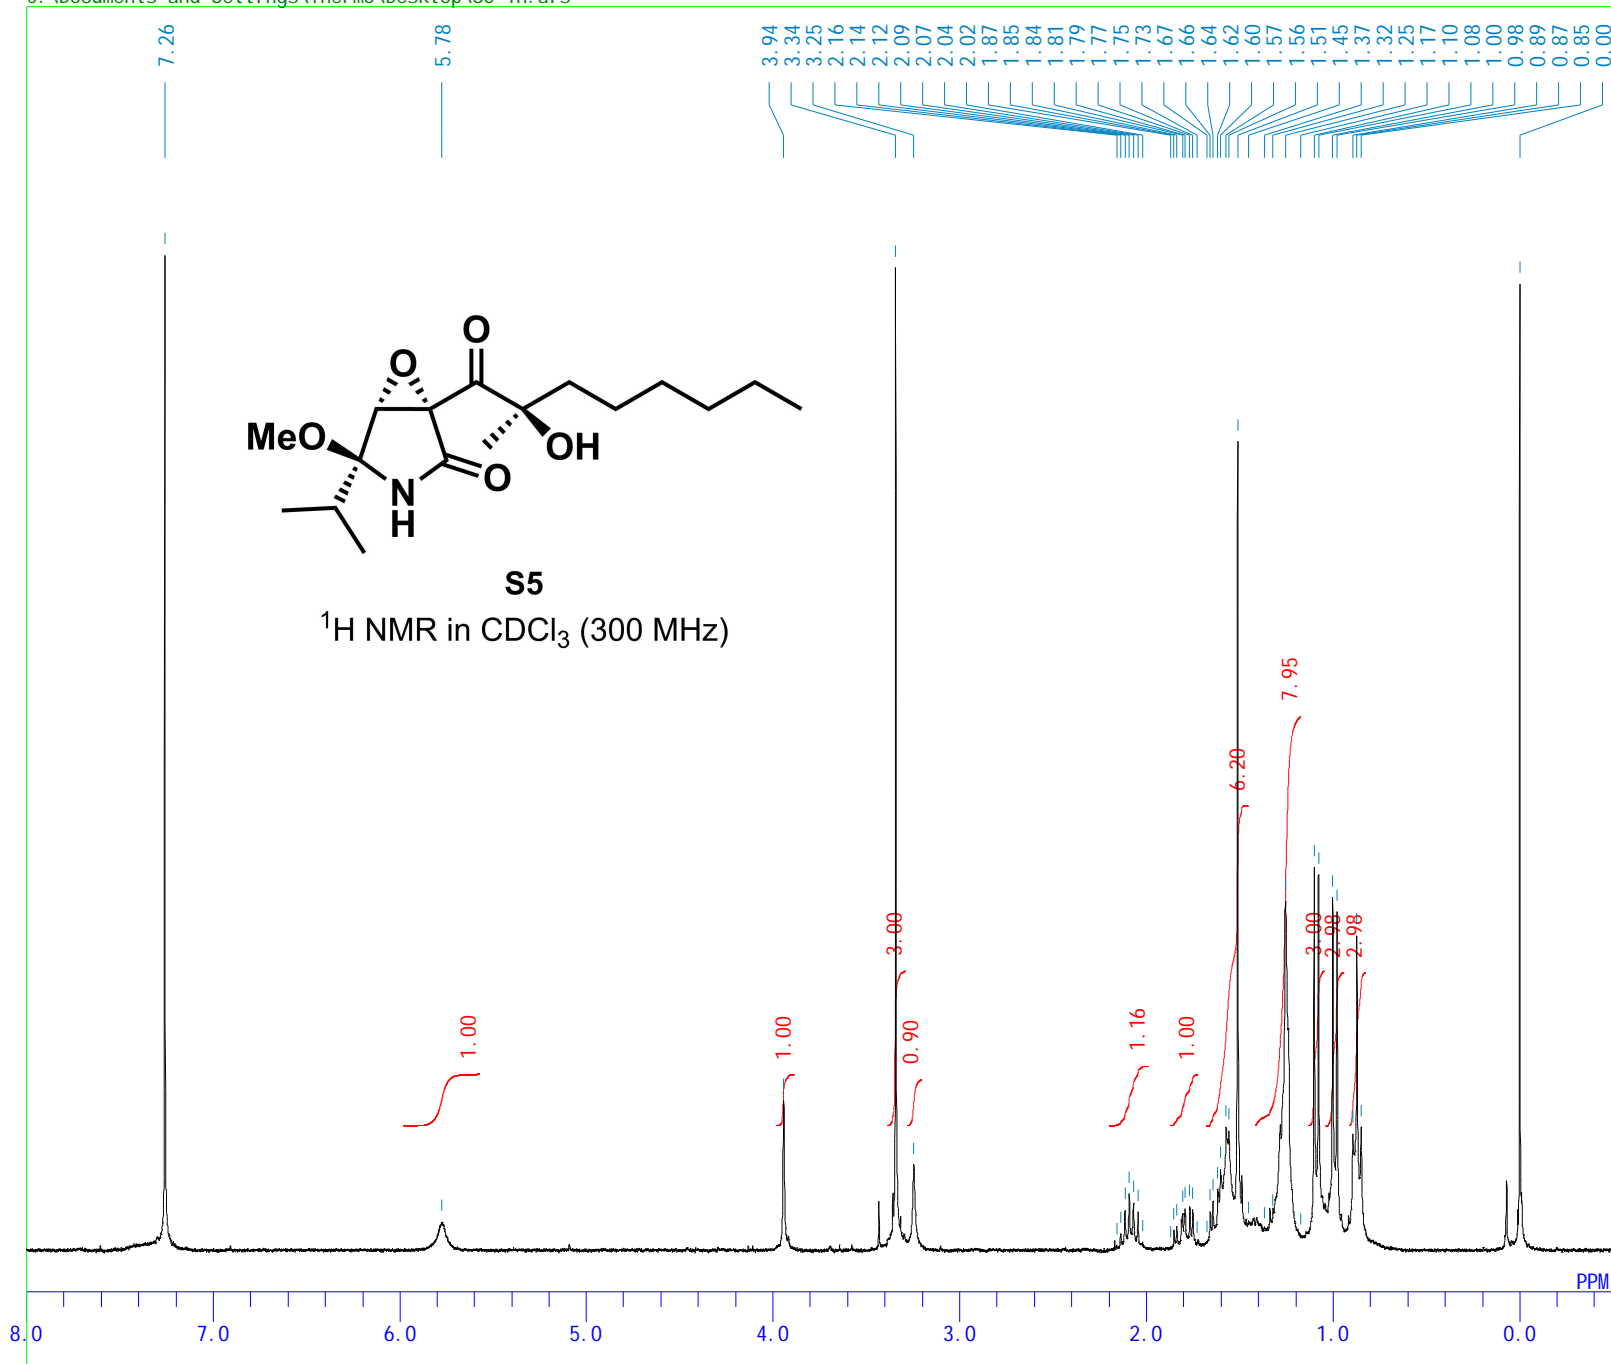

DFILE S5-1H.als  
 COMNT S5-1H  
 DATIM Tue Apr 10 10:15:30 2018  
 OBNUC 1H  
 EXMOD NON  
 OBFRO 300.40 MHz  
 OBSET 130.00 KHz  
 OBFIN 1150.00 Hz  
 POINT 32768  
 FREQU 6006.01 Hz  
 SCANS 16  
 ACQTM 5.4559 sec  
 PD 1.5440 sec  
 PW1 5.20 usec  
 IRNUC 1H  
 CTEMP 26.5 c  
 SLVNT CDCL3  
 EXREF 0.00 ppm  
 BF 0.12 Hz  
 RGA IN 20



C:\Documents and Settings\Thermo\Desktop\S5-13C.a1s

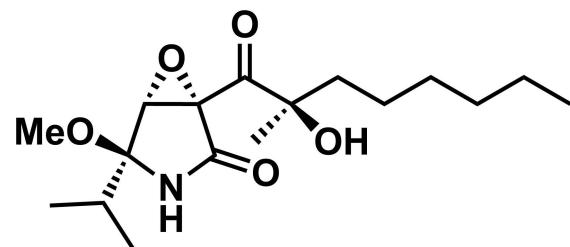

S5

 $^{13}\text{C}$  NMR in  $\text{CDCl}_3$  (100 MHz)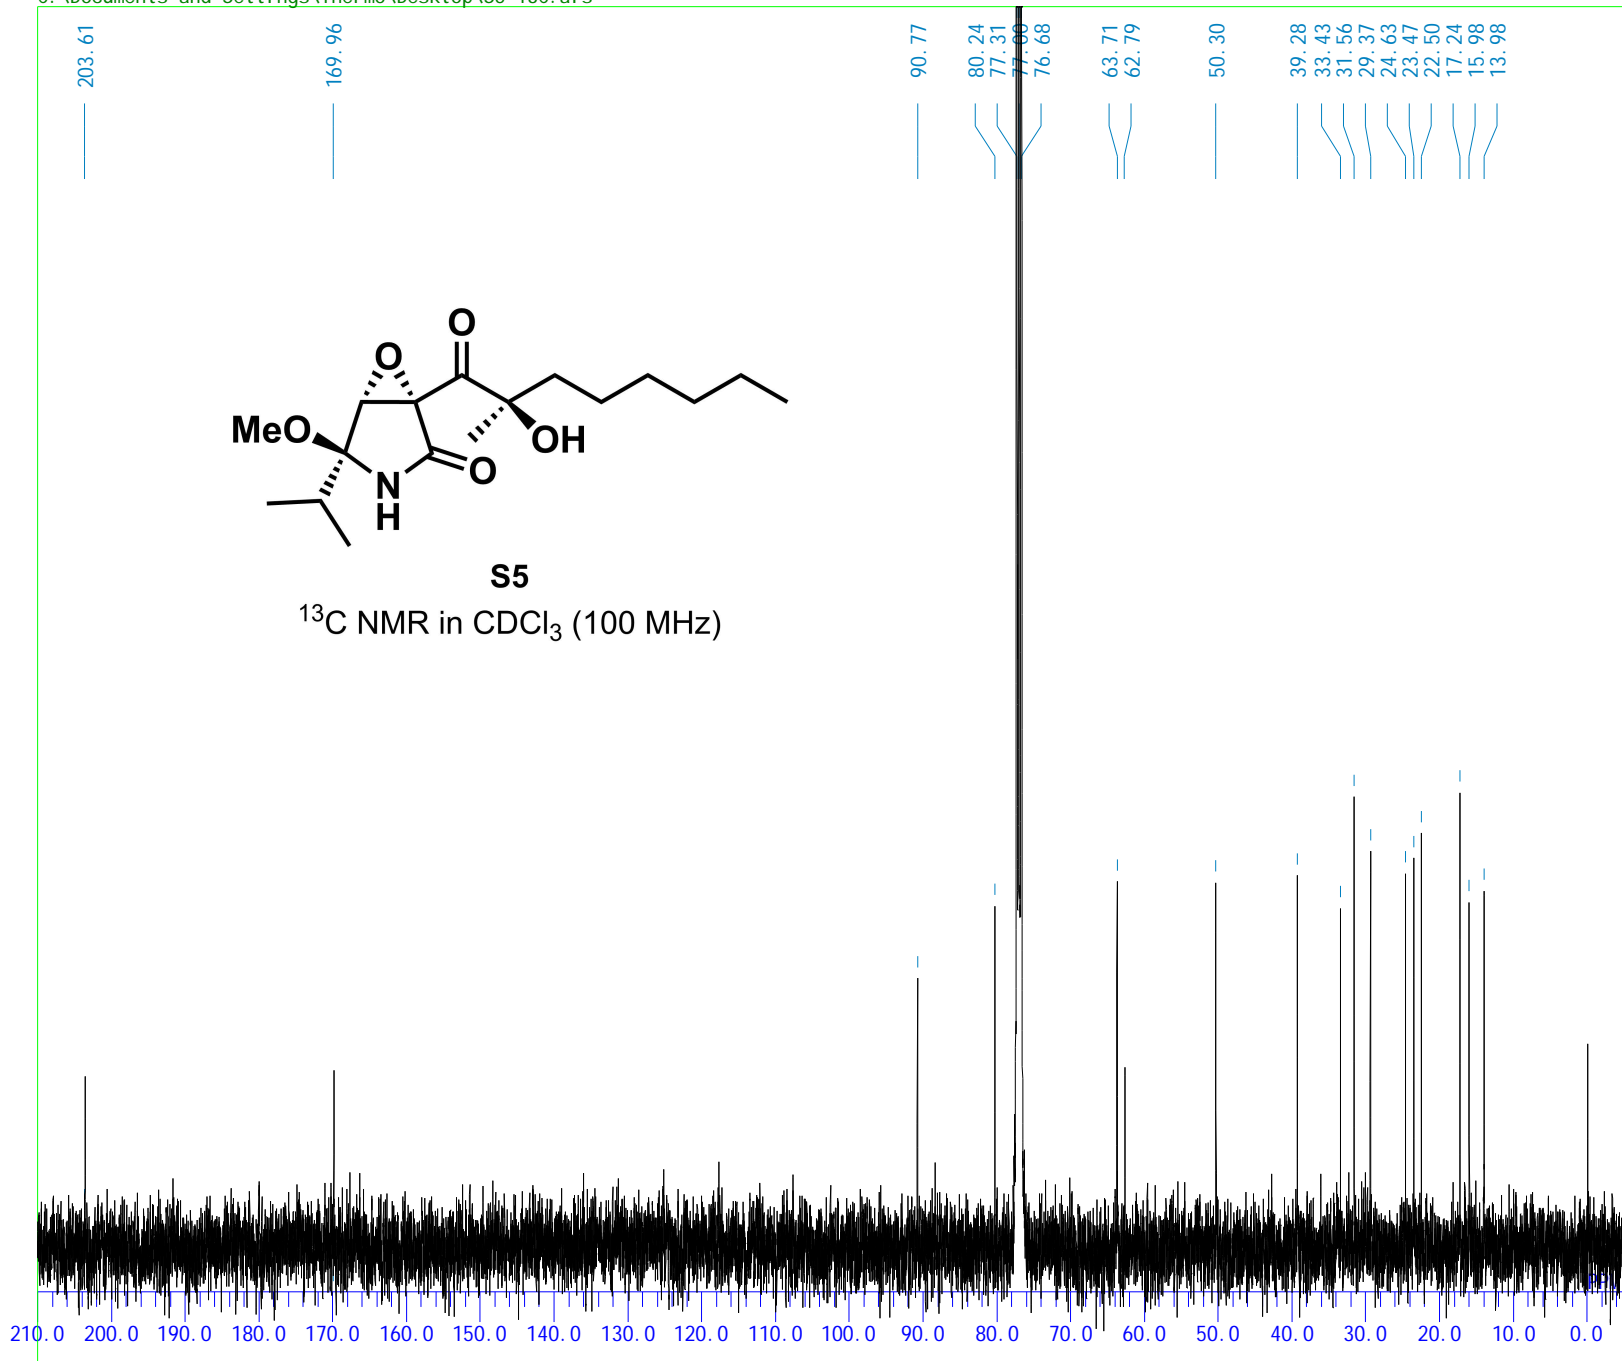

DFILE S5-13C.a1s  
COMNT S5-13C  
DATIM Tue Apr 10 13:15:01 2018  
OBNUC  $^{13}\text{C}$   
EXMOD BCM  
OBFRQ 100.40 MHz  
OBSET 125.00 KHz  
OBFIN 10500.00 Hz  
POINT 32768  
FREQU 27118.64 Hz  
SCANS 3241  
ACQTM 1.2083 sec  
PD 1.7920 sec  
PW1 5.80 usec  
IRNUC  $^1\text{H}$   
CTEMP 24.4 c  
SLVNT  $\text{CDCl}_3$   
EXREF 77.00 ppm  
BF 1.20 Hz  
RGAIN 25

F:\kobayashi\8-1H.als

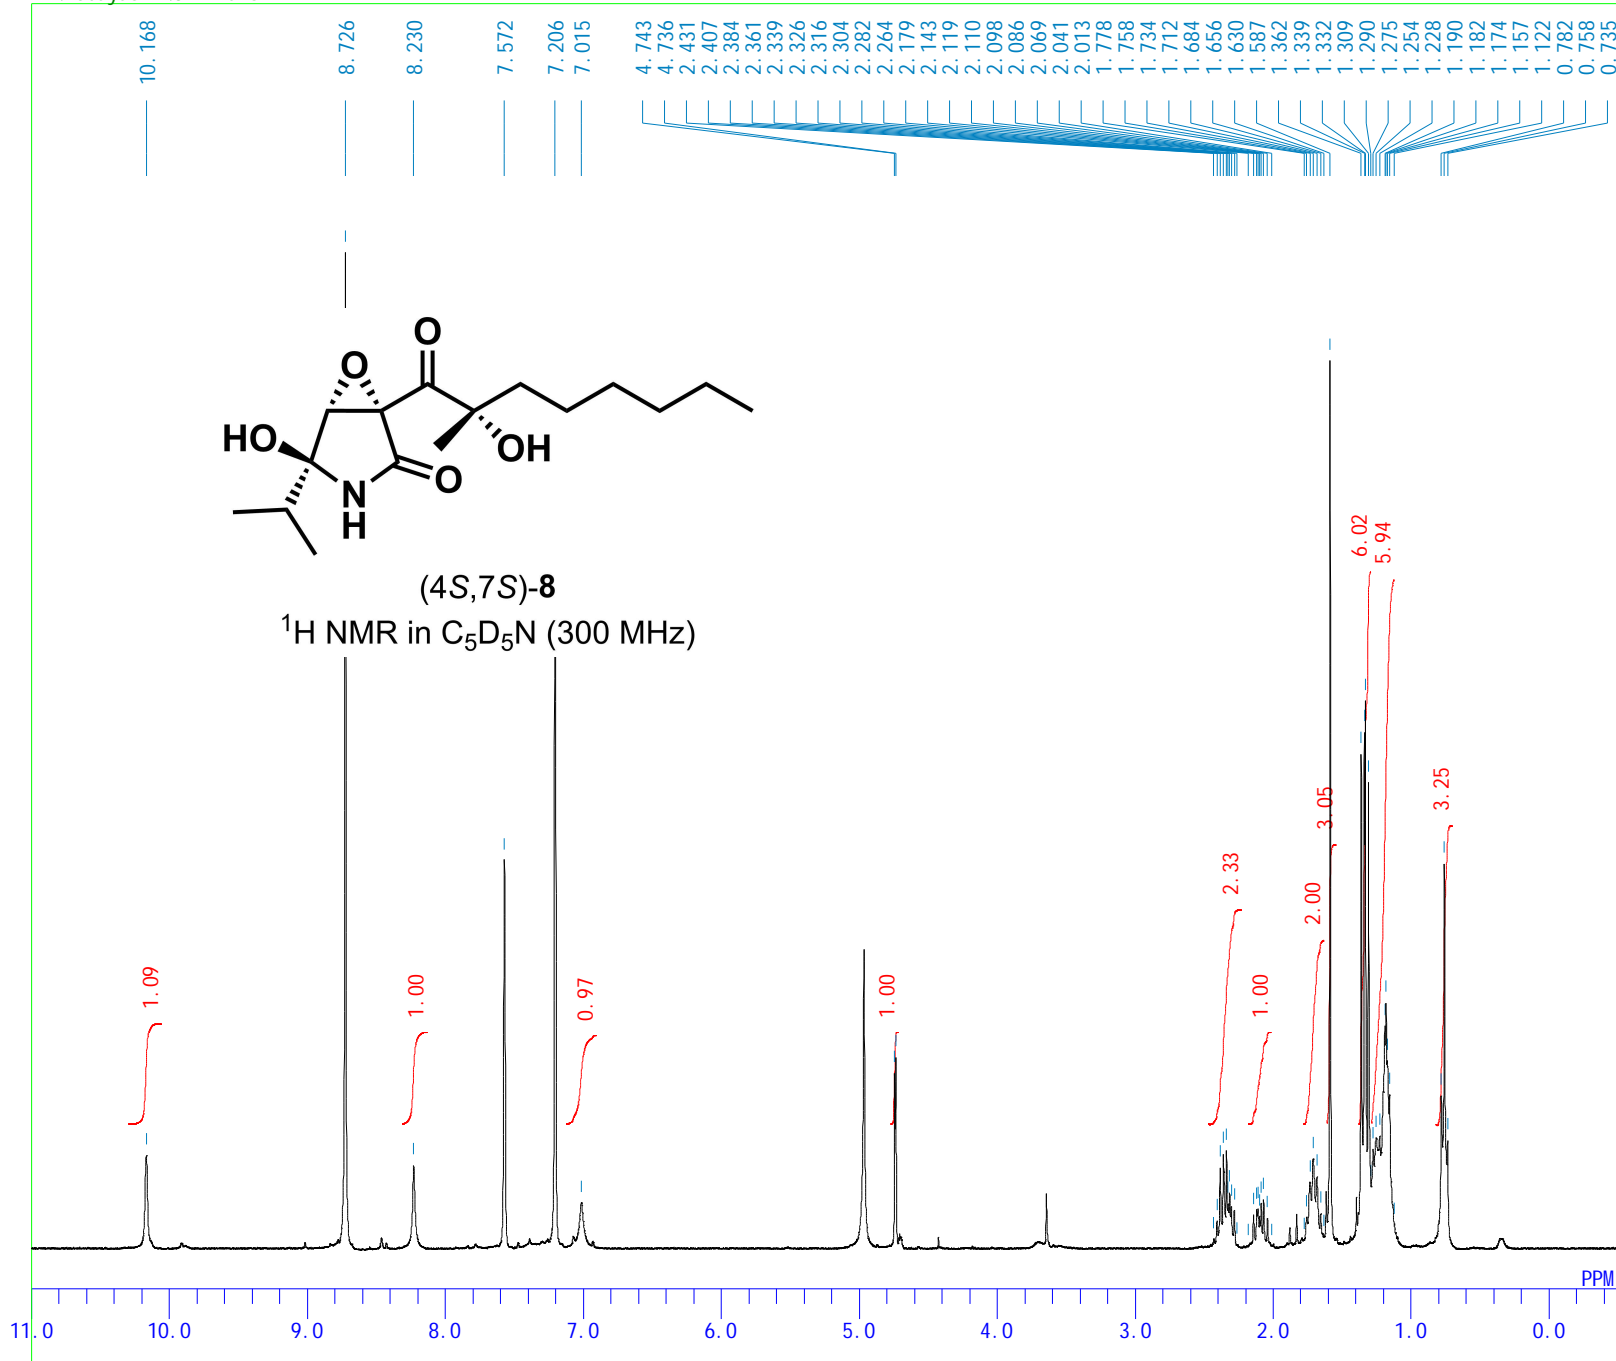

DFILE 8-1H.als  
 COMNT 8-1H  
 DATIM Wed Feb 13 17:55:11 2019  
 OBNUC 1H  
 EXMOD NON  
 OBFRO 300.40 MHz  
 OBSET 130.00 KHz  
 OBFIN 1150.00 Hz  
 POINT 32768  
 FREQU 6006.01 Hz  
 SCANS 16  
 ACQTM 5.4559 sec  
 PD 1.5440 sec  
 PW1 5.20 usec  
 IRNUC 1H  
 CTEMP 24.7 c  
 SLVNT C5D5N  
 EXREF 8.73 ppm  
 BF 0.12 Hz  
 RGAIN 17

C:\Documents and Settings\Thermo\Desktop\8-13C.ALS

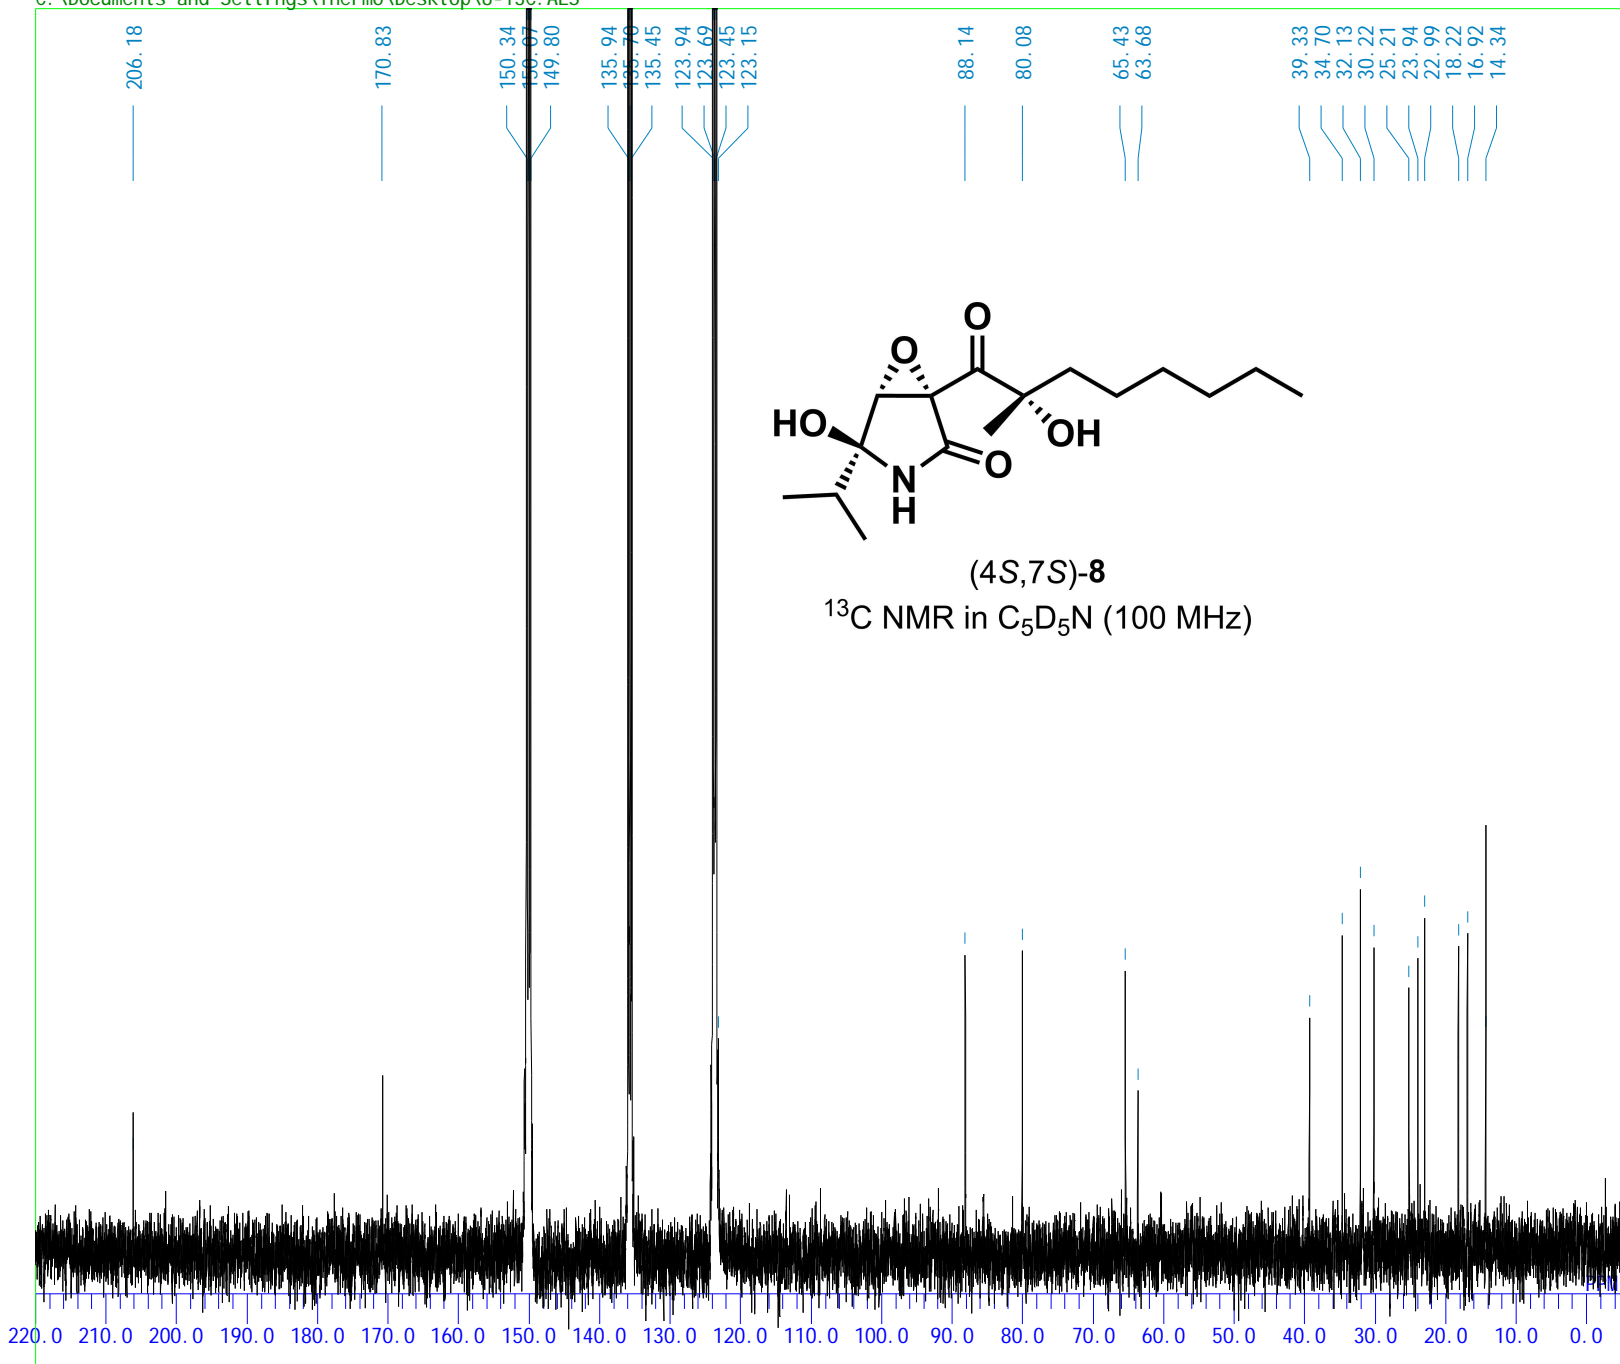

DFILE 8-13C.ALS  
 COMNT 8-13C  
 DATIM Sat Feb 16 11:00:00 2019  
 OBNUC  $^{13}\text{C}$   
 EXMOD BCM  
 OBFRO 100.40 MHz  
 OBSET 125.00 KHz  
 OBFIN 10500.00 Hz  
 POINT 32768  
 FREQU 27118.64 Hz  
 SCANS 1949  
 ACQTM 1.2083 sec  
 PD 1.7920 sec  
 PW1 5.80 usec  
 IRNUC 1H  
 CTEMP 23.3 c  
 SLVNT CDCL3  
 EXREF 150.07 ppm  
 BF 1.20 Hz  
 RGAIN 23

F:\kobayashi\9-1H.als

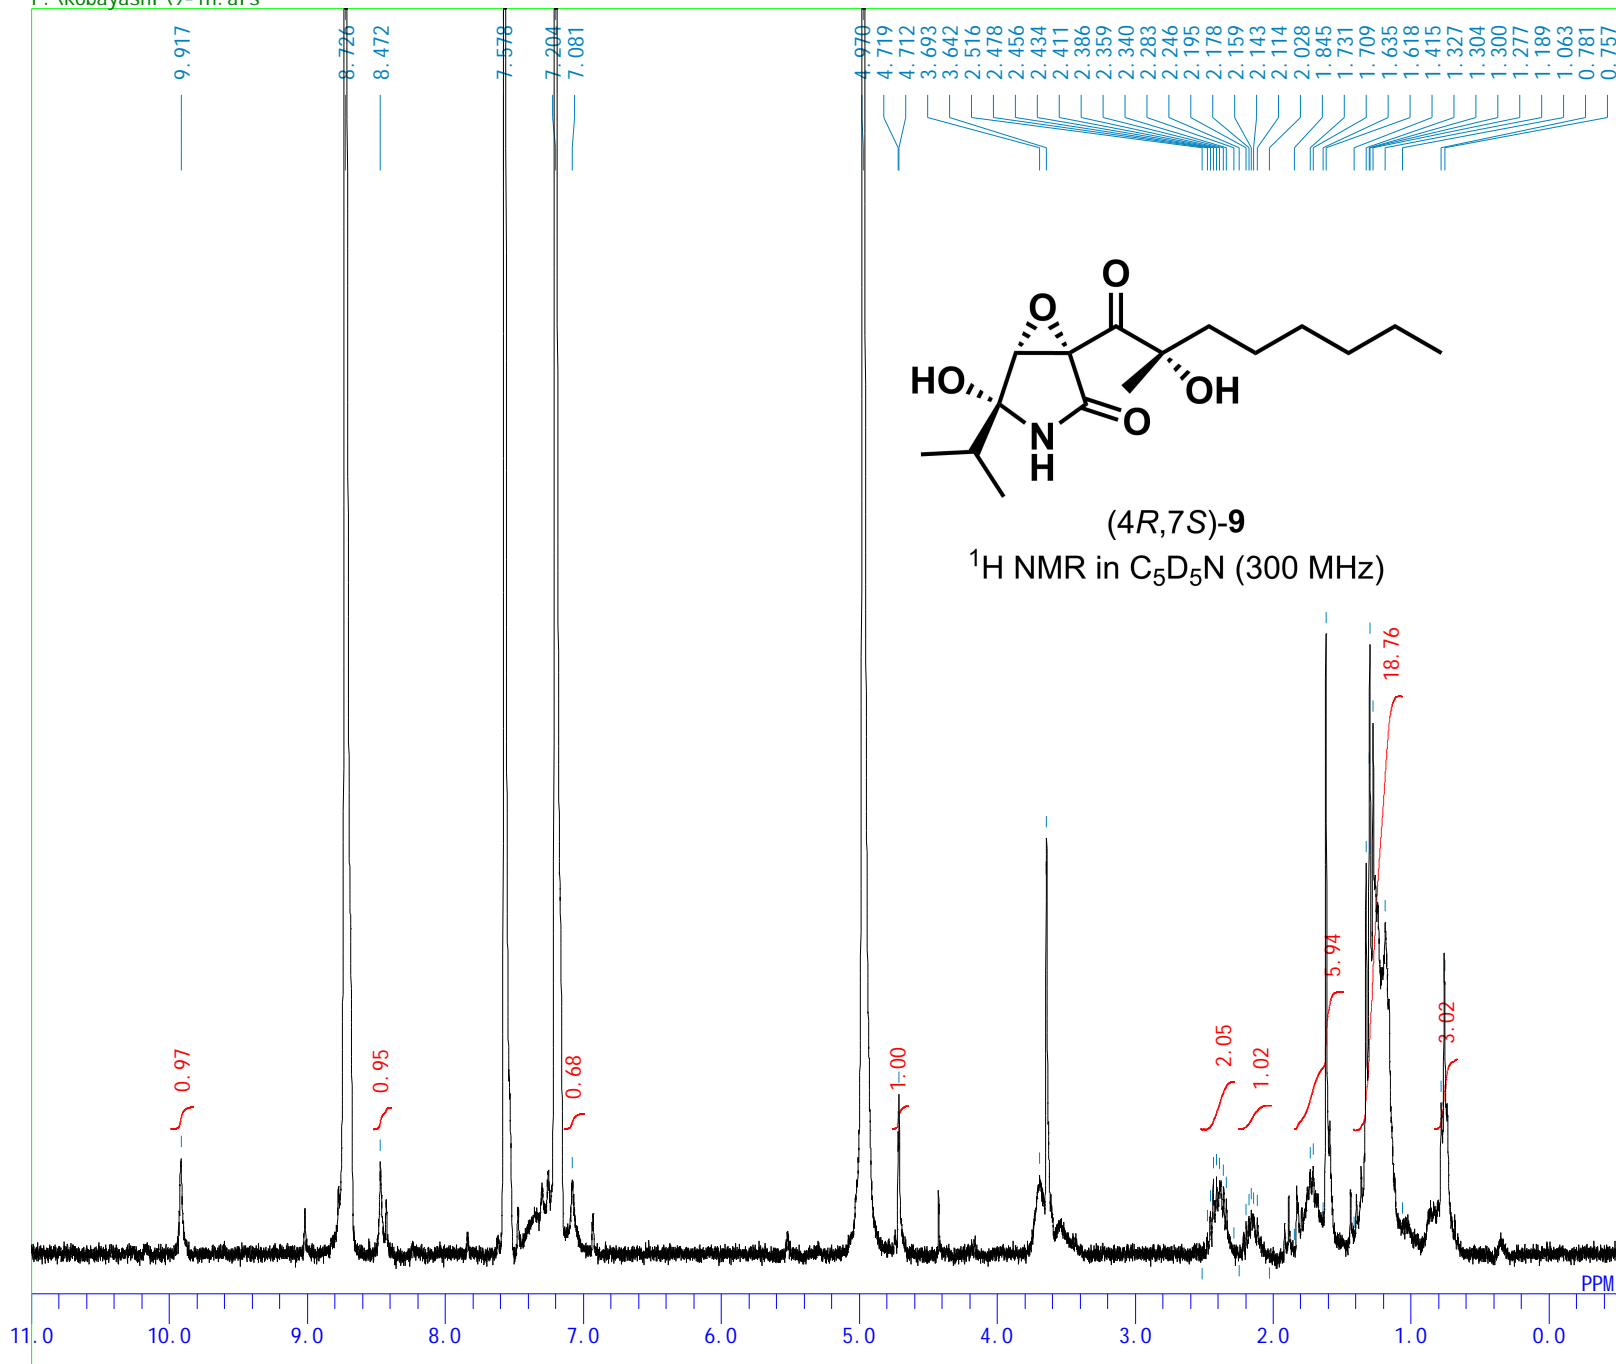

DFILE 9-1H.als  
 COMNT 9-1H  
 DATIM Wed Feb 13 18:01:45 2019  
 OBNUC 1H  
 EXMOD NON  
 OBFRO 300.40 MHz  
 OBSET 130.00 KHz  
 OBFIN 1150.00 Hz  
 POINT 32768  
 FREQU 6006.01 Hz  
 SCANS 16  
 ACQTM 5.4559 sec  
 PD 1.5440 sec  
 PW1 5.20 usec  
 IRNUC 1H  
 CTEMP 23.9 c  
 SLVNT C5D5N  
 EXREF 8.73 ppm  
 BF 0.12 Hz  
 RGA IN 19

C:\Documents and Settings\Thermo\Desktop\9-13C.als

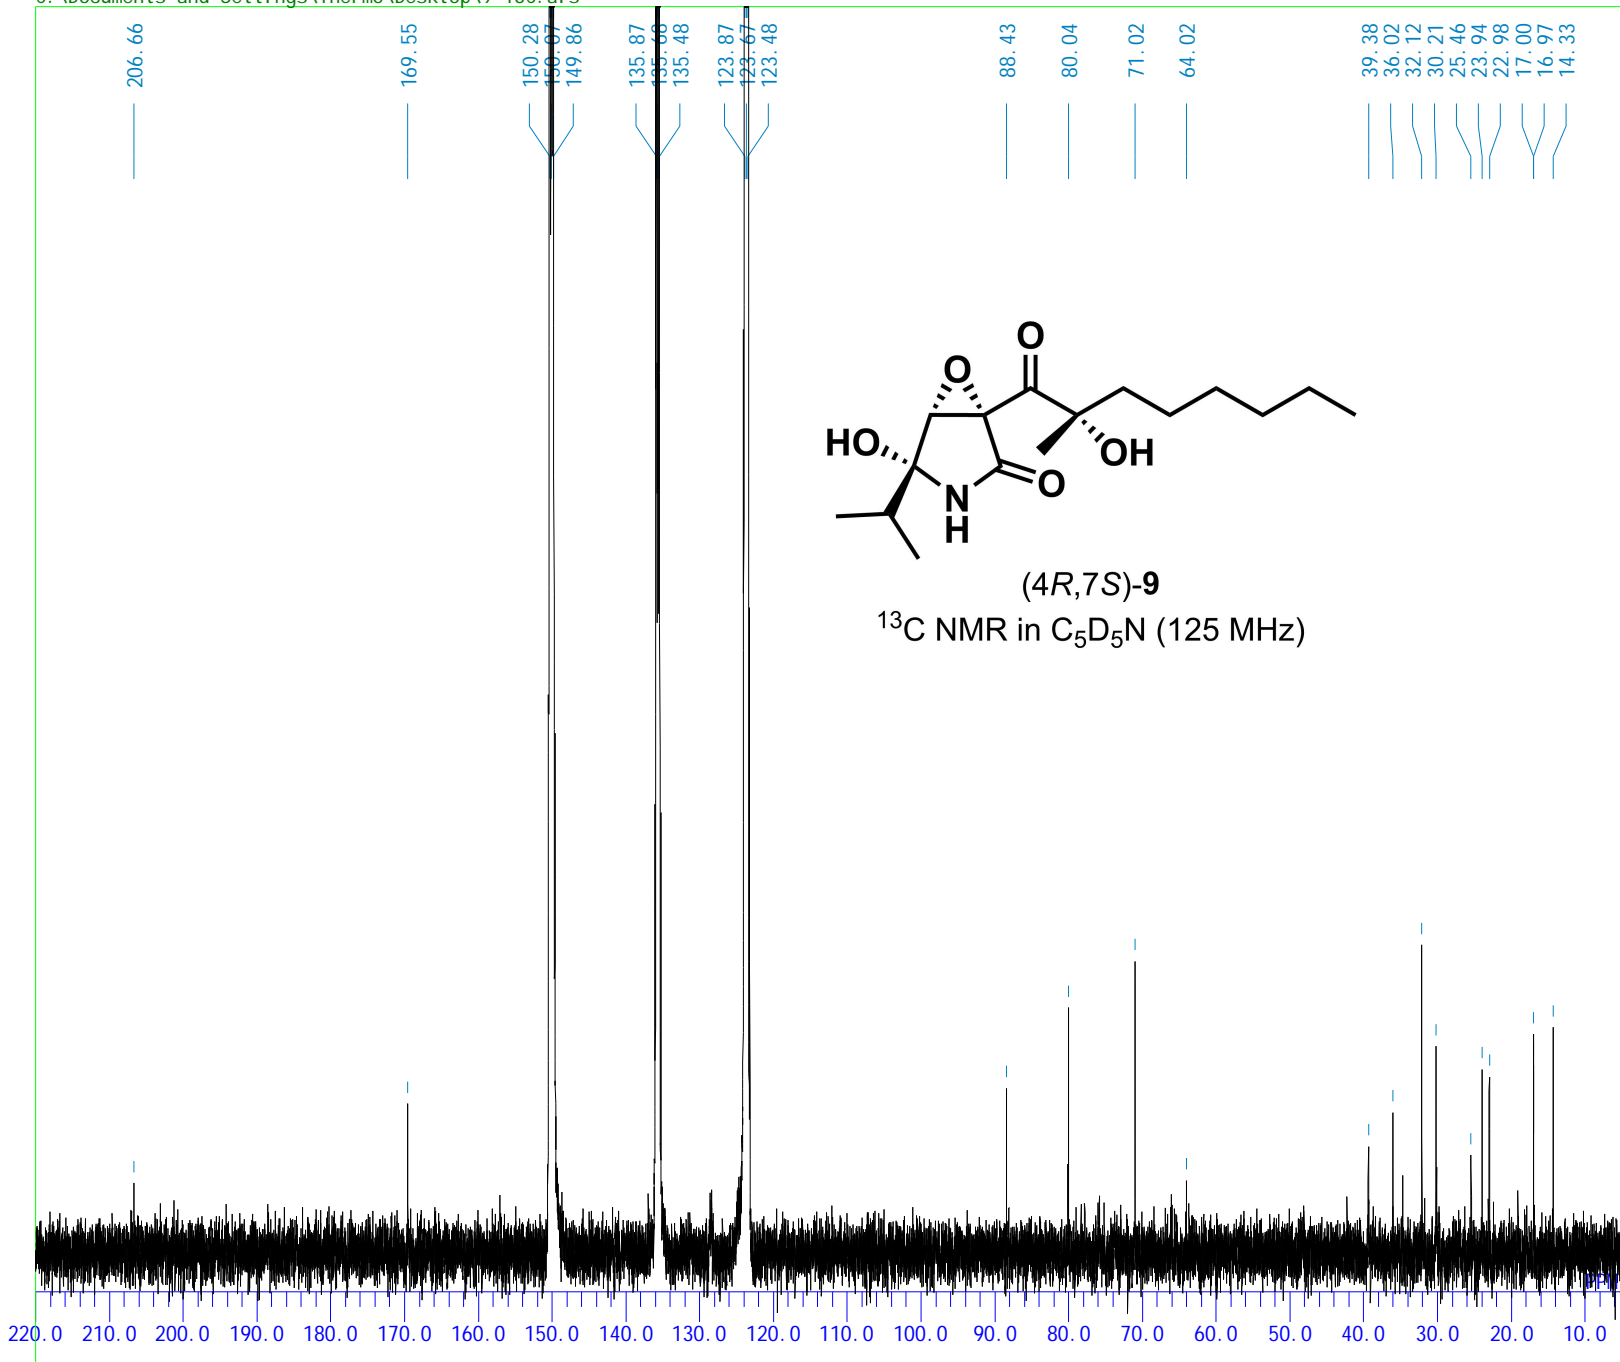

DFILE 9-13C.als  
 COMNT 9-13C  
 DATIM Fri Feb 15 18:53:16 2019  
 OBNUC 13C  
 EXMOD bcm  
 OBFRO 125.65 MHz  
 OBSET 120.00 KHz  
 OBFIN 7958.00 Hz  
 POINT 32768  
 FREQU 33898.30 Hz  
 SCANS 27000  
 ACQTM 0.9667 sec  
 PD 2.0333 sec  
 PW1 4.90 usec  
 IRNUC 1H  
 CTEMP 28.7 c  
 SLVNT C5D5N  
 EXREF 150.07 ppm  
 BF 0.12 Hz  
 RGAIN 27

F:\kobayashi\10-1H.als

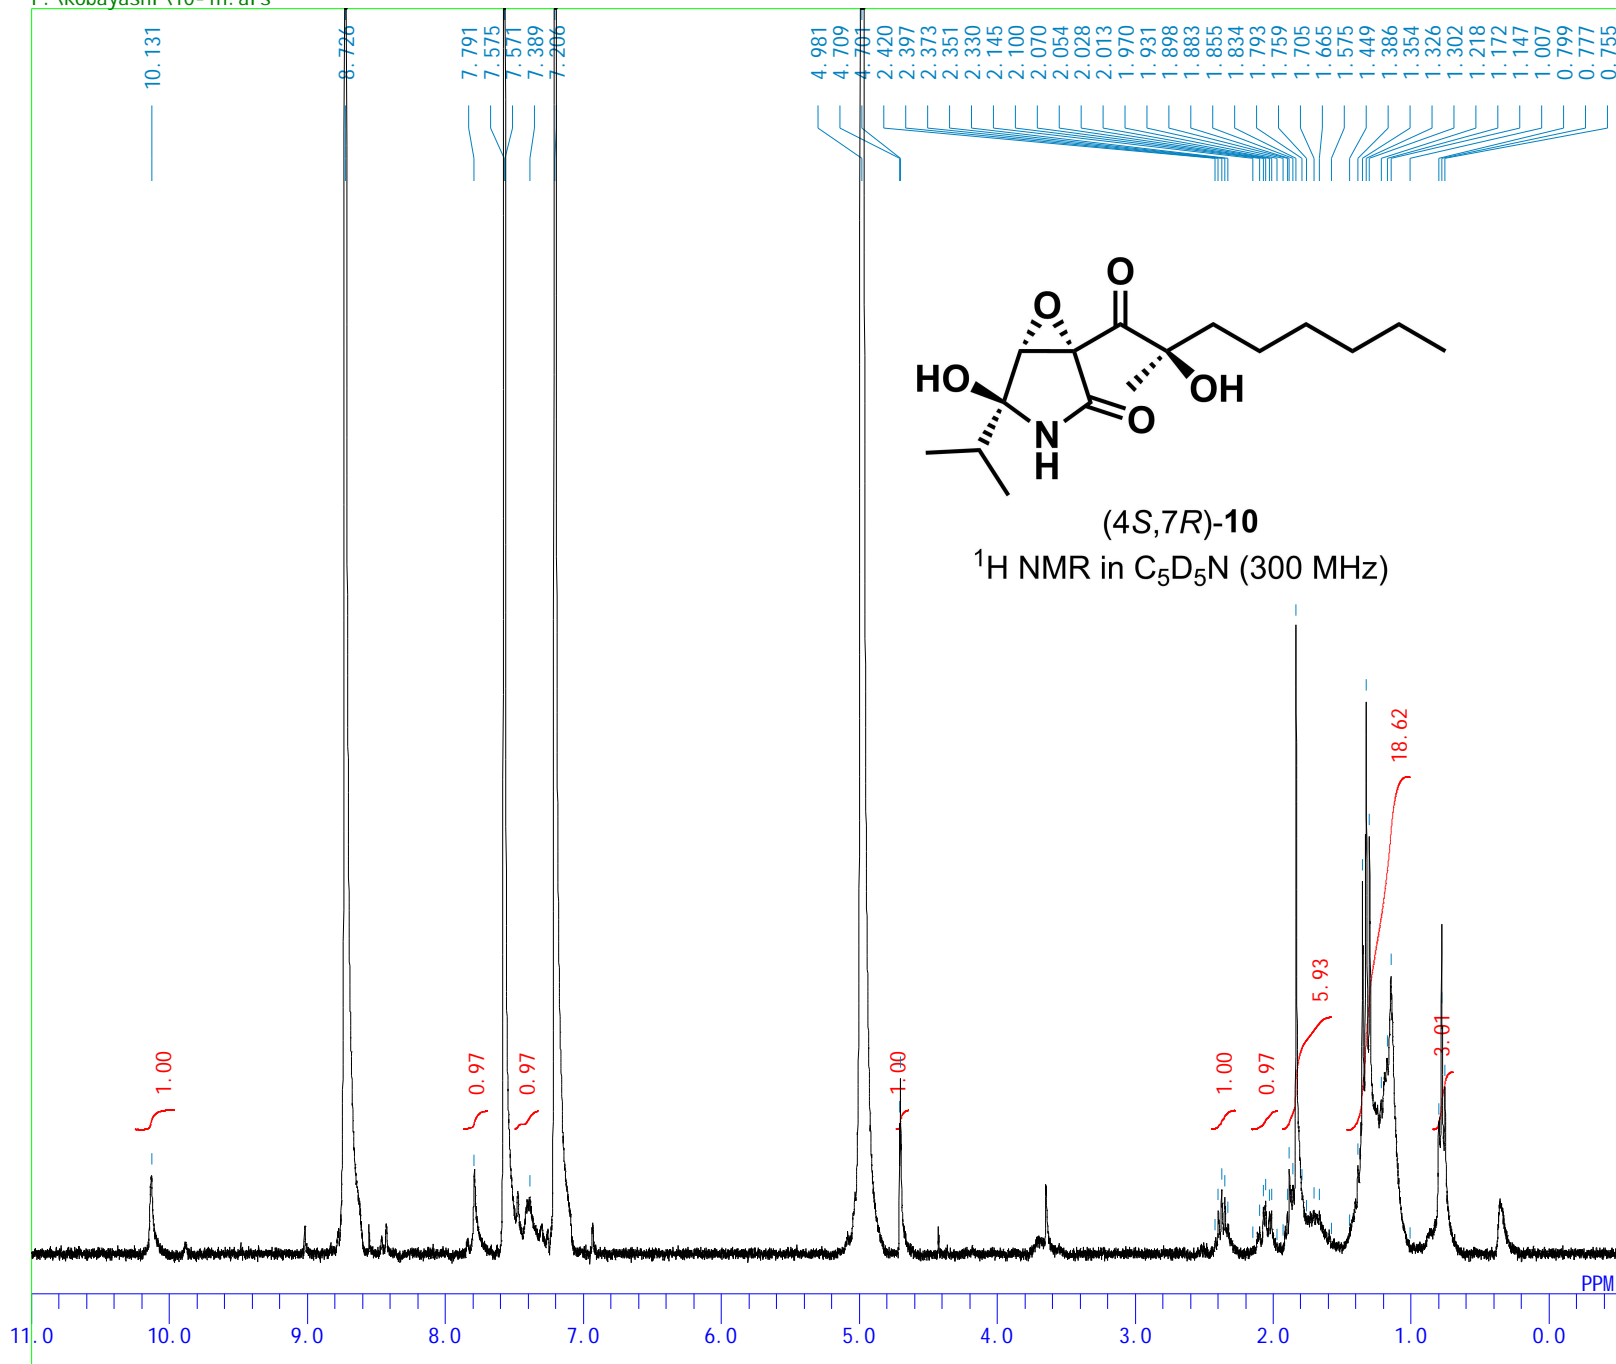

DFILE 10-1H.als  
 COMNT 10-1H  
 DATIM Wed Feb 13 17:47:49 2019  
 OBNUC 1H  
 EXMOD NON  
 OBFRO 300.40 MHz  
 OBSET 130.00 KHz  
 OBFIN 1150.00 Hz  
 POINT 32768  
 FREQU 6006.01 Hz  
 SCANS 16  
 ACQTM 5.4559 sec  
 PD 1.5440 sec  
 PW1 5.20 usec  
 IRNUC 1H  
 CTEMP 25.1 c  
 SLVNT C5D5N  
 EXREF 8.73 ppm  
 BF 0.12 Hz  
 RGA IN 19

C:\Documents and Settings\Thermo\Desktop\10-13C.a1s

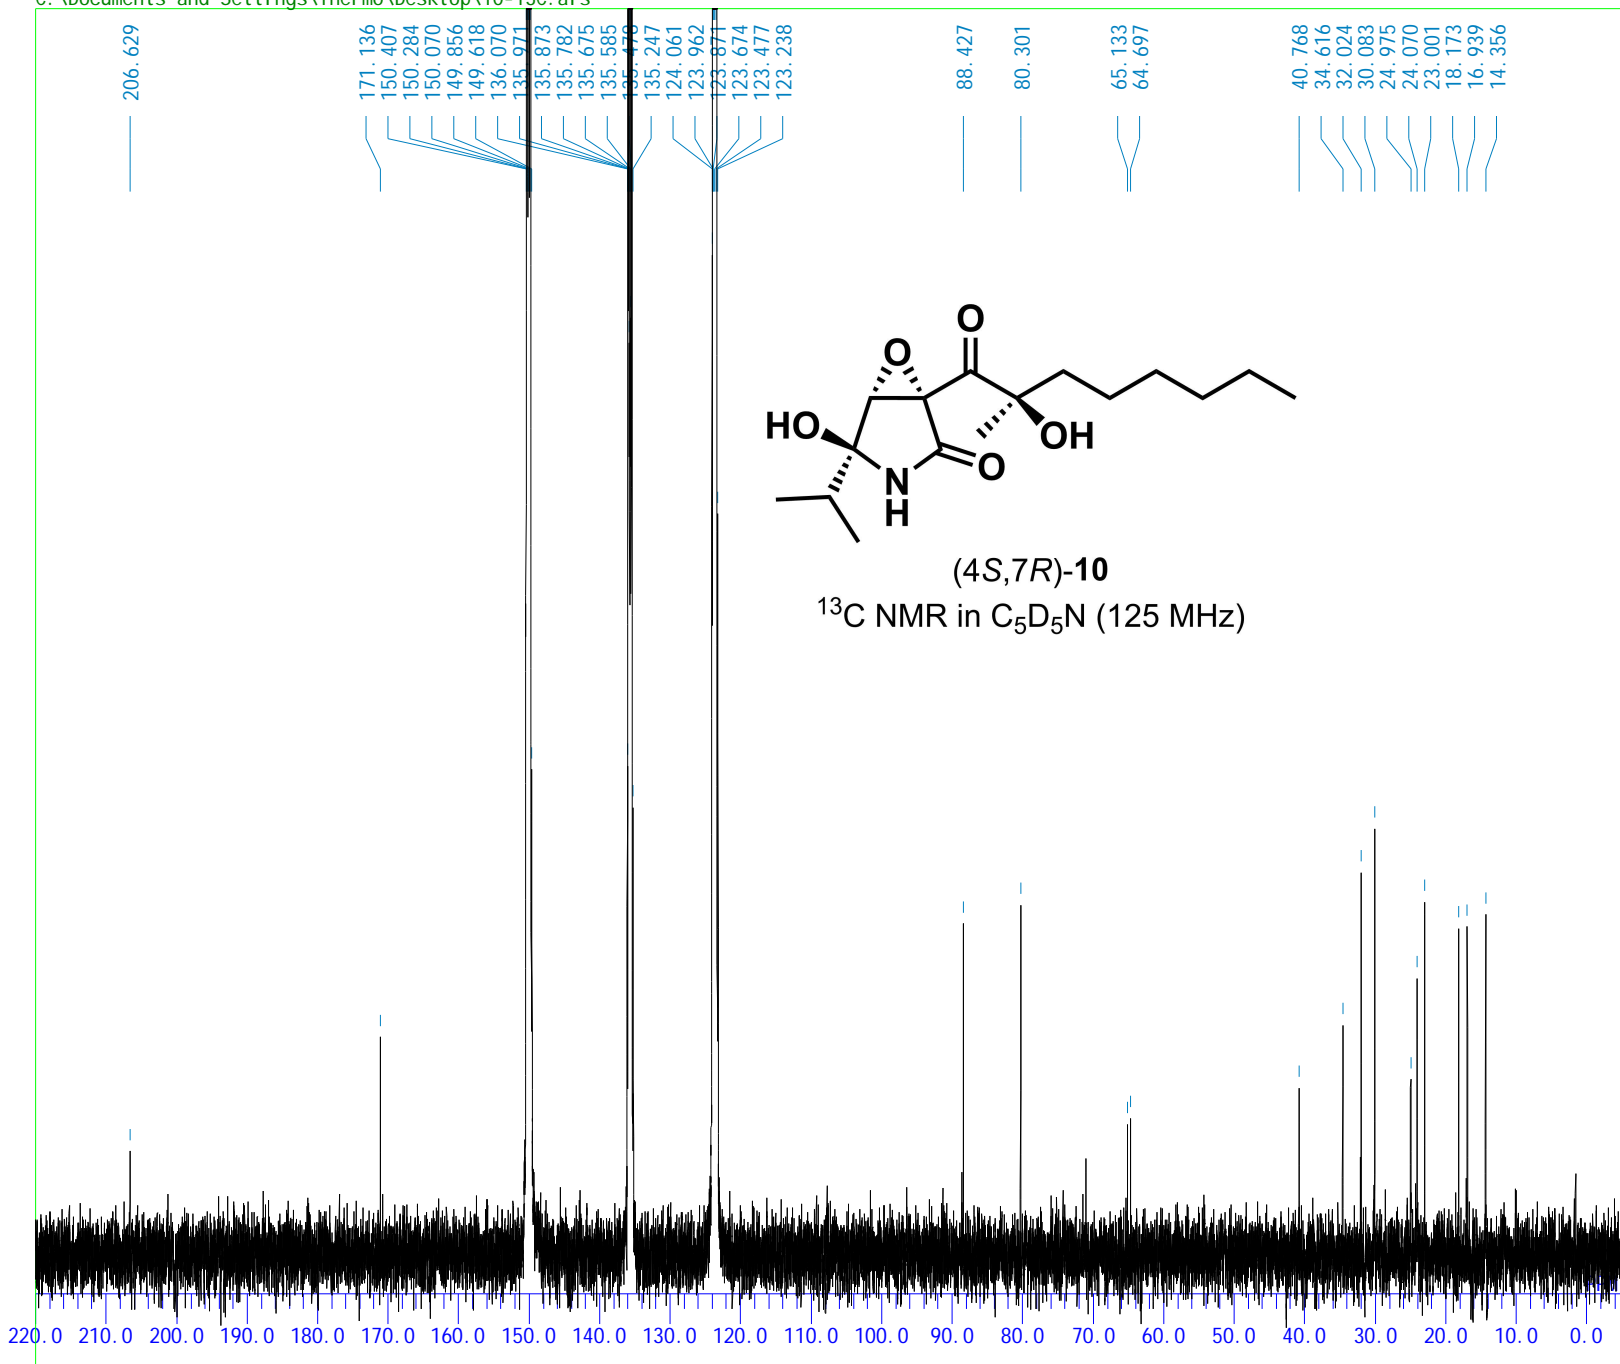

|       |                         |
|-------|-------------------------|
| DFILE | 10-13C.a1s              |
| COMNT | 10-13C                  |
| DATIM | Mon Feb 4 18:23:14 2019 |
| OBNUC | 13C                     |
| EXMOD | bcm                     |
| OBFRQ | 125.65 MHz              |
| OBSET | 120.00 KHz              |
| OBFIN | 7958.00 Hz              |
| POINT | 32768                   |
| FREQU | 33898.30 Hz             |
| SCANS | 24000                   |
| ACQTM | 0.9667 sec              |
| PD    | 2.0333 sec              |
| PW1   | 4.90 usec               |
| IRNUC | 1H                      |
| CTEMP | 28.0 c                  |
| SLVNT | C5D5N                   |
| EXREF | 150.07 ppm              |
| BF    | 0.12 Hz                 |
| RGAIN | 27                      |

F:\kobayashi\11-1H.als

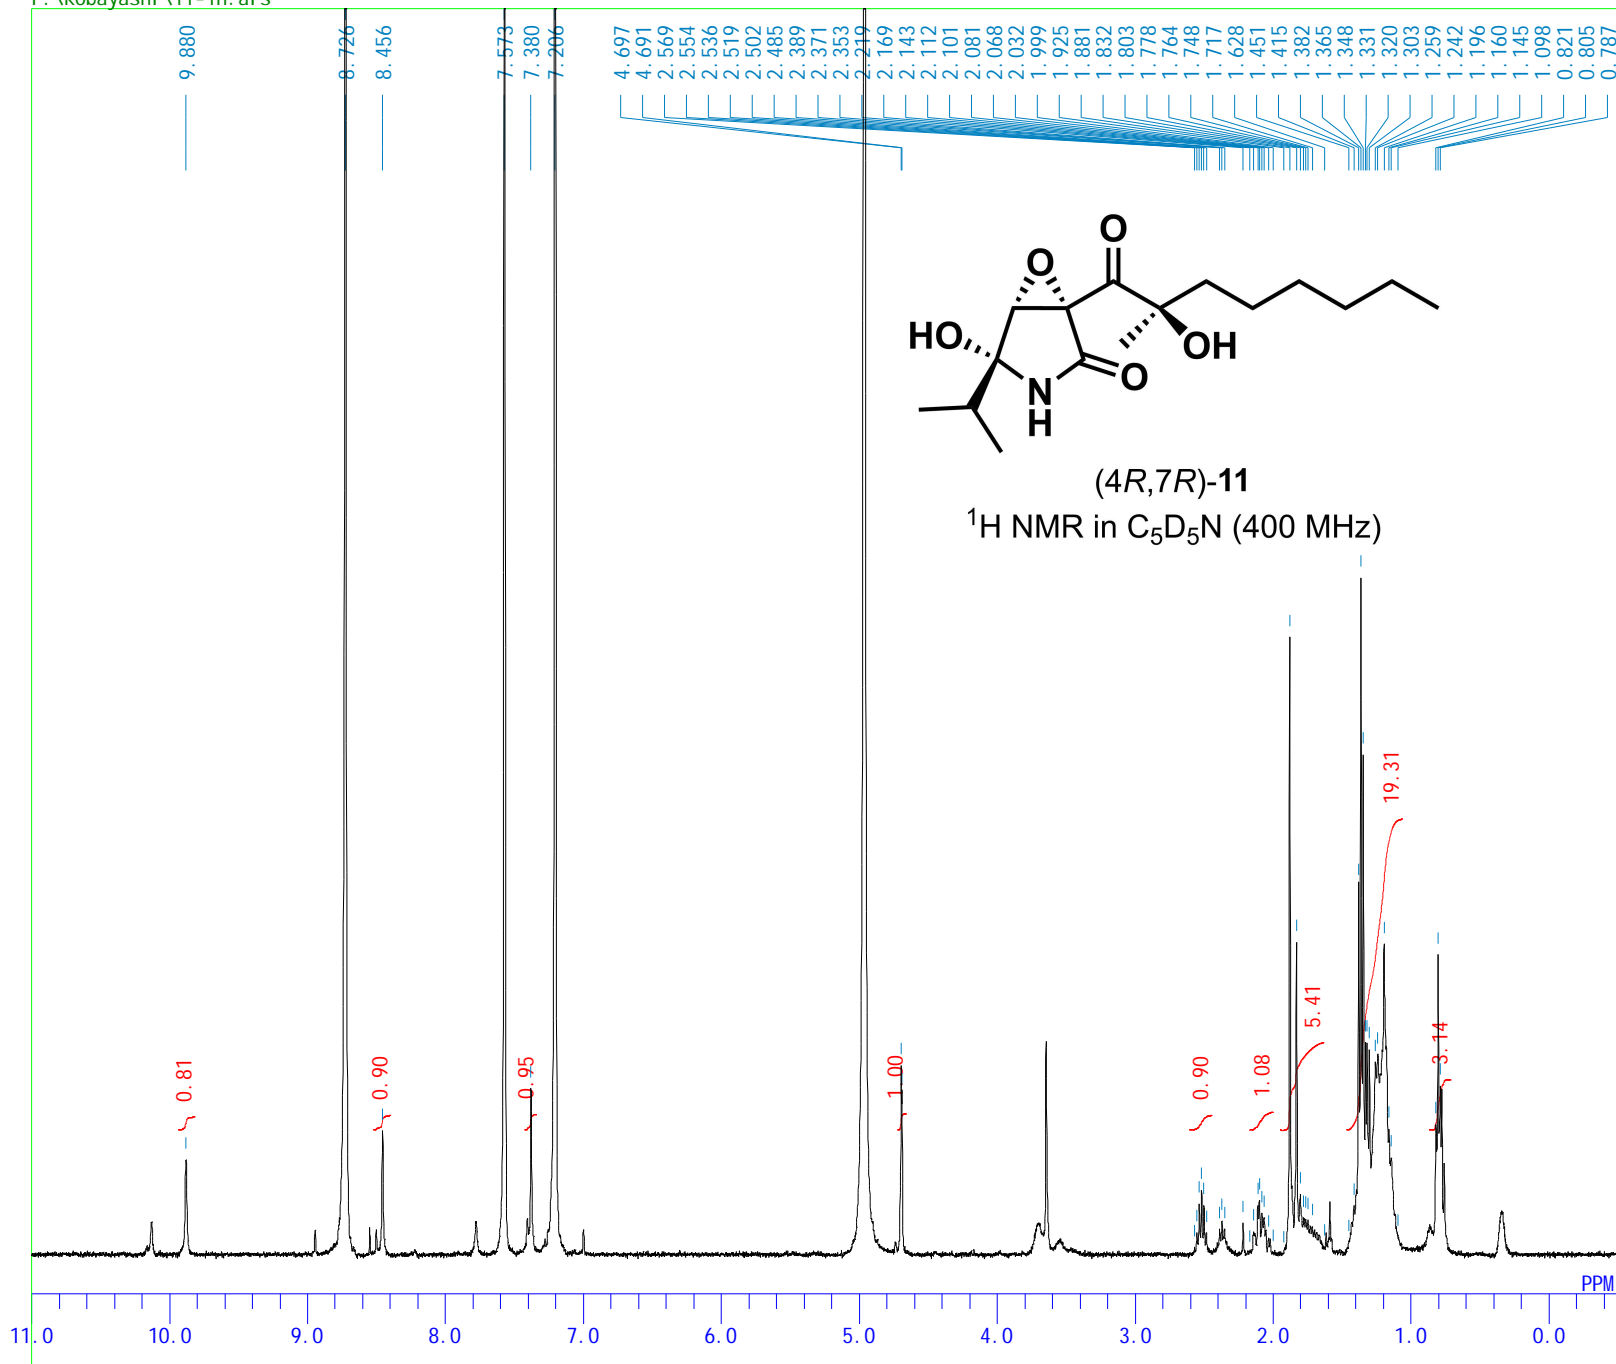

DFILE 11-1H.als  
 COMNT 11-1H  
 DATIM Mon Feb 25 17:23:11 2019  
 OBNUC 1H  
 EXMOD NON  
 OBFRQ 399.65 MHz  
 OBSET 124.00 KHz  
 OBFIN 10500.00 Hz  
 POINT 16384  
 FREQU 7992.01 Hz  
 SCANS 16  
 ACQTM 2.0500 sec  
 PD 4.9500 sec  
 PW1 5.80 usec  
 IRNUC 1H  
 CTEMP 23.9 c  
 SLVNT C5D5N  
 EXREF 8.73 ppm  
 BF 0.12 Hz  
 RGAIN 19



C:\Documents and Settings\Thermo\Desktop\9-13C.ALS

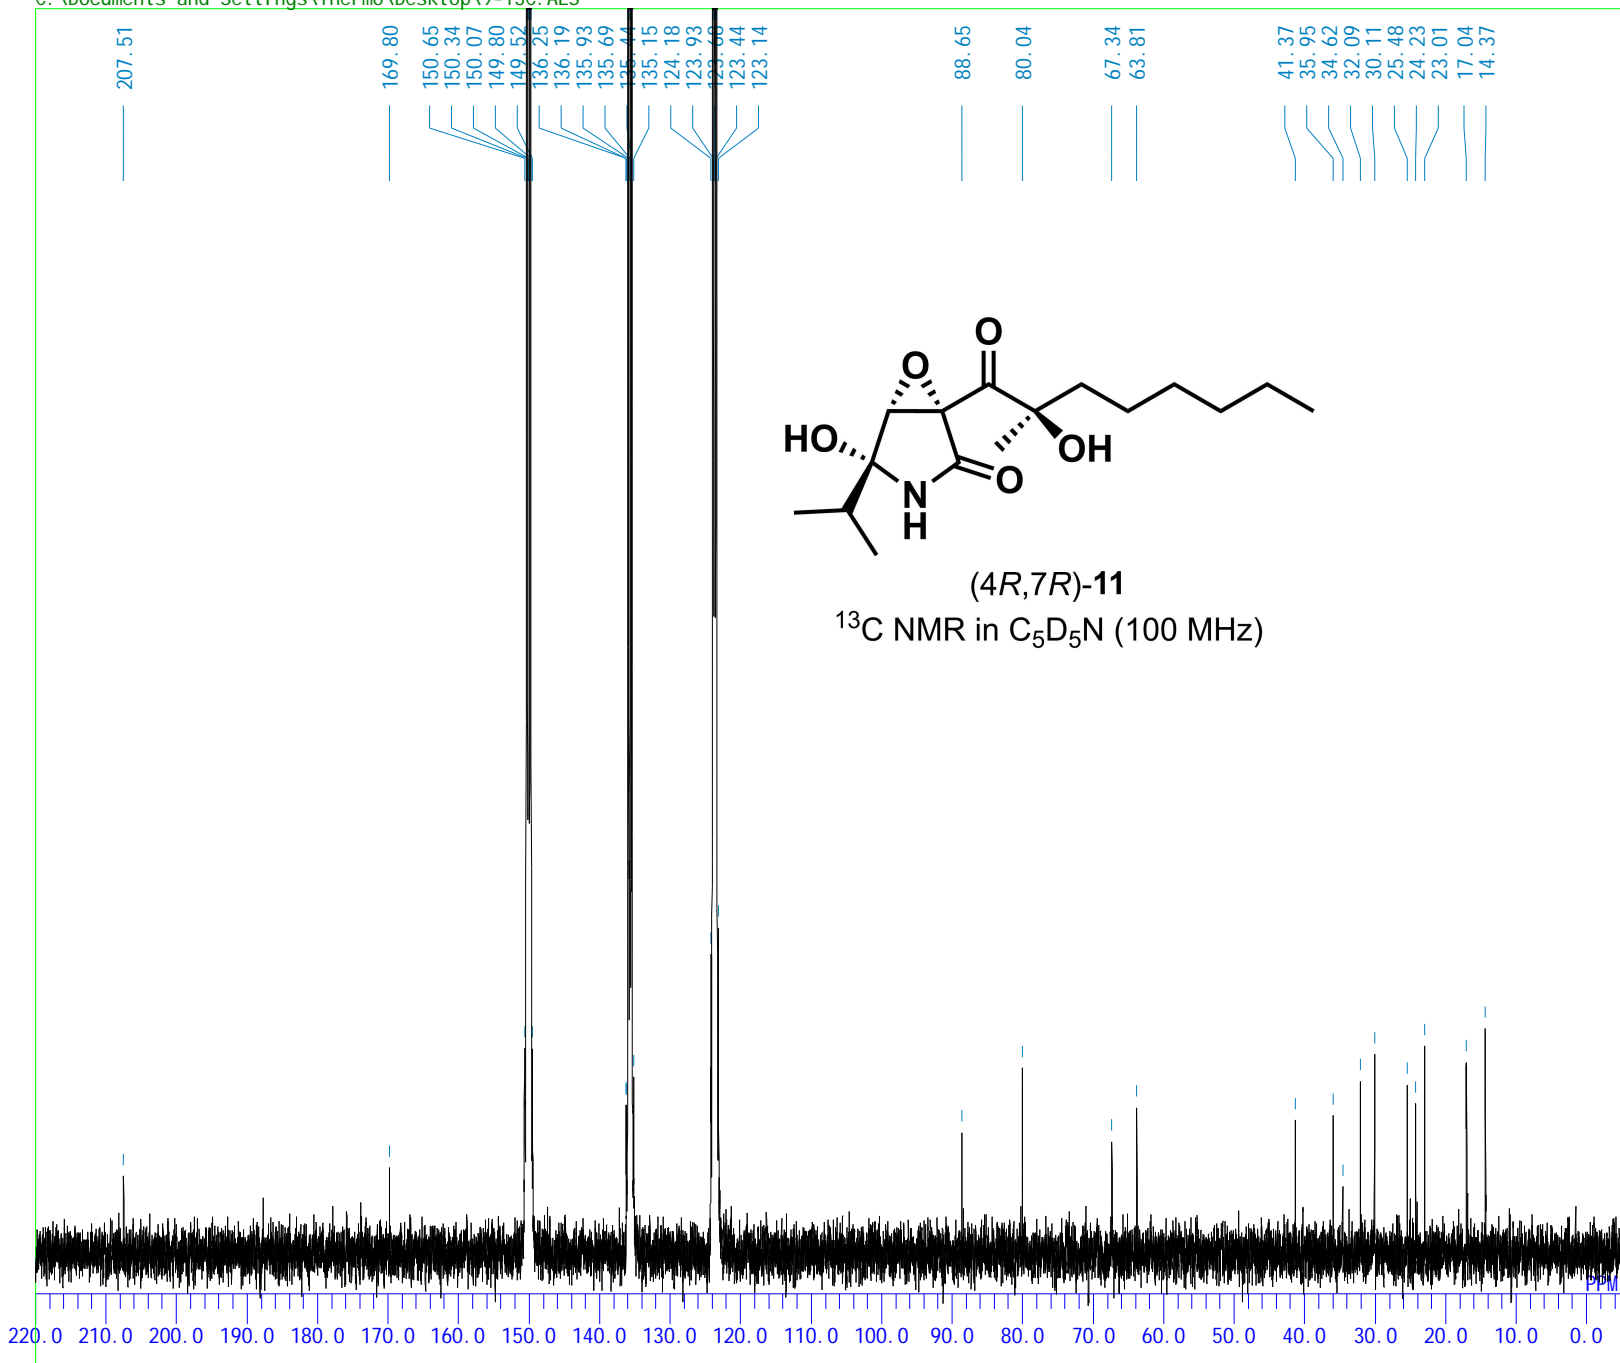

DFILE 9-13C.ALS  
 COMNT 11-13C  
 DATIM Sat Feb 16 19:21:32 2019  
 OBNUC  $^{13}\text{C}$   
 EXMOD BCM  
 OBFRQ 100.40 MHz  
 OBSET 125.00 KHz  
 OBFIN 10500.00 Hz  
 POINT 32768  
 FREQU 27118.64 Hz  
 SCANS 9889  
 ACQTM 1.2083 sec  
 PD 1.7920 sec  
 PW1 5.80 usec  
 IRNUC 1H  
 CTEMP 23.3 c  
 SLVNT  $\text{C}_5\text{D}_5\text{N}$   
 EXREF 150.07 ppm  
 BF 1.20 Hz  
 RGAIN 23

F:\kobayashi\12-1H.als

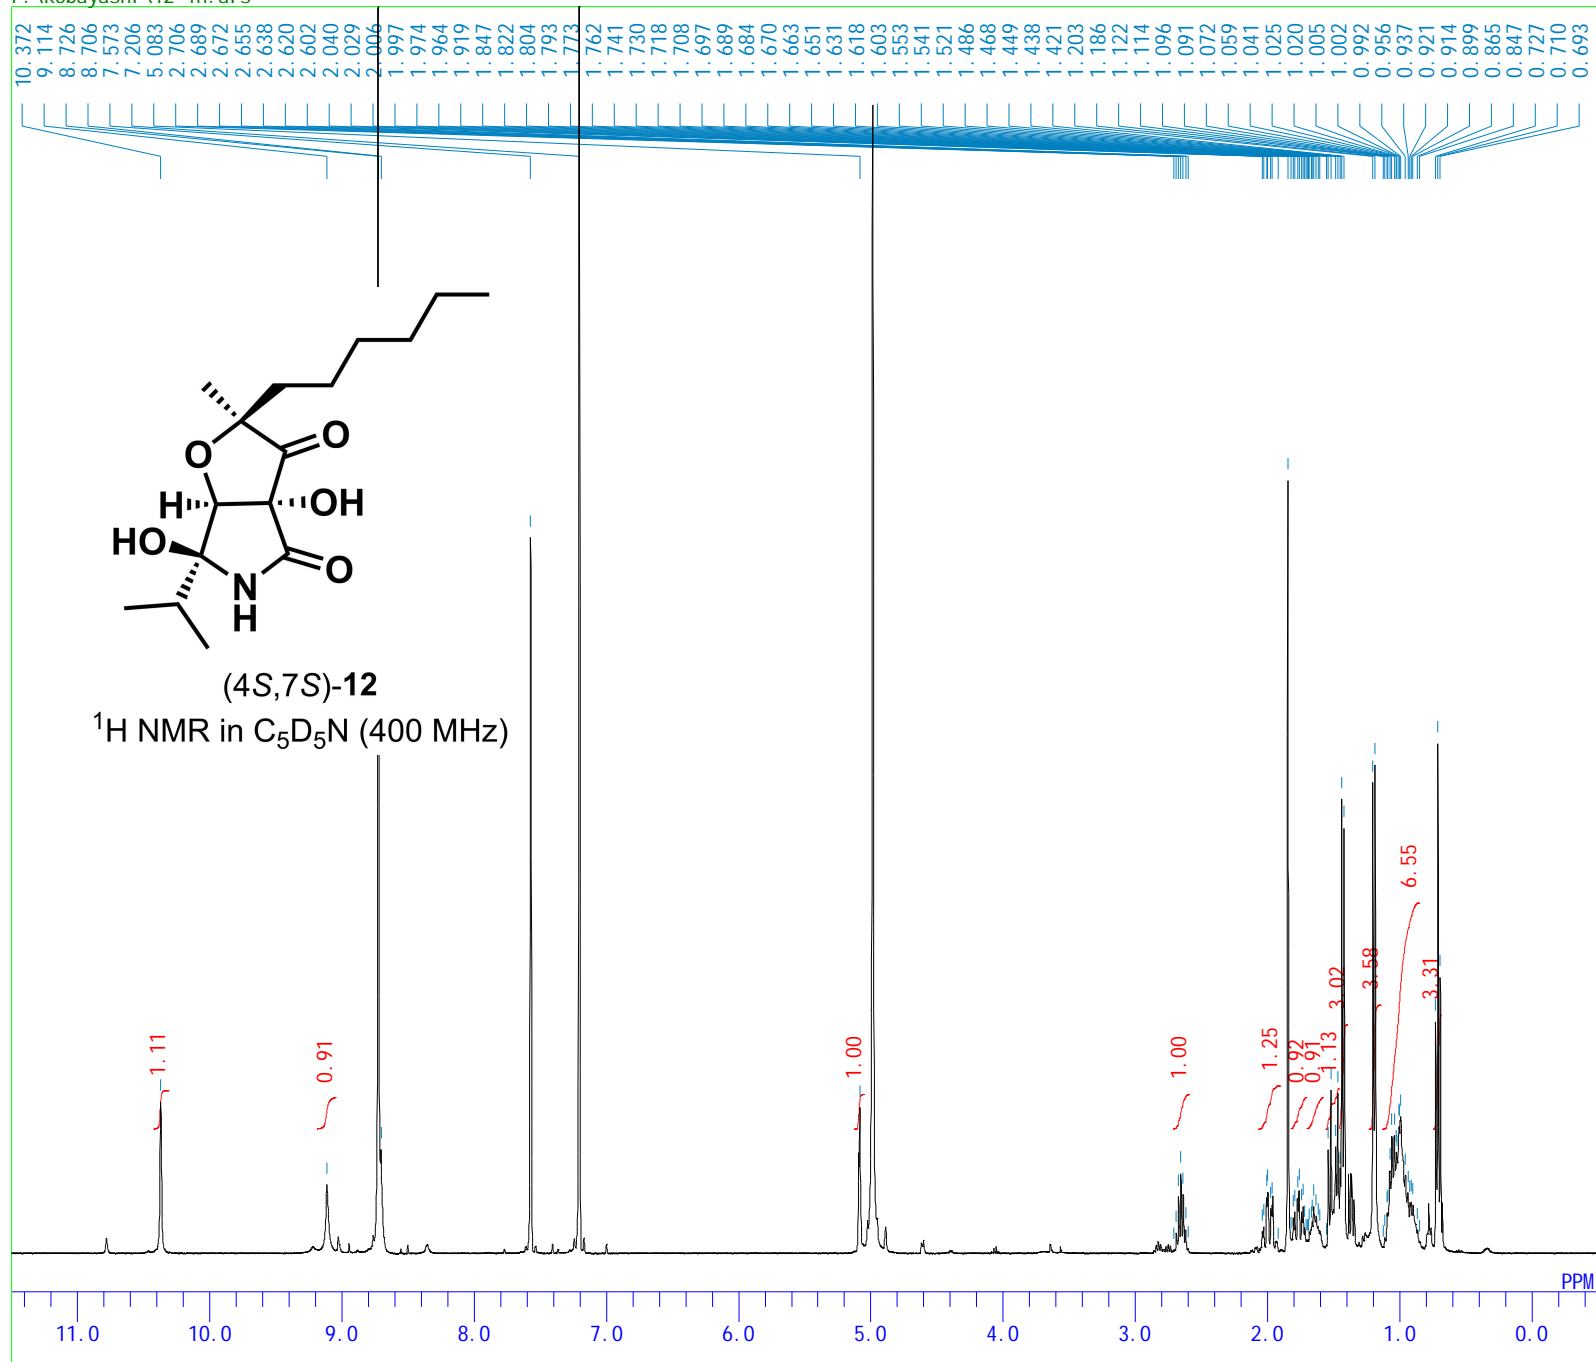

DFILE 12-1H.als  
 COMNT 12-1H  
 DATIM Mon Mar 05 15:05:29 2018  
 OBNUC 1H  
 EXMOD NON  
 OBFRO 399.65 MHz  
 OBSET 124.00 KHz  
 OBFIN 10500.00 Hz  
 POINT 16384  
 FREQU 7992.01 Hz  
 SCANS 64  
 ACQTM 2.0500 sec  
 PD 4.9500 sec  
 PW1 5.80 usec  
 IRNUC 1H  
 CTEMP 22.5 c  
 SLVNT C5D5N  
 EXREF 0.71 ppm  
 BF 0.12 Hz  
 RGAIN 19

C:\Documents and Settings\Thermo\Desktop\12-13C.a1s

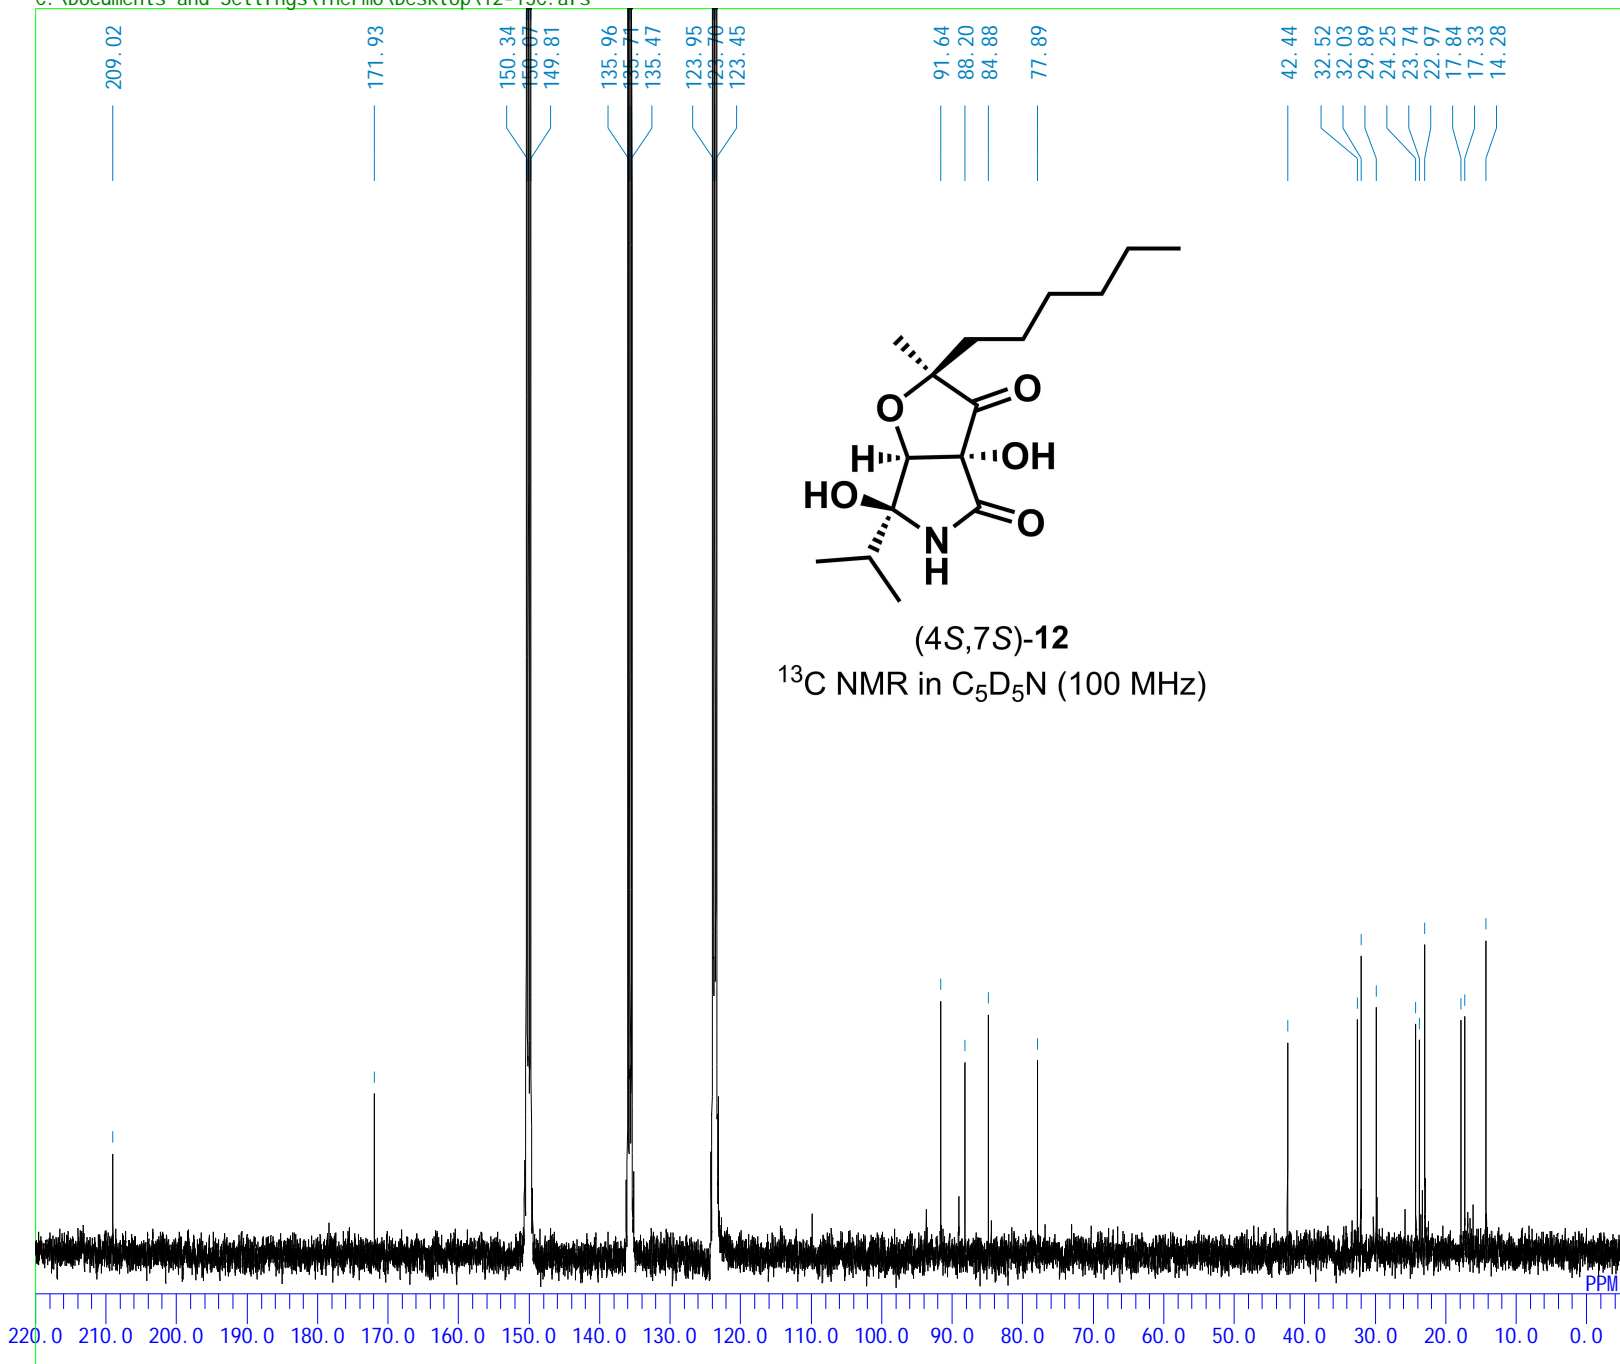

DFILE 12-13C.a1s  
 COMNT 12-13C  
 DATIM Mon Mar 05 16:50:51 2018  
 OBNUC <sup>13</sup>C  
 EXMOD BCM  
 OBFRO 100.40 MHz  
 OBSET 125.00 KHz  
 OBFIN 10500.00 Hz  
 POINT 32768  
 FREQU 27118.64 Hz  
 SCANS 2000  
 ACQTM 1.2083 sec  
 PD 1.7920 sec  
 PW1 5.80 usec  
 IRNUC 1H  
 CTEMP 22.1 c  
 SLVNT C5D5N  
 EXREF 150.07 ppm  
 BF 1.20 Hz  
 RGAIN 22

F:\kobayashi\14-1H.als

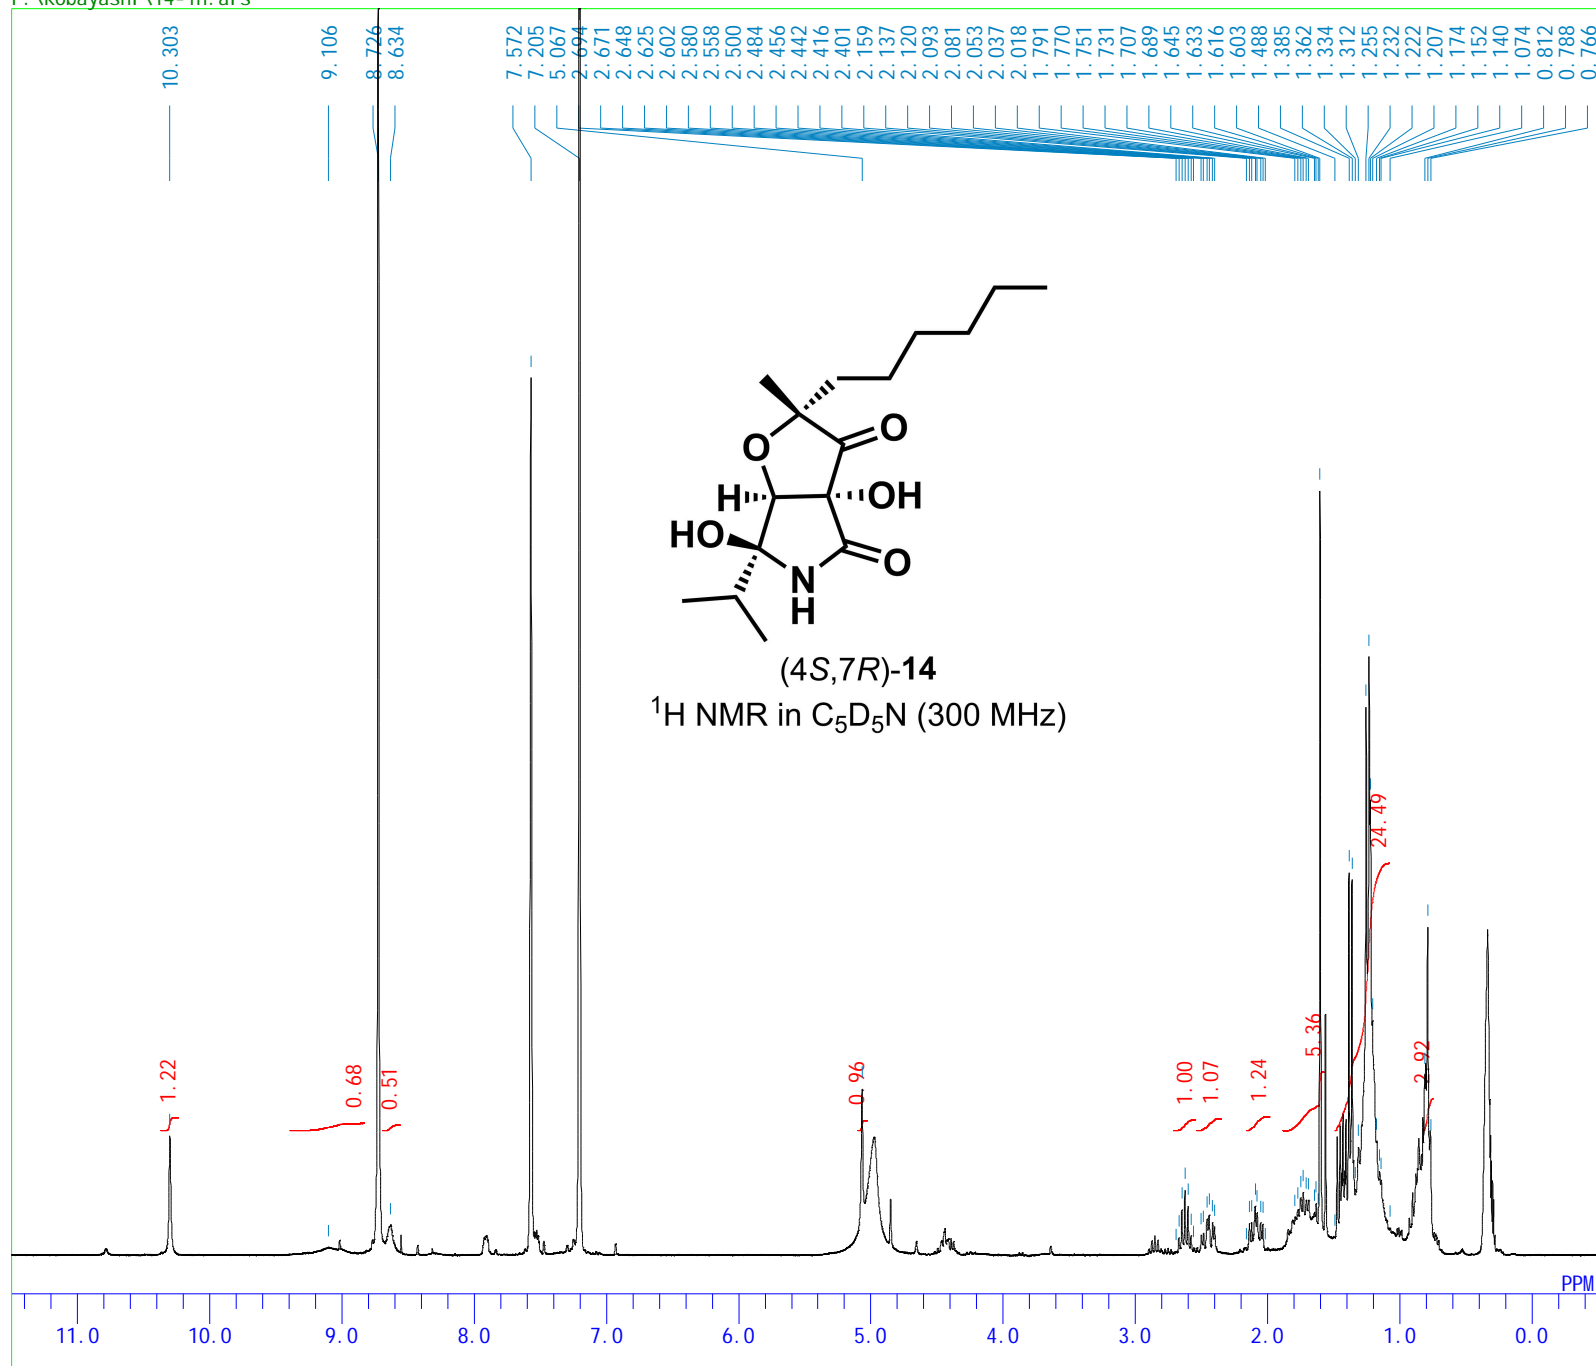

DFILE 14-1H.als  
 COMNT 14-1H  
 DATIM Wed Apr 11 15:47:07 2018  
 OBNUC 1H  
 EXMOD NON  
 OBFRQ 300.40 MHz  
 OBSET 130.00 KHz  
 OBFIN 1150.00 Hz  
 POINT 32768  
 FREQU 6006.01 Hz  
 SCANS 58  
 ACQTM 5.4559 sec  
 PD 1.5440 sec  
 PW1 5.20 usec  
 IRNUC 1H  
 CTEMP 23.4 c  
 SLVNT C5D5N  
 EXREF 8.73 ppm  
 BF 0.12 Hz  
 RGAIN 17

C:\Documents and Settings\Thermo\Desktop\14-13C.a1s

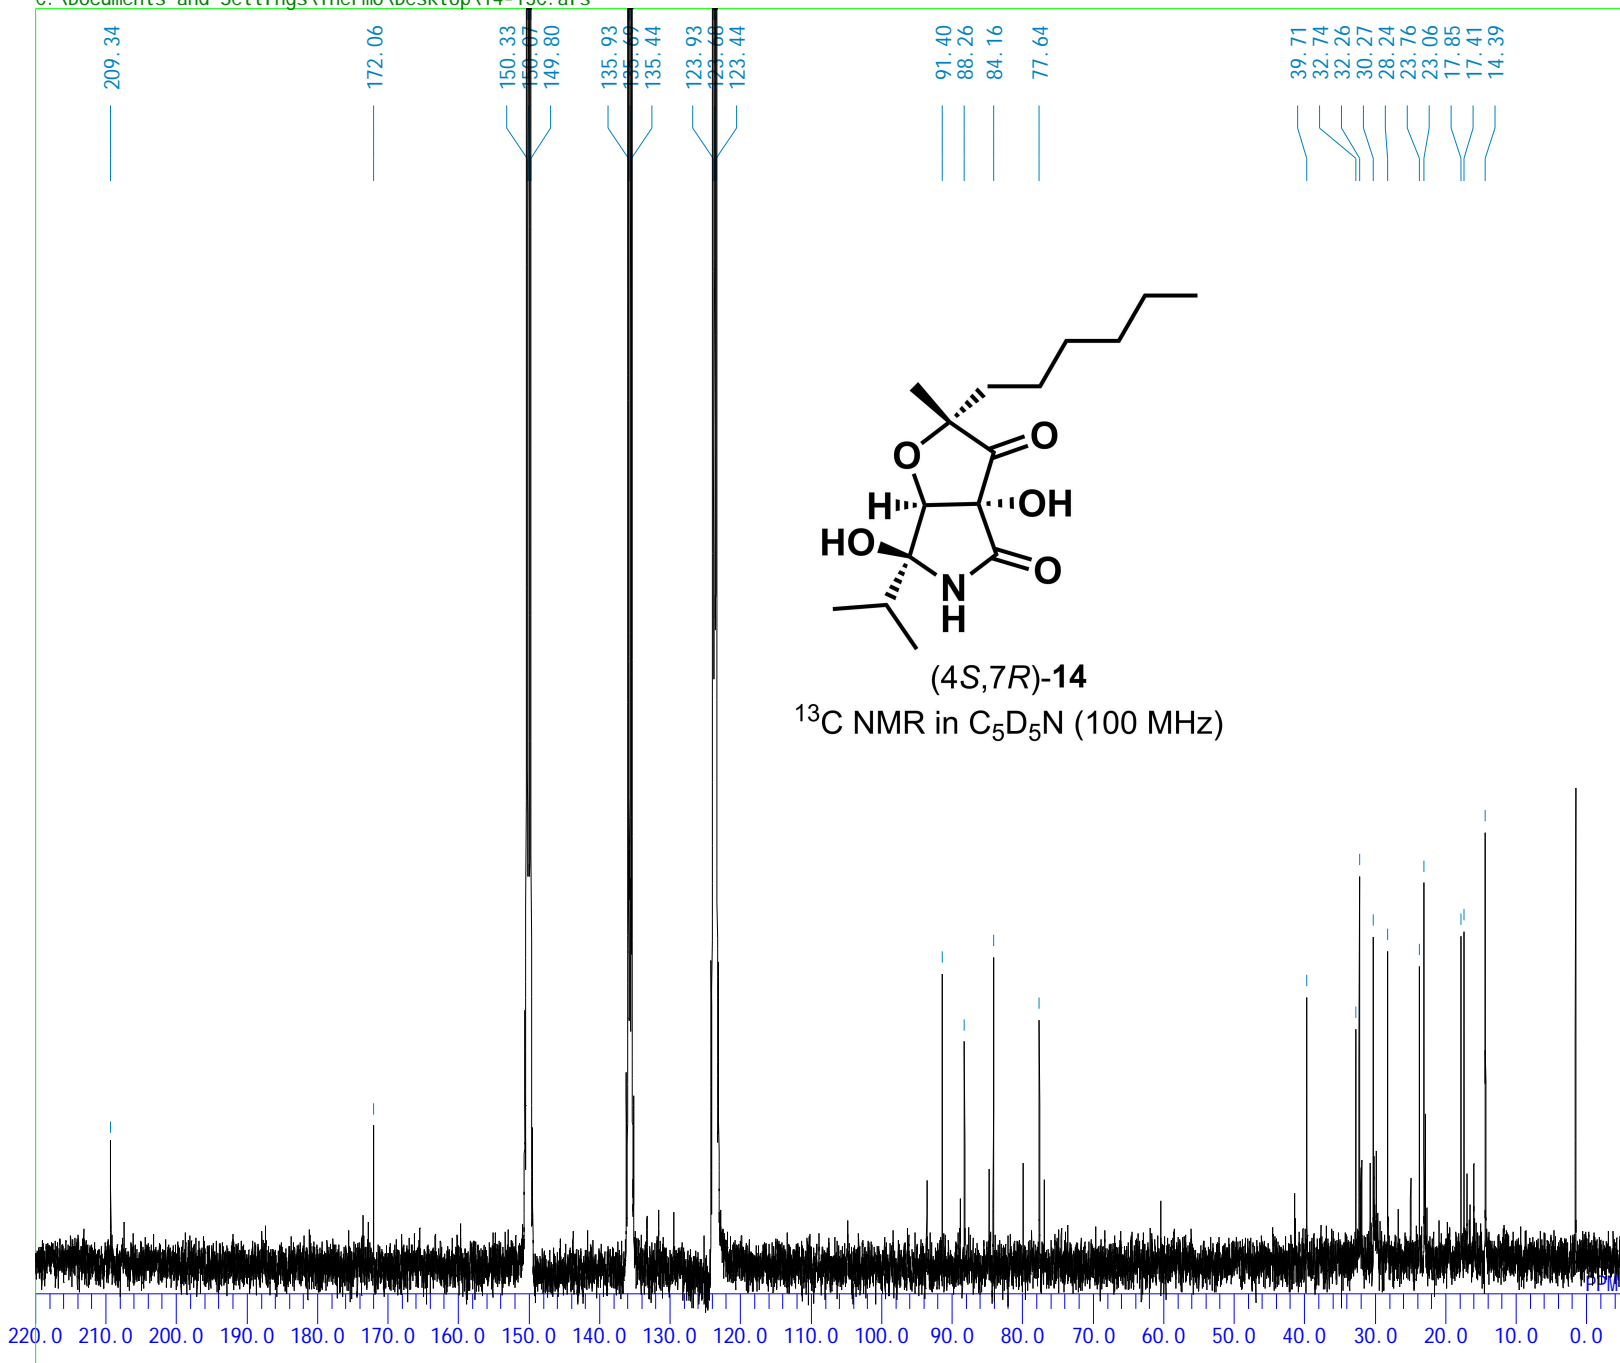

DFILE 14-13C.a1s  
 COMNT 14-13C  
 DATIM Sat Apr 07 20:51:06 2018  
 OBNUC  $^{13}\text{C}$   
 EXMOD BCM  
 OBFRO 100.40 MHz  
 OBSET 125.00 KHz  
 OBFIN 10500.00 Hz  
 POINT 32768  
 FREQU 27118.64 Hz  
 SCANS 5383  
 ACQTM 1.2083 sec  
 PD 1.7920 sec  
 PW1 5.80 usec  
 IRNUC 1H  
 CTEMP 24.0 c  
 SLVNT  $\text{C}_5\text{D}_5\text{N}$   
 EXREF 150.07 ppm  
 BF 1.20 Hz  
 RGAIN 23
